# Supplementary material for: A metabolomic snapshot through NMR revealed differences in phase transition during the induction of reproduction in Ulva ohnoi (Chlorophyta)
Source: Royal Society of Chemistry journal article supplement (doi:10.1039/d3mo00197k), 2024-01-19
Supplement: d3mo00197k1.pdf [file d3mo00197k1.pdf]

## Supplementary Information

### **A metabolomic snapshot through NMR revealed differences in phase transition during induction of reproduction in *Ulva***

**Payal A. Bodar<sup>a,b</sup>, Rajendra Singh Thakur<sup>\*b,c</sup>, Jasmine Rajai<sup>a</sup>, Satej Bhushan<sup>a</sup>,**

**Vaibhav A. Mantri<sup>\*a,b</sup>**

<sup>a</sup> *Applied Phycology and Biotechnology Division, CSIR- Central Salt & Marine Chemicals  
Research Institute, Gijubhai Badheka Road, Bhavnagar – 364002, India*

<sup>b</sup> *Academy of Scientific and Innovative Research (AcSIR), Ghaziabad - 201002, India*

<sup>c</sup> *Analytical and Environmental Science Division and Centralized Instrument Facility,  
Bhavnagar 364002, India*

Author for Correspondence:

rthakur@csmcri.res.in (R.S. Thakur)

vaibhav@csmcri.res.in (V.A. Mantri)

Tel: +91-278-2567760 Ext. 6131; fax: +91-278-2566970

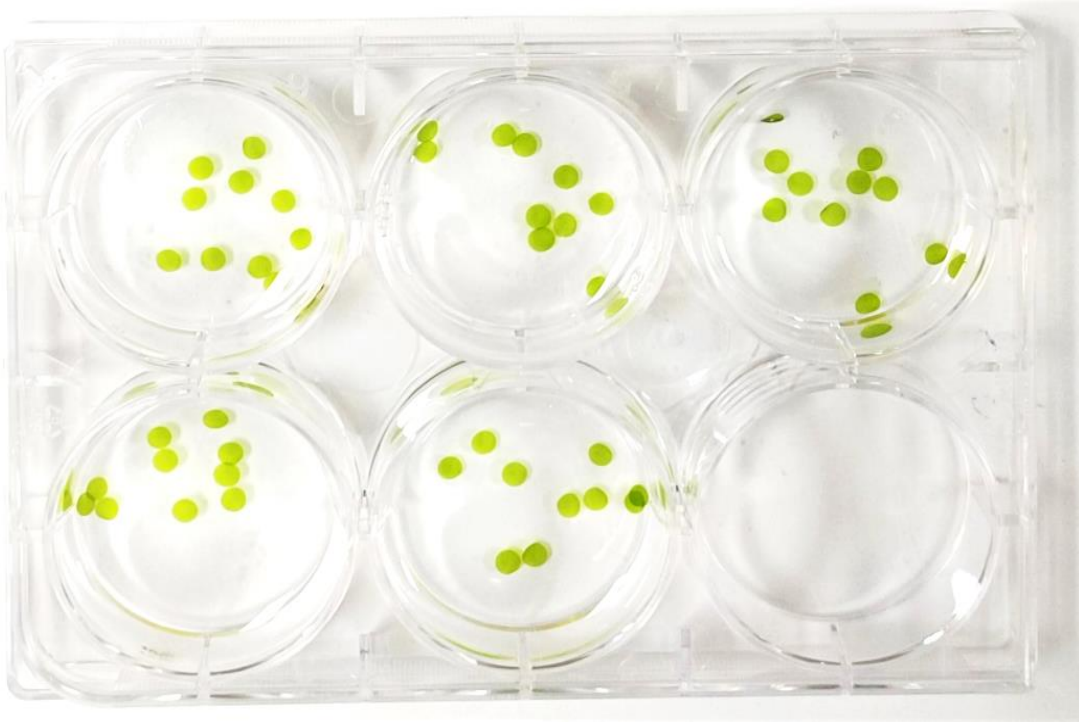

Figure S1. Excised discs (3mm) from the thallus of *Ulva ohnoi*.

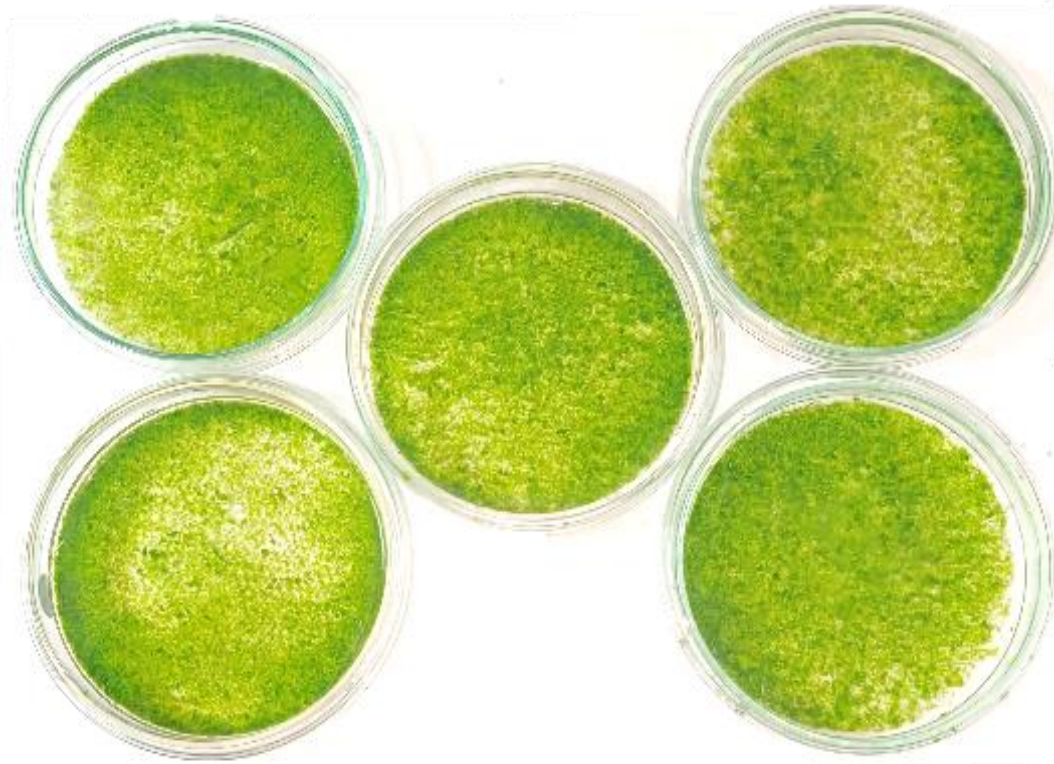

Figure S2. Fragmented thallus of *Ulva ohnoi* after artificial induction of reproduction.

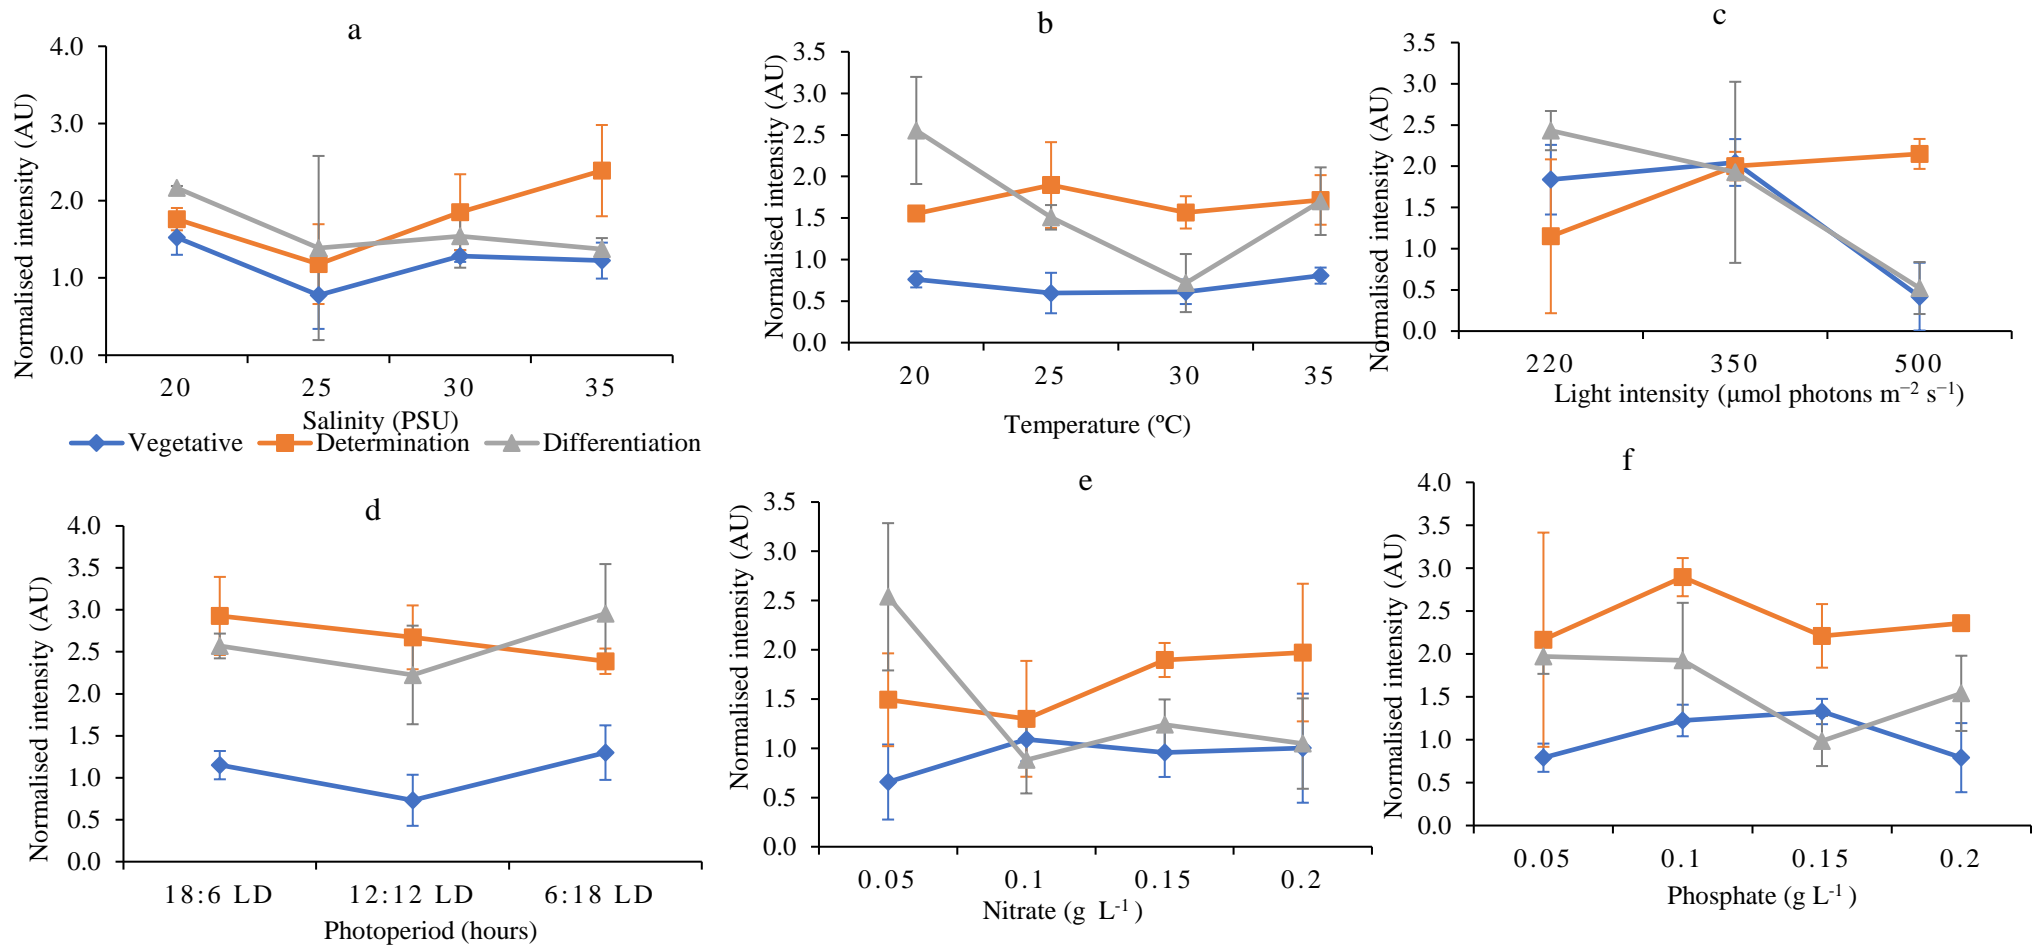

Figure S3. Fluctuation of tryptophan in vegetative, determination and differentiation phase with respect to variables of a. Salinity, b. Temperature, c. Light Intensity, d. Photoperiod. e. Nitrate f. Phosphate.



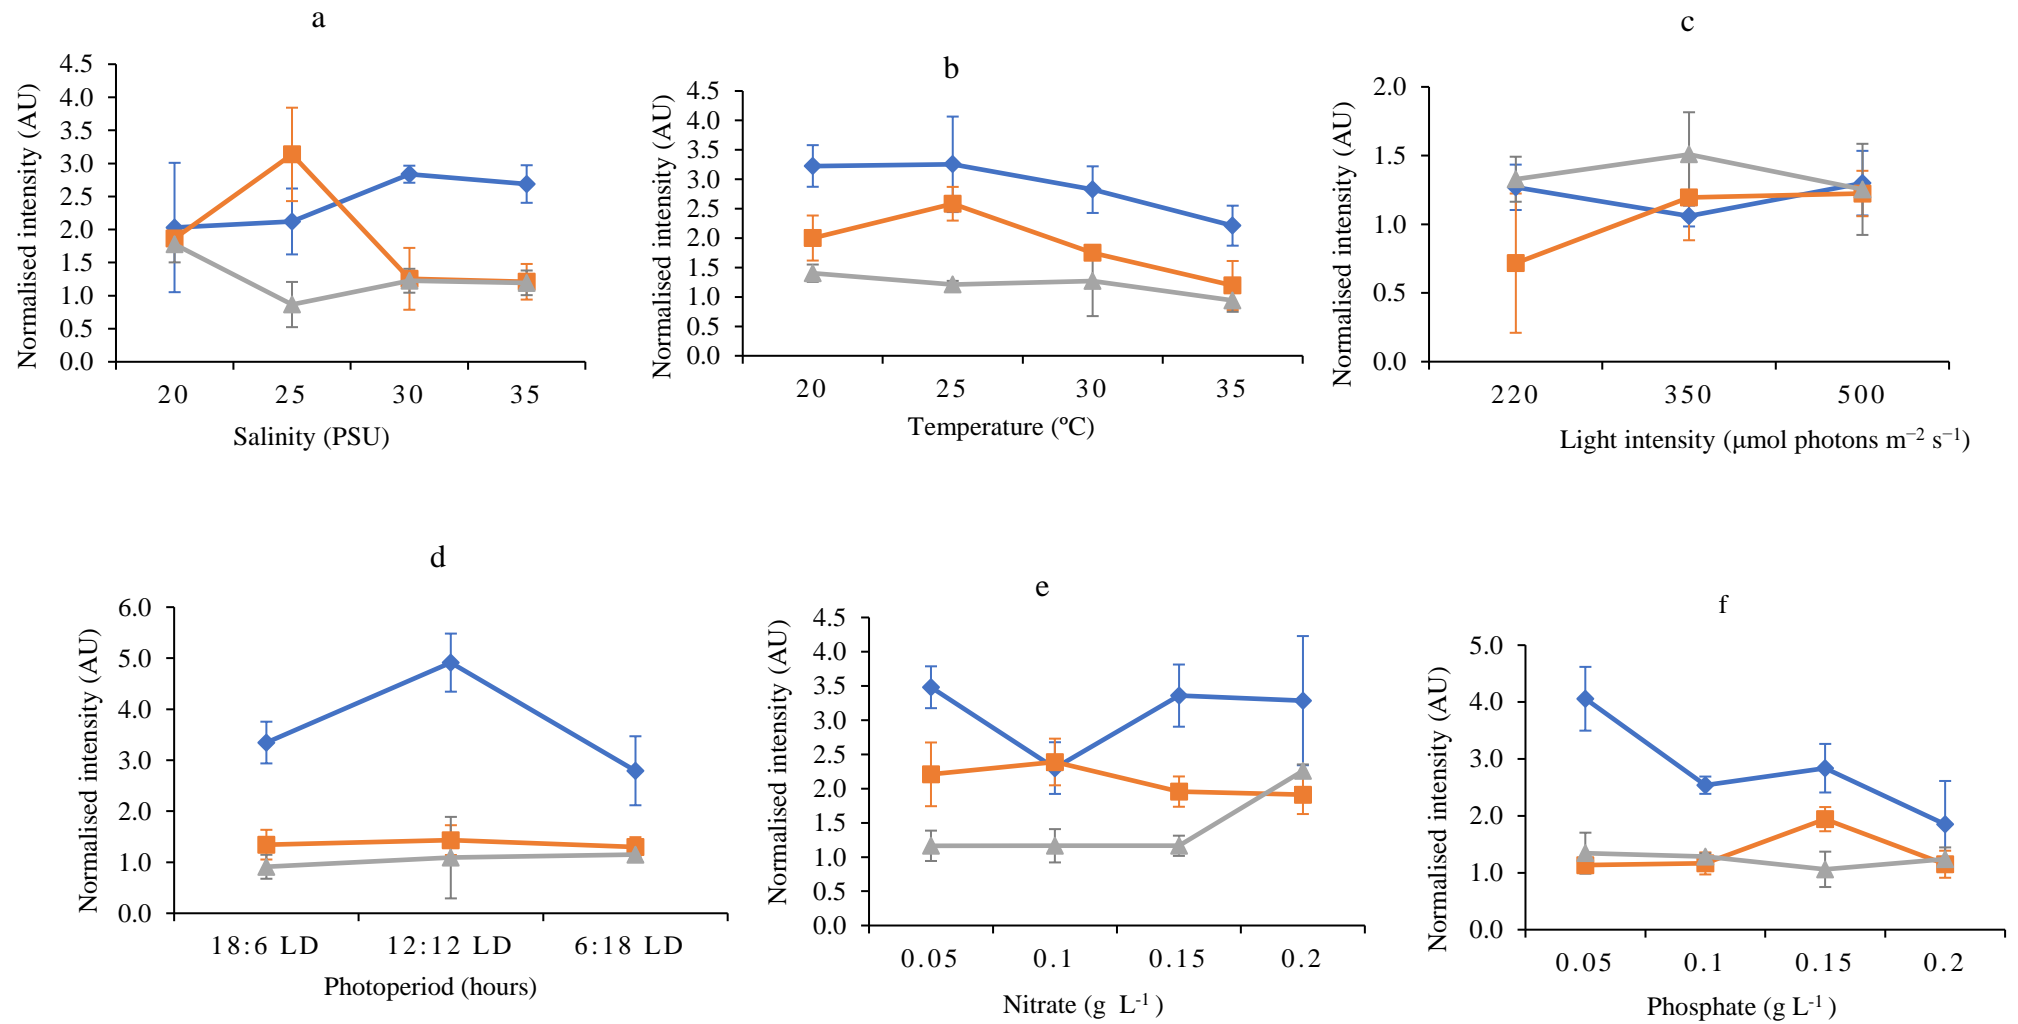

Figure S4. Fluctuation of lactic acid in vegetative, determination and differentiation phase with respect to variables of a. Salinity, b. Temperature, c. Light Intensity, d. Photoperiod. e. Nitrate f. Phosphate.

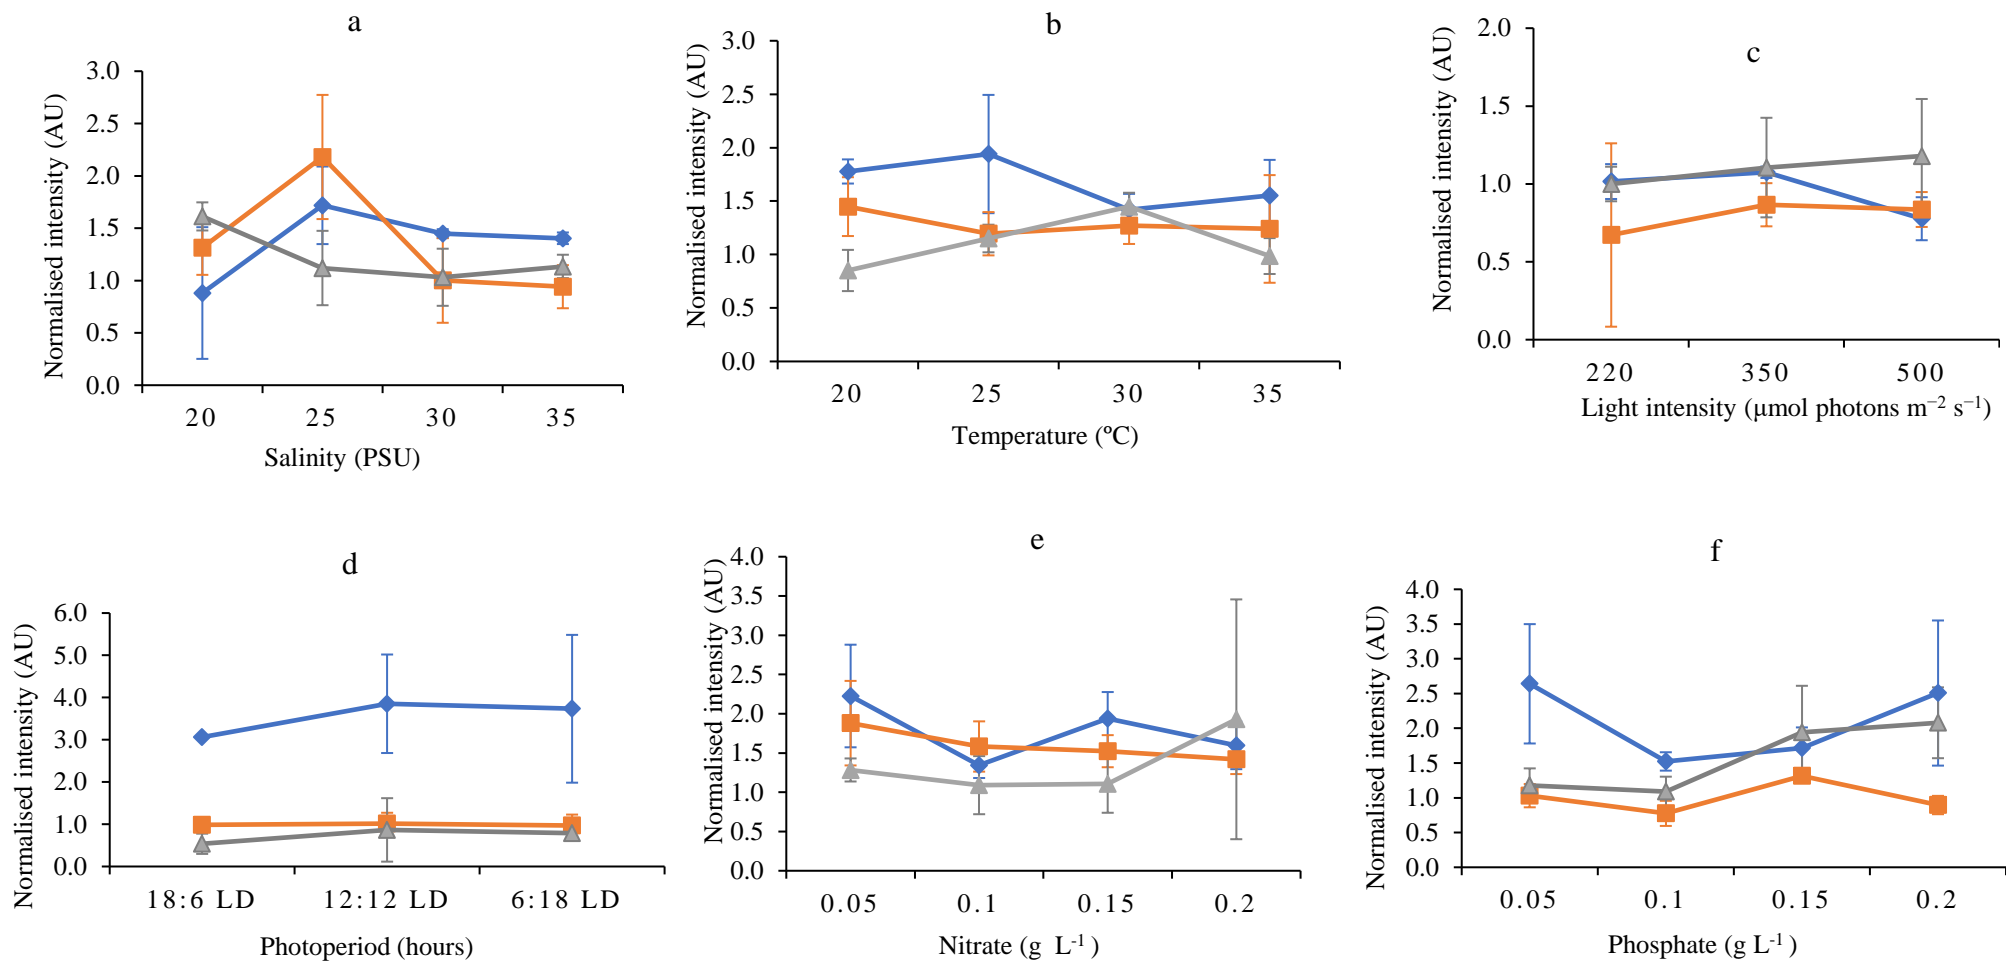

Figure S5. Fluctuation of L- Cysteinesulfinic acid in vegetative, determination and differentiation phase with respect to variables of a. Salinity, b. Temperature, c. Light Intensity, d. Photoperiod. e. Nitrate f. Phosphate.

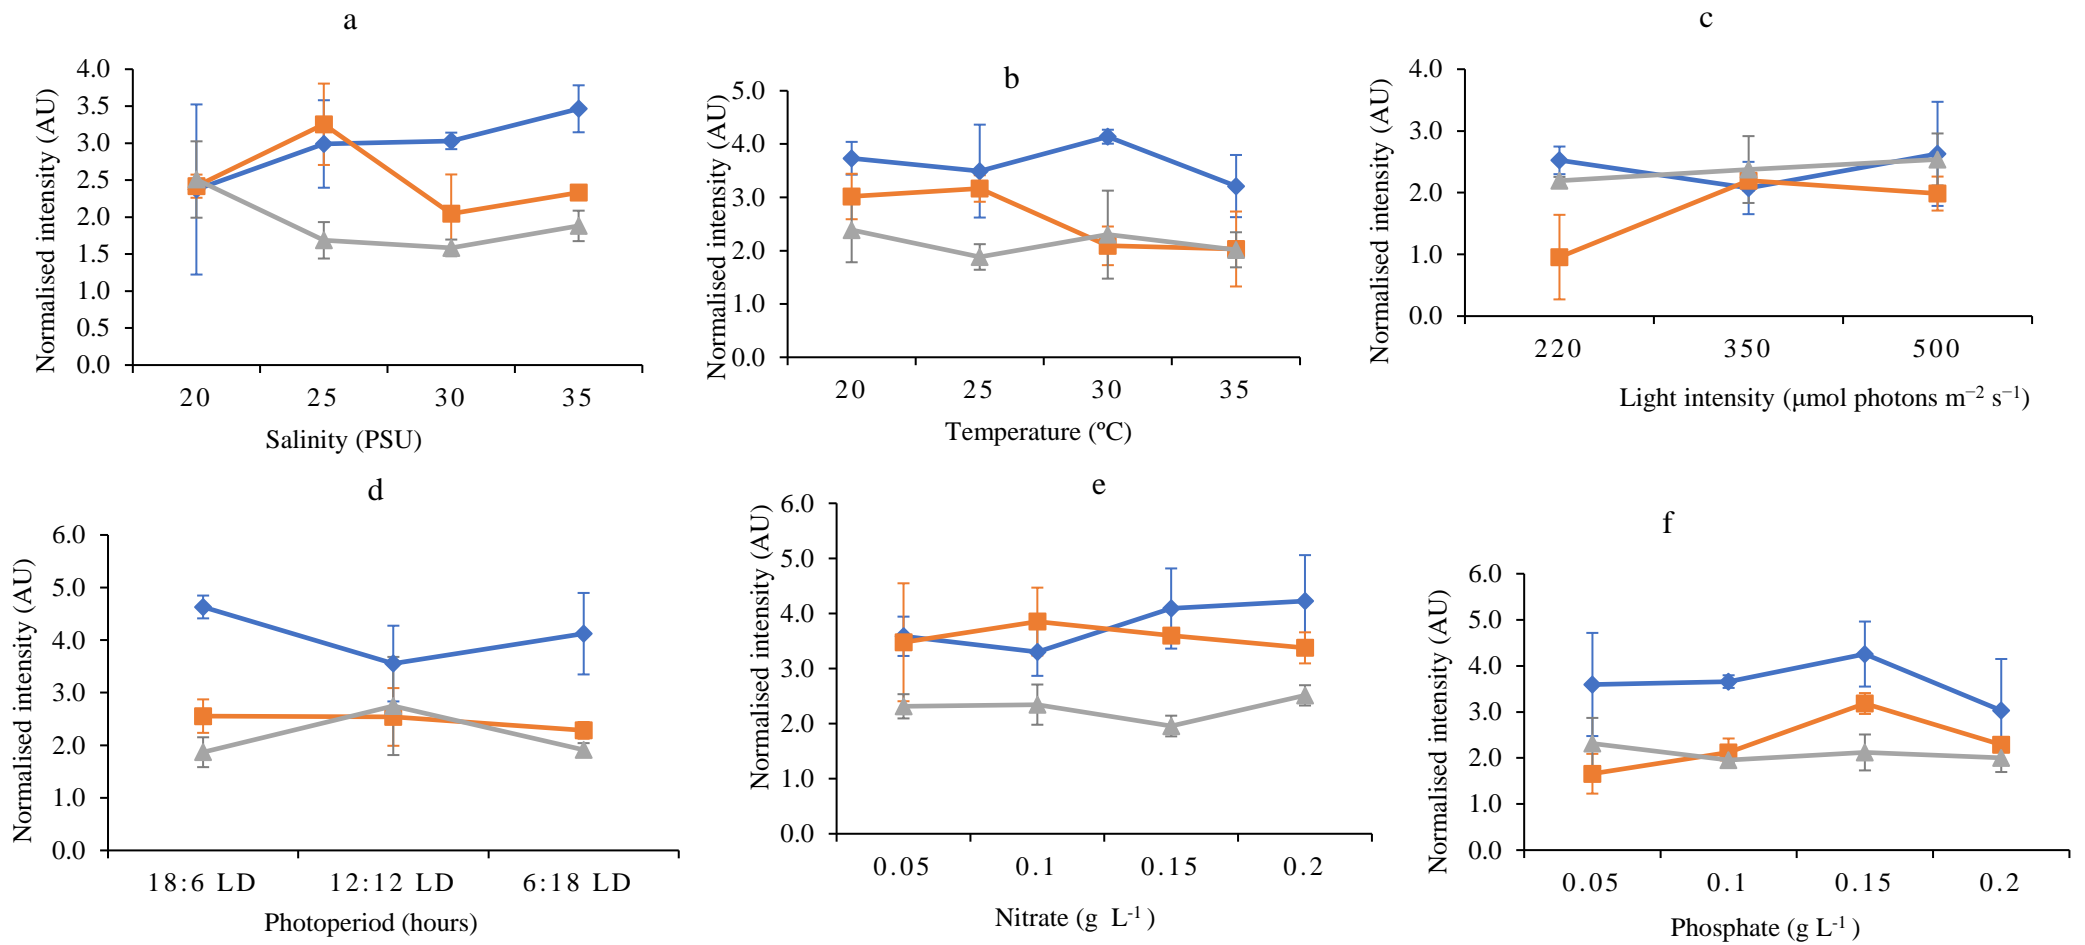

Figure S6. Fluctuation of galactose in vegetative, determination and differentiation phase with respect to variables of a. Salinity, b. Temperature, c. Light Intensity, d. Photoperiod. e. Nitrate f. Phosphate.

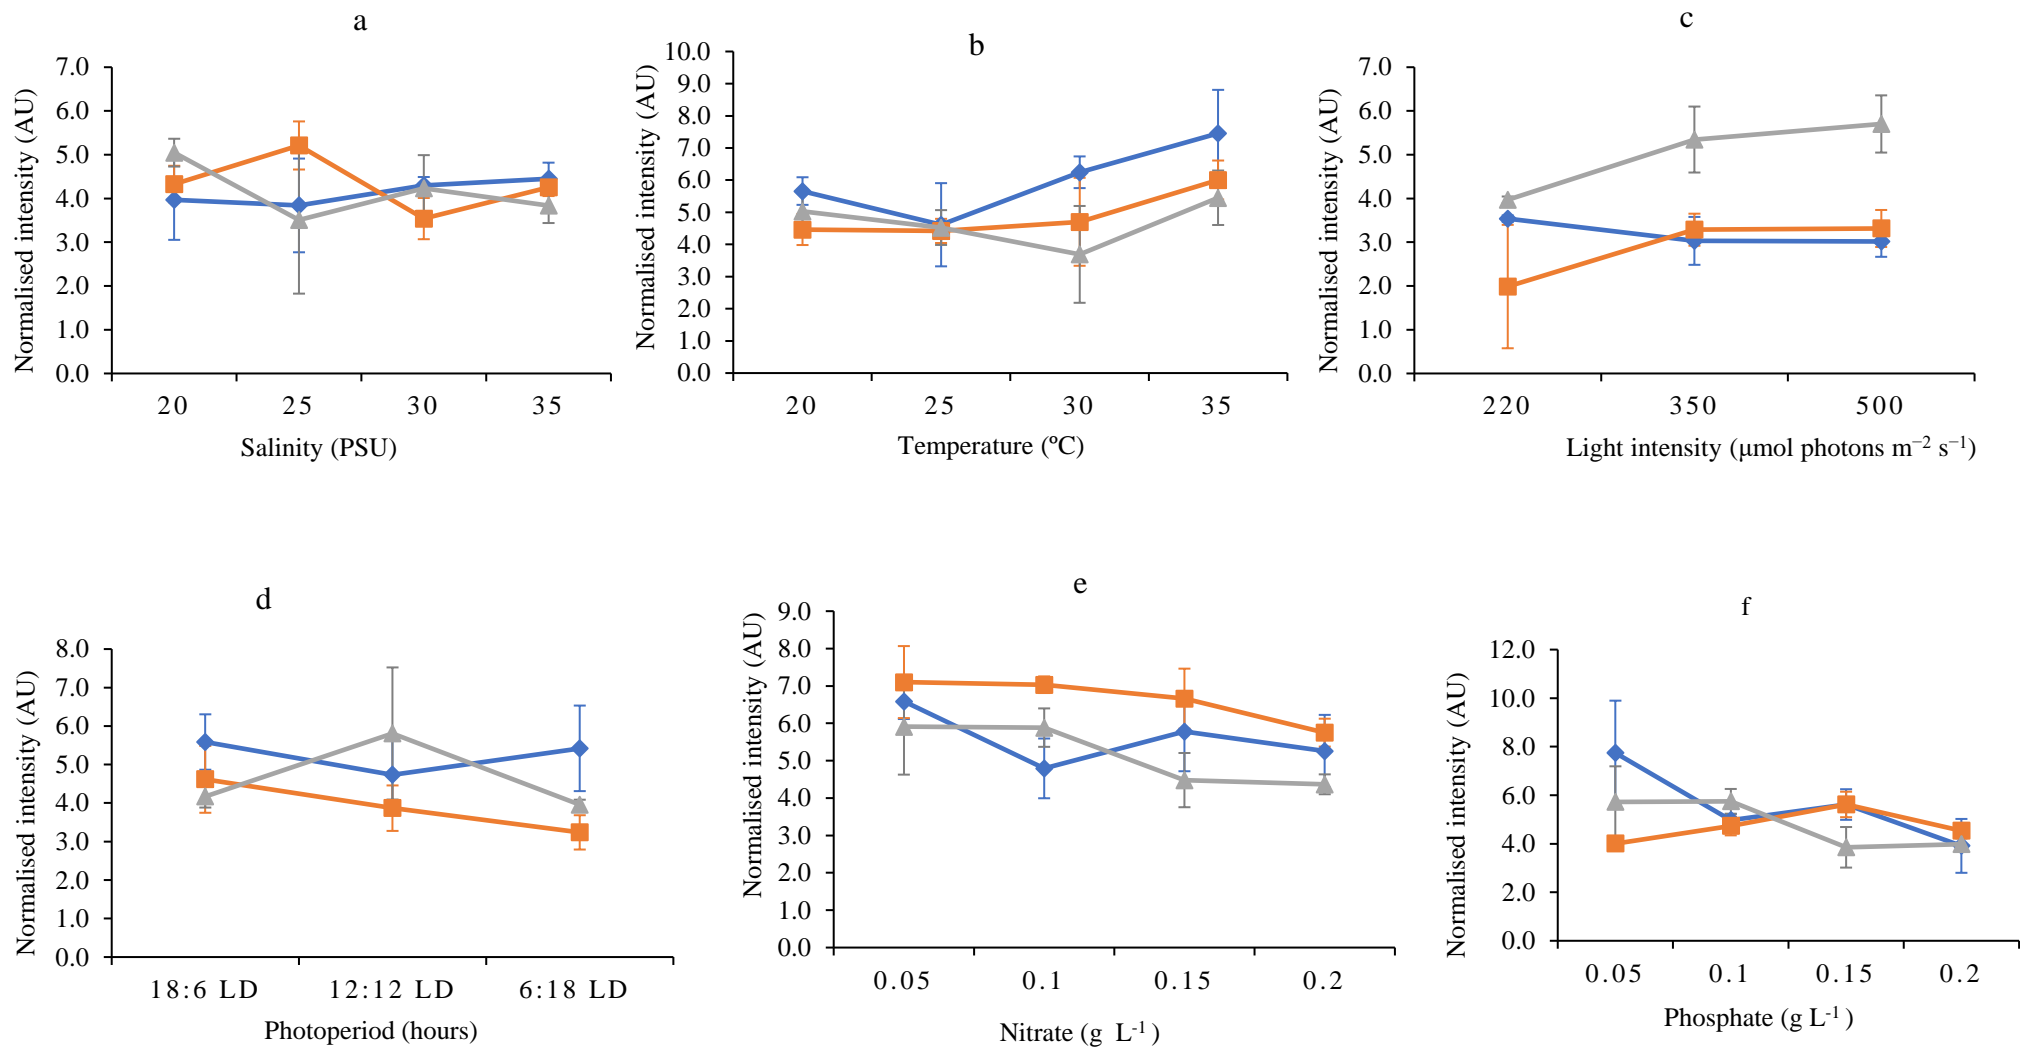

Figure S7. Fluctuation of ethanolamine in vegetative, determination and differentiation phase with respect to variables of a. Salinity, b. Temperature, c. Light Intensity, d. Photoperiod. e. Nitrate f. Phosphate.

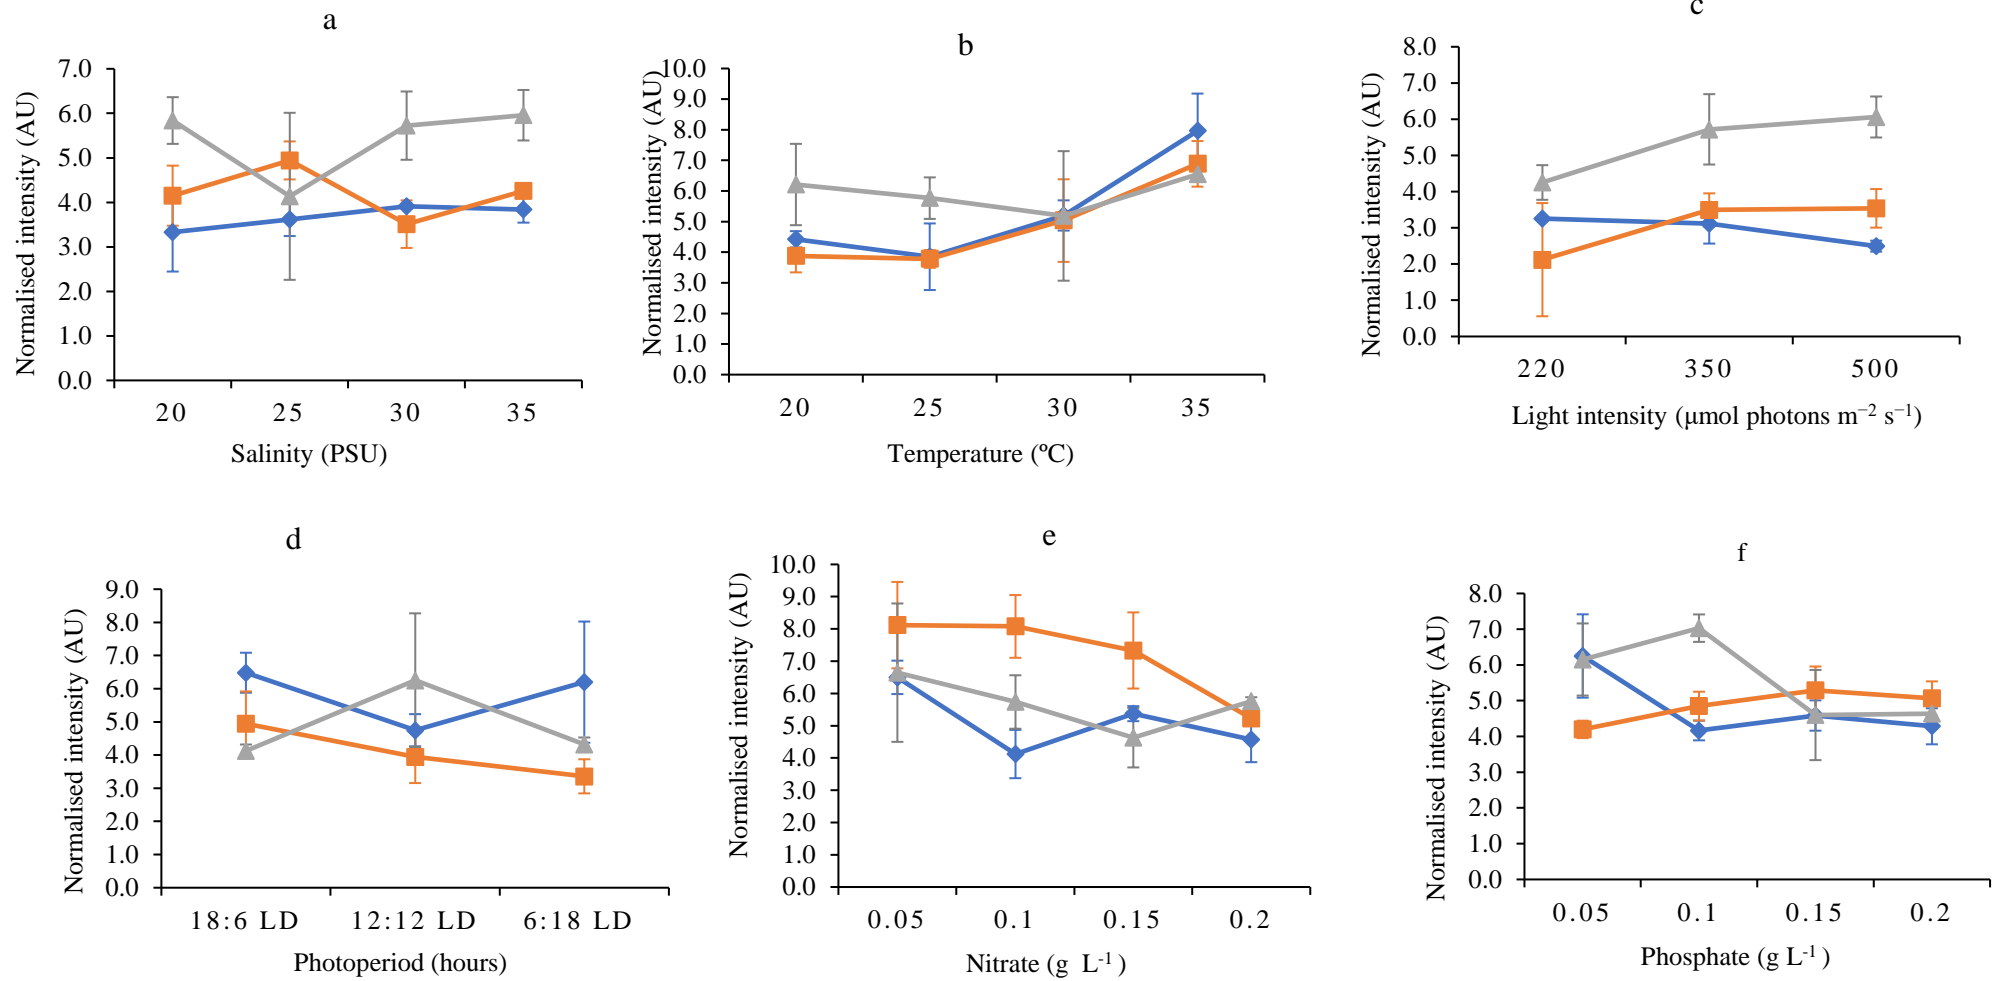

Figure S8. Fluctuation of aspartate in vegetative, determination and differentiation phase with respect to variables of a. Salinity, b. Temperature, c. Light Intensity, d. Photoperiod. e. Nitrate f. Phosphate.

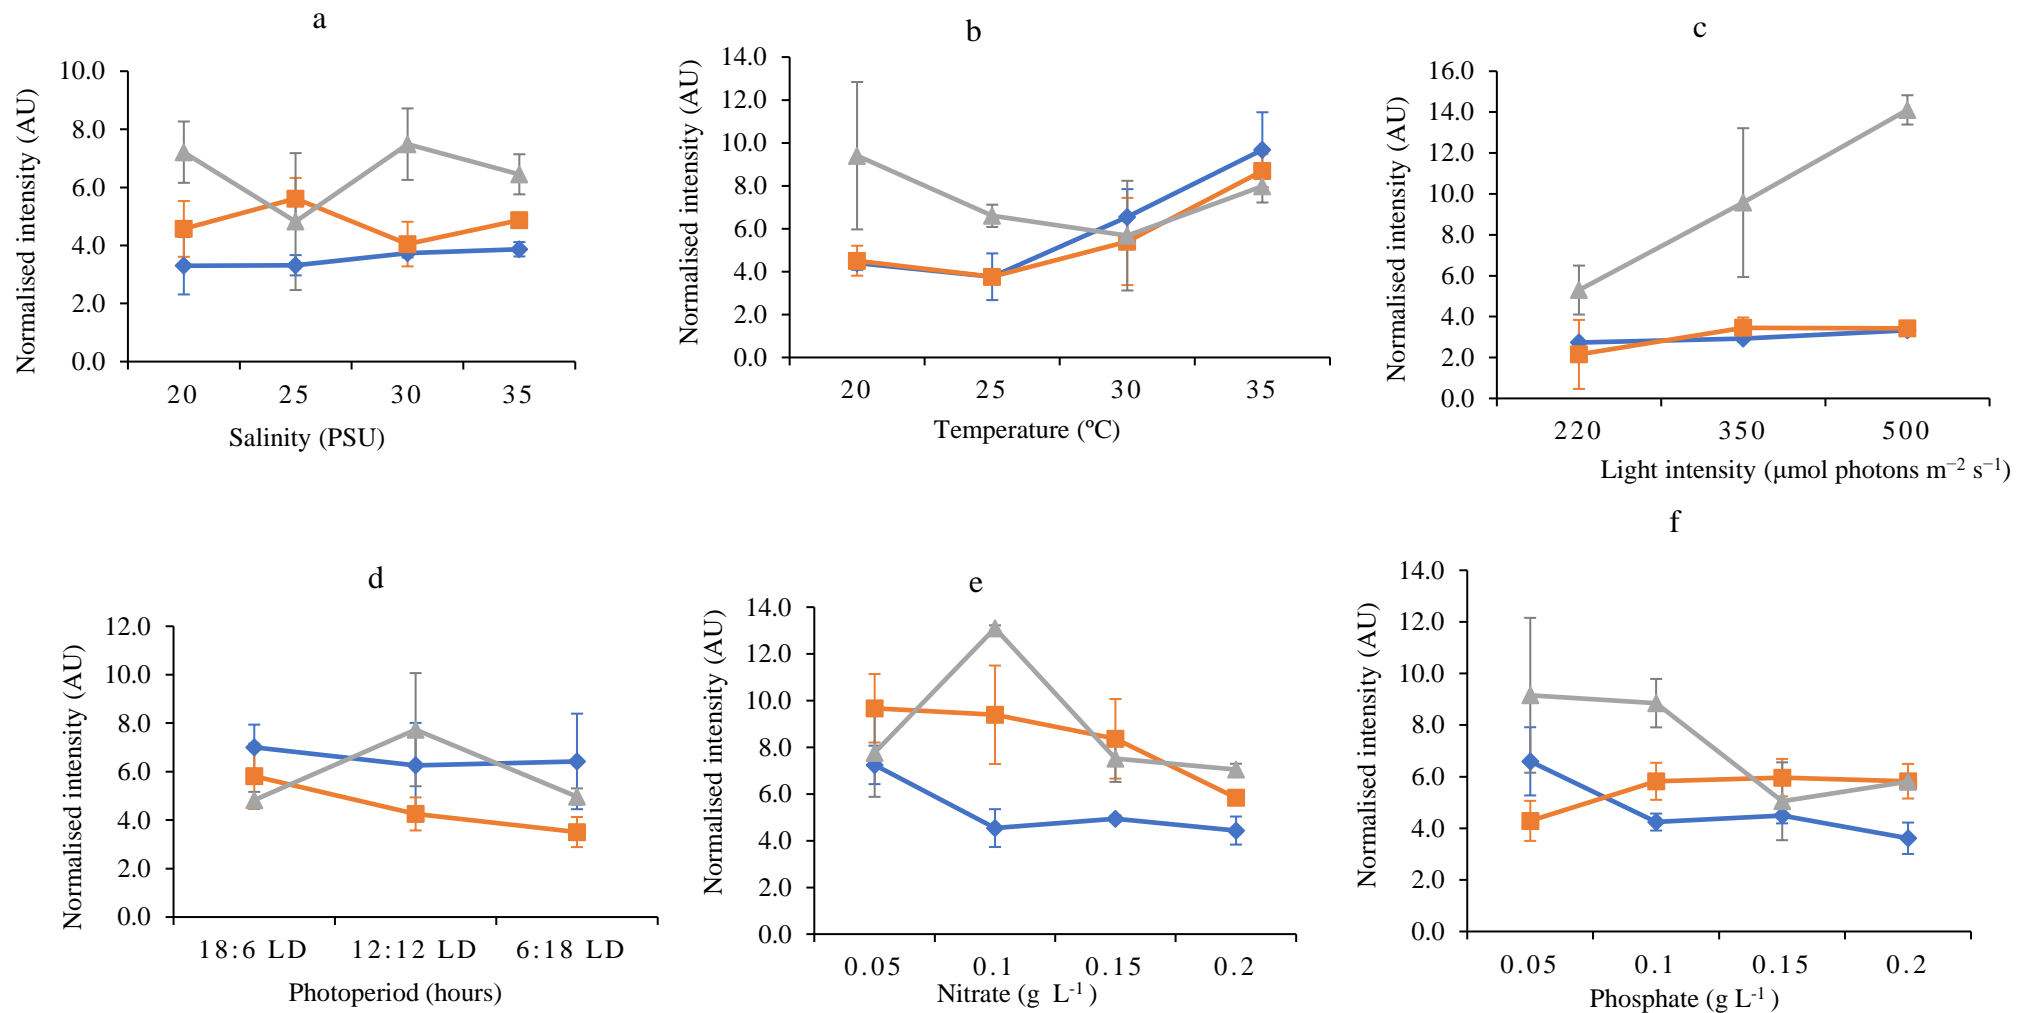

Figure S9. Fluctuation of creatine in vegetative, determination and differentiation phase with respect to variables of a. Salinity, b. Temperature, c. Light Intensity, d. Photoperiod, e. Nitrate f. Phosphate.

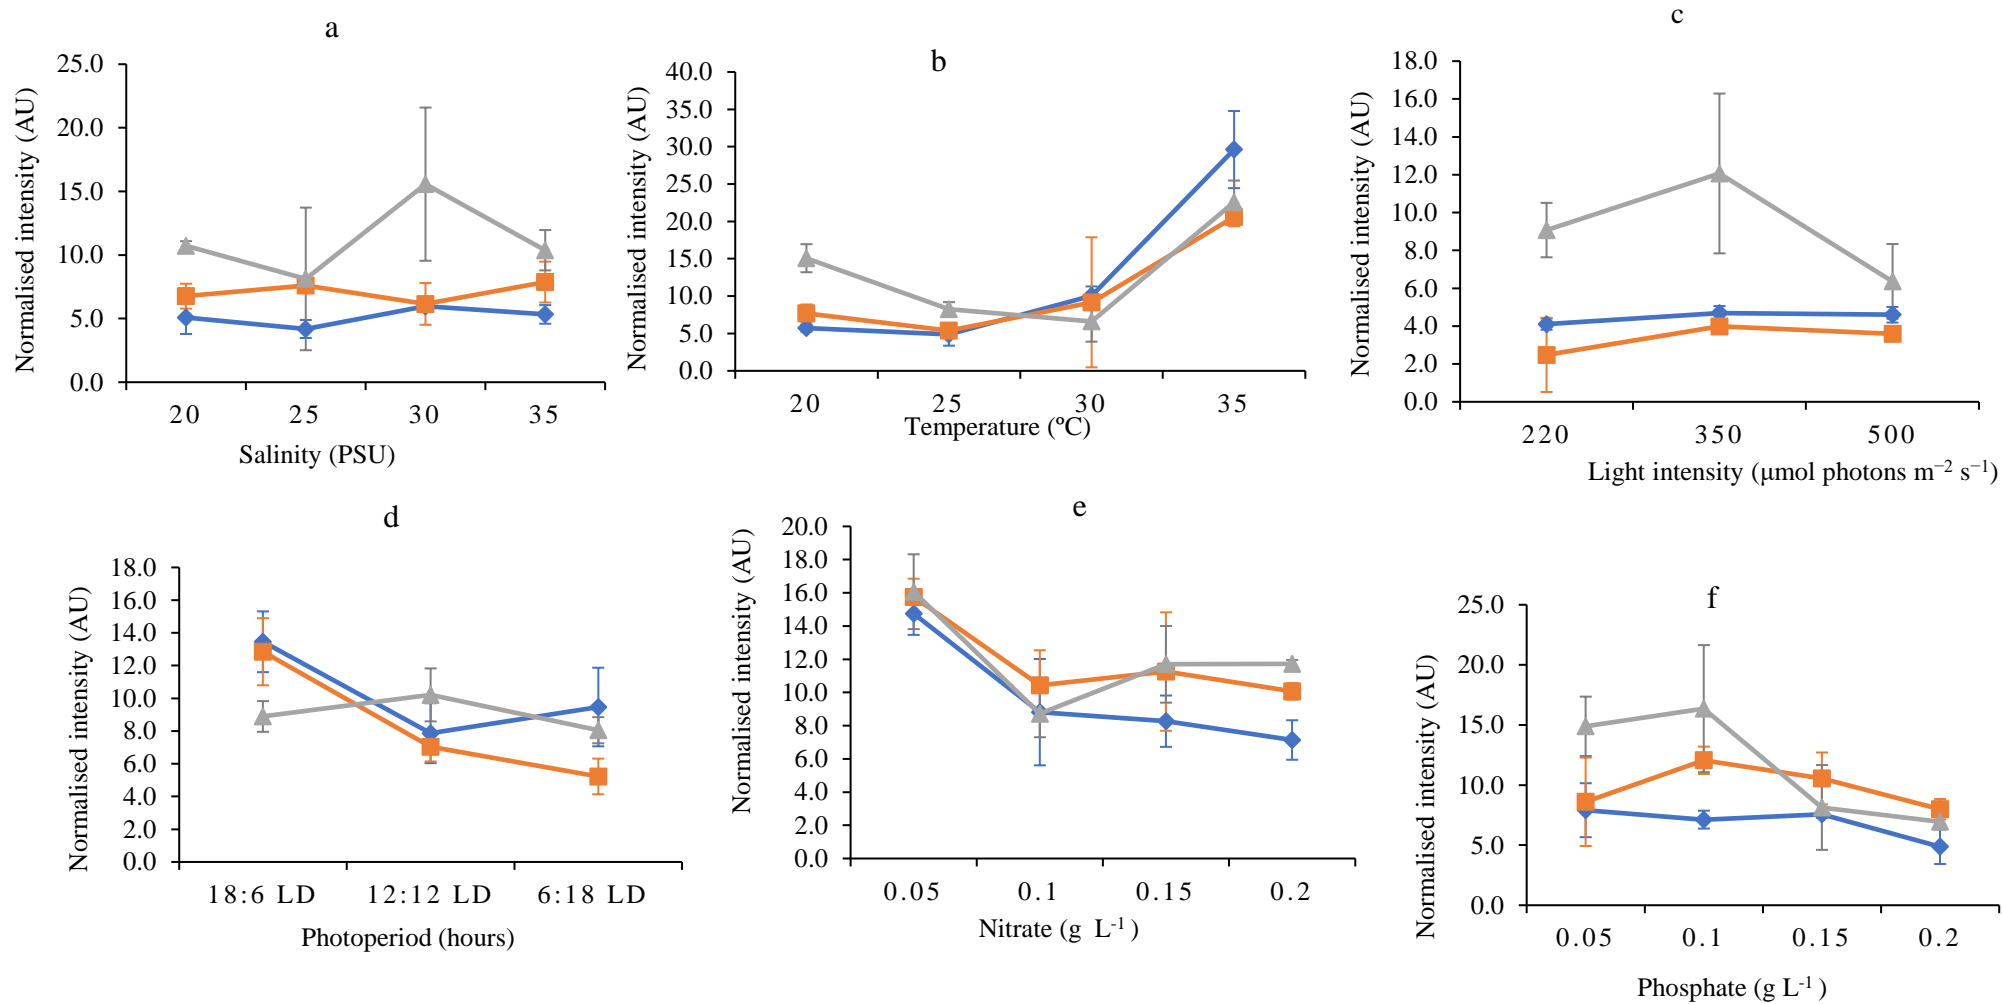

Figure S10. Fluctuation of sucrose in vegetative, determination and differentiation phase with respect to variables of a. Salinity, b. Temperature, c. Light Intensity, d. Photoperiod. e. Nitrate f. Phosphate.

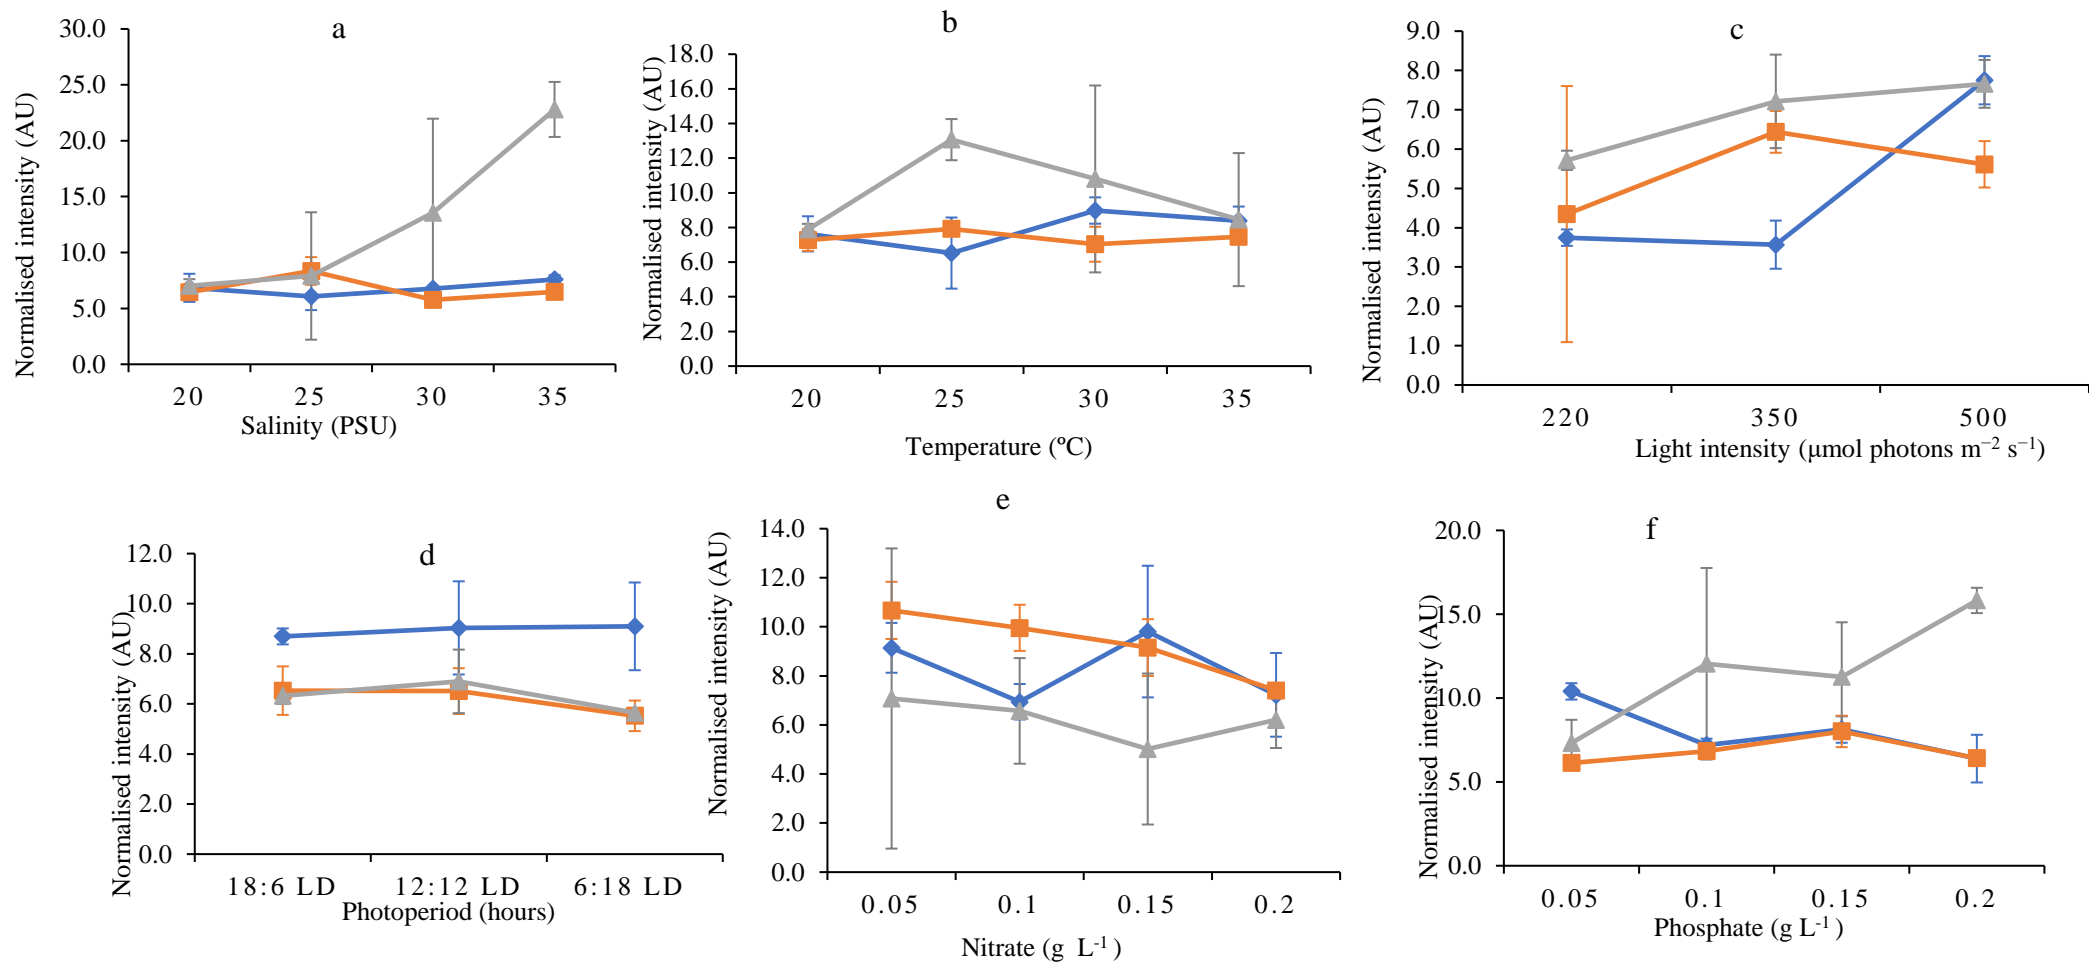

Figure S11. Fluctuation of acetylcholine in vegetative, determination and differentiation phase with respect to variables of a. Salinity, b. Temperature, c. Light Intensity, d. Photoperiod. e. Nitrate f. Phosphate.



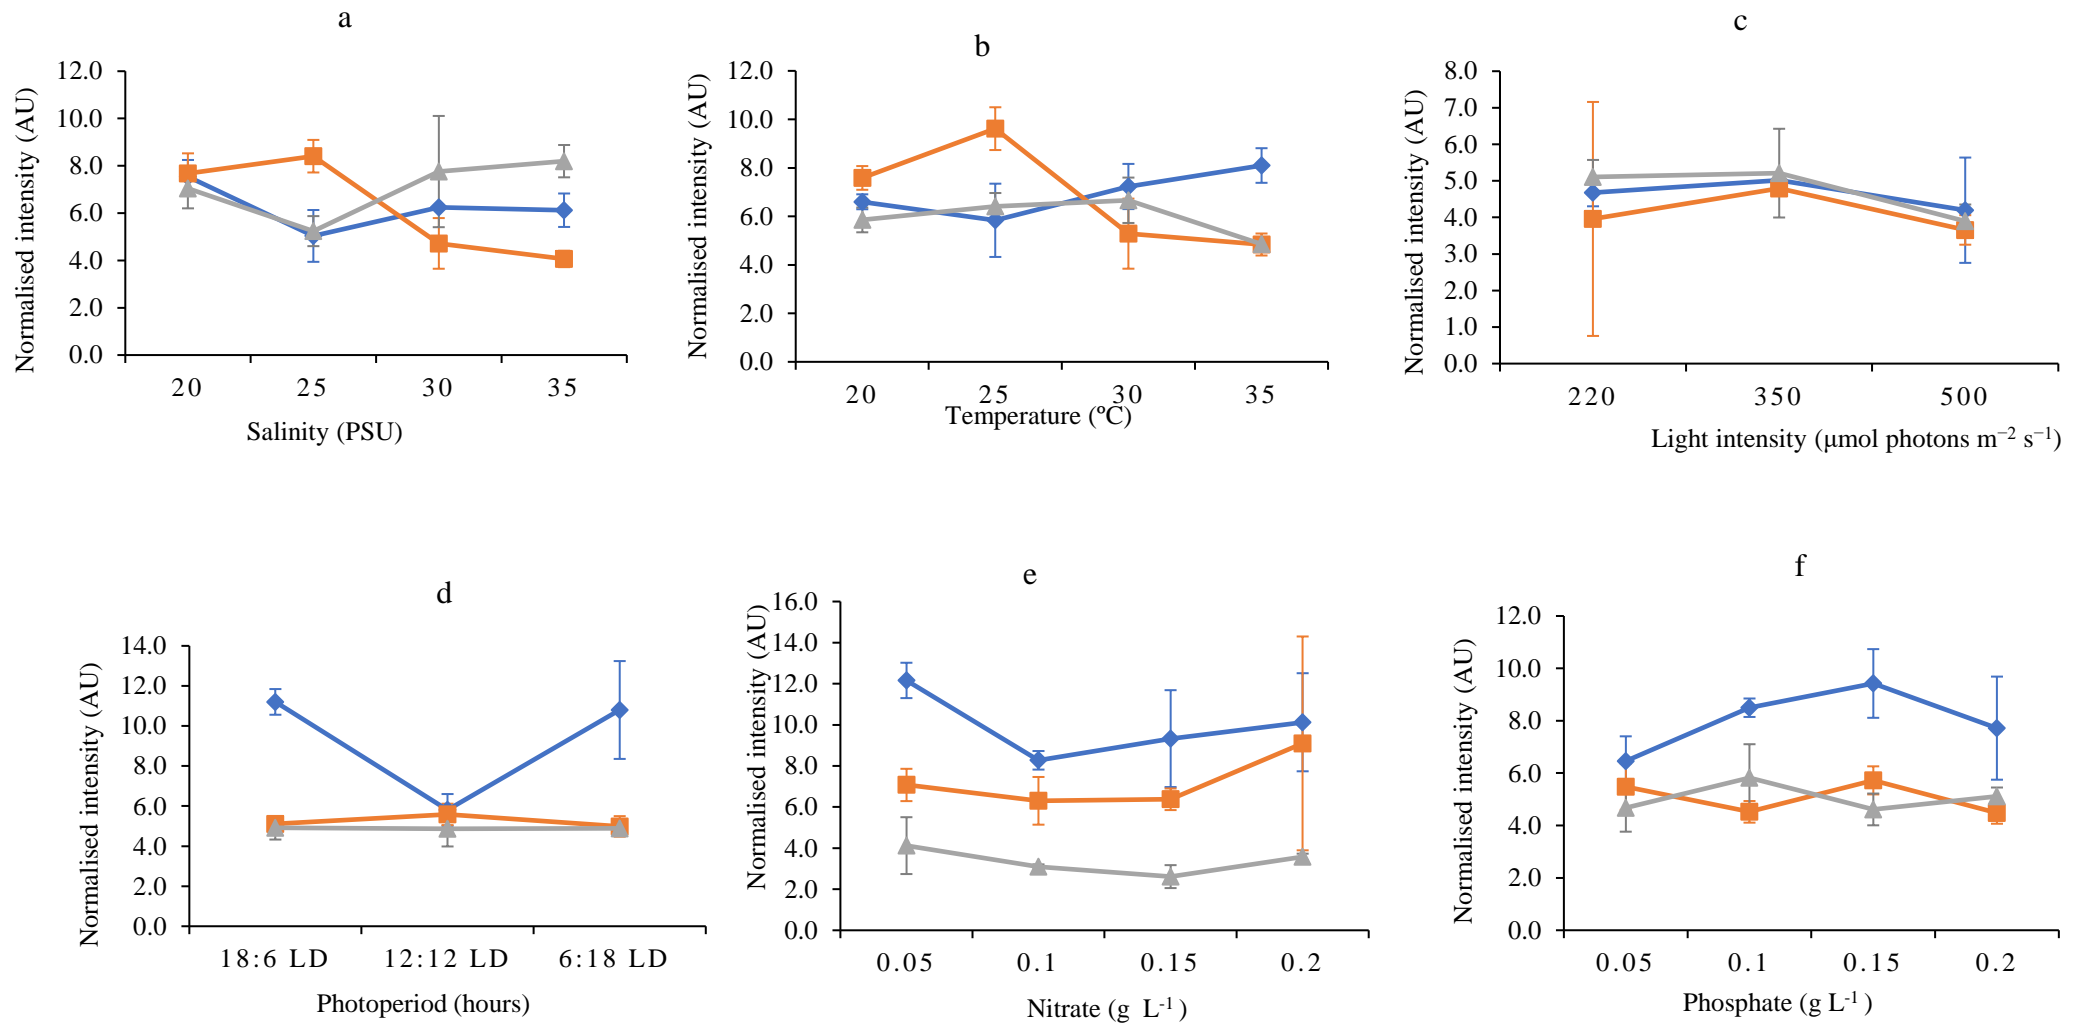

Figure S12. Fluctuation of glucose in vegetative, determination and differentiation phase with respect to variables of a. Salinity, b. Temperature, c. Light Intensity, d. Photoperiod. e. Nitrate f. Phosphate.

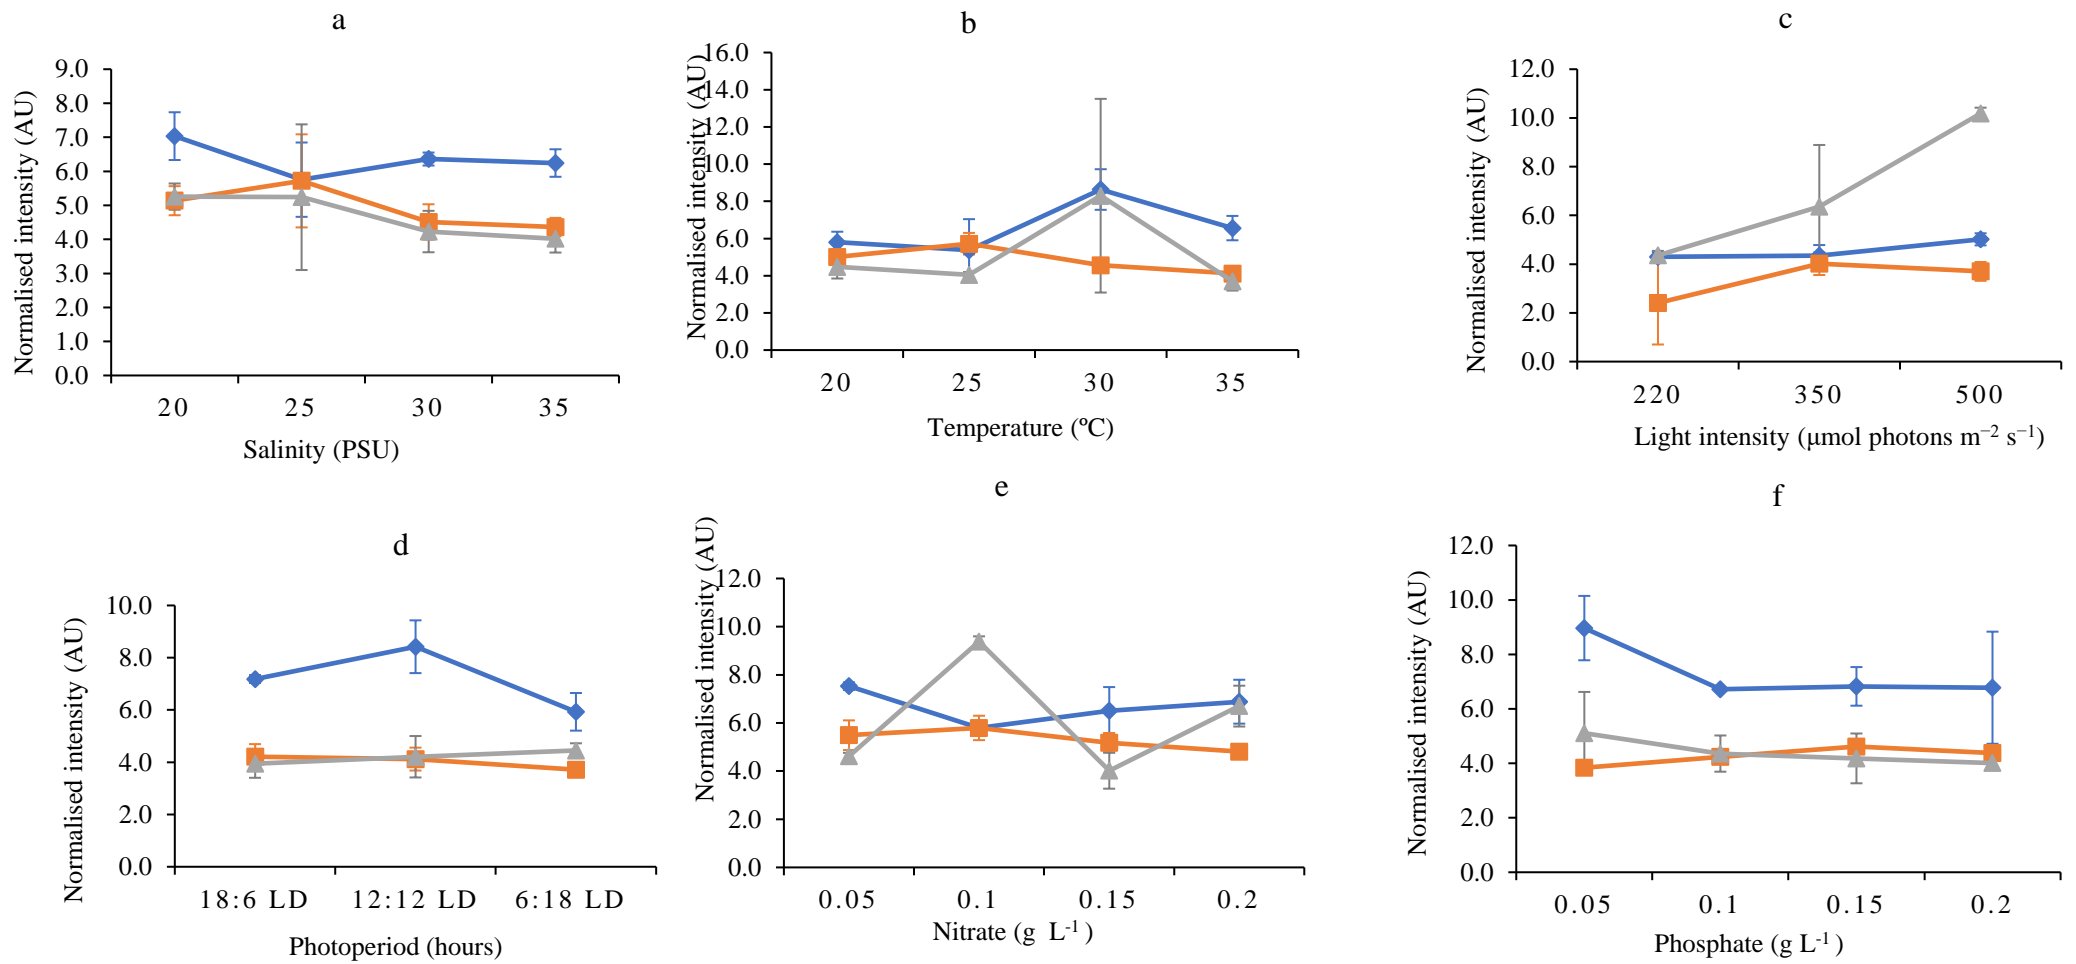

Figure S13. Fluctuation of sorbitol in vegetative, determination and differentiation phase with respect to variables of a. Salinity, b. Temperature, c. Light Intensity, d. Photoperiod. e. Nitrate f. Phosphate.

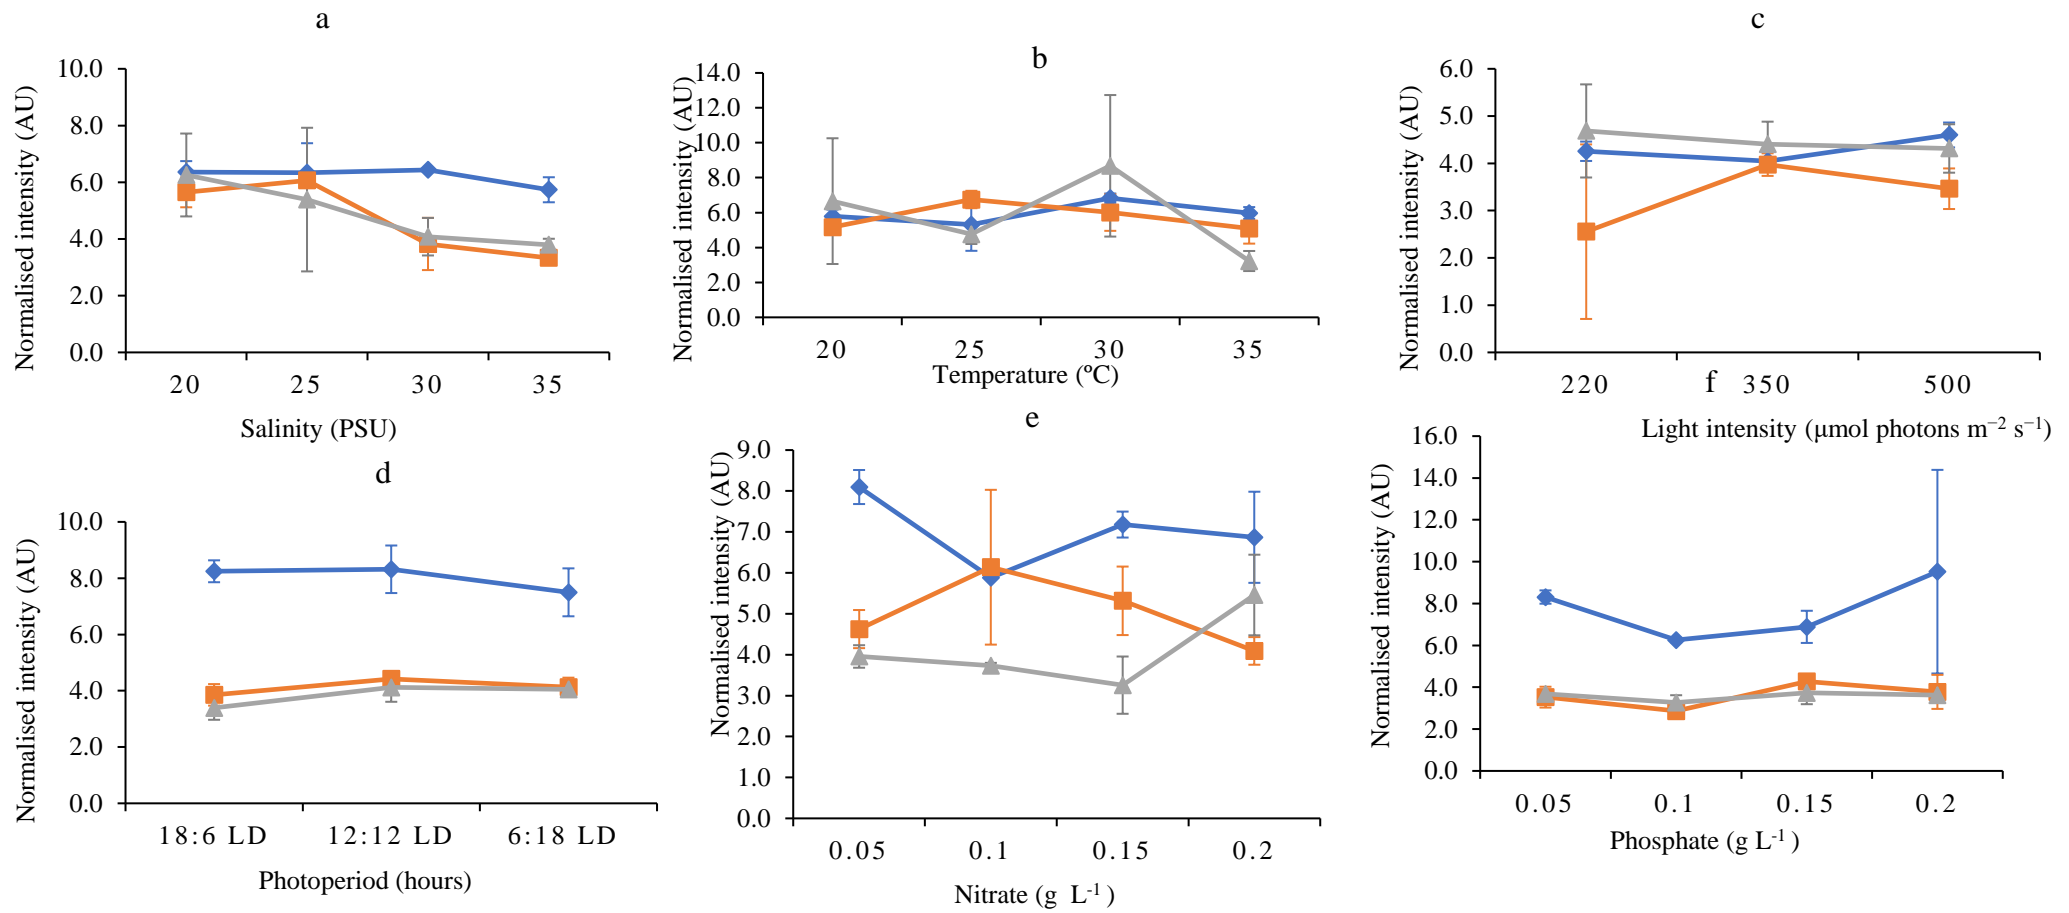

Figure S14. Fluctuation of coniferyl aldehyde in vegetative, determination and differentiation phase with respect to variables of a. Salinity, b. Temperature, c. Light Intensity, d. Photoperiod. e. Nitrate f. Phosphate.

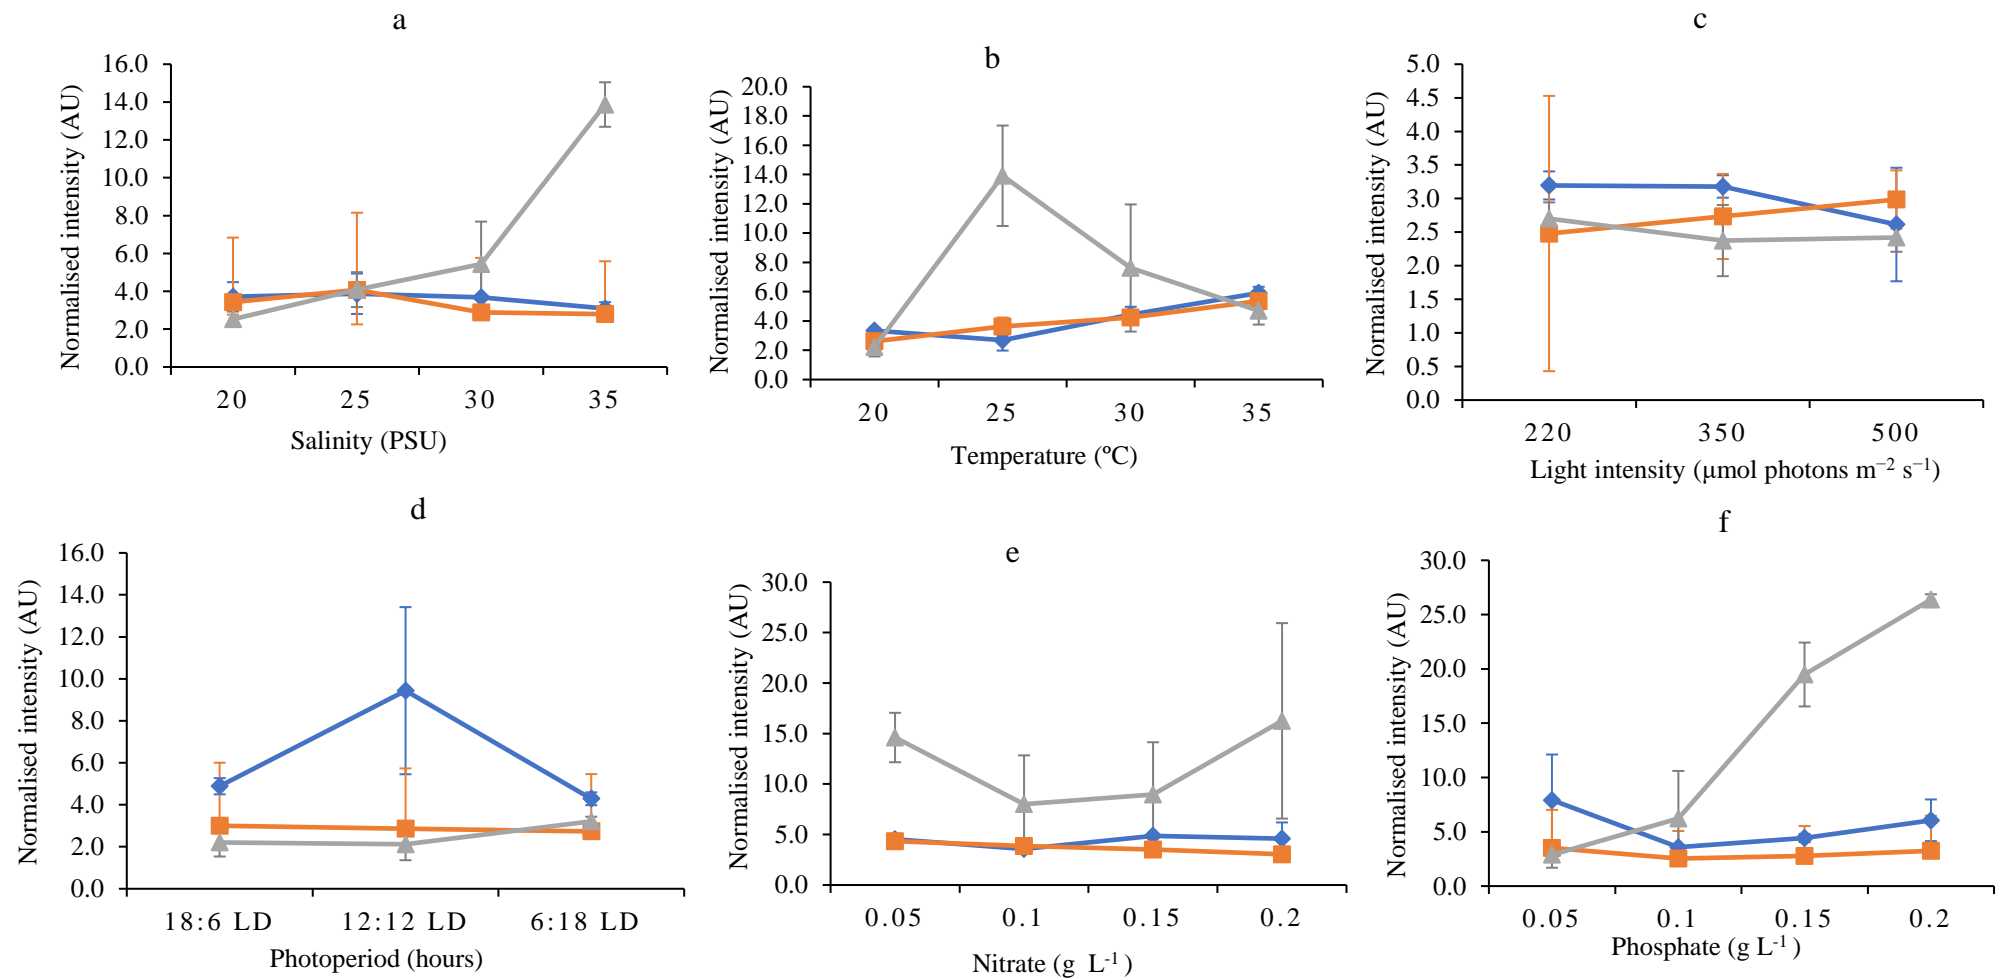

Figure S15. Fluctuation of glycine in vegetative, determination and differentiation phase with respect to variables of a. Salinity, b. Temperature, c. Light Intensity, d. Photoperiod. e. Nitrate f. Phosphate.

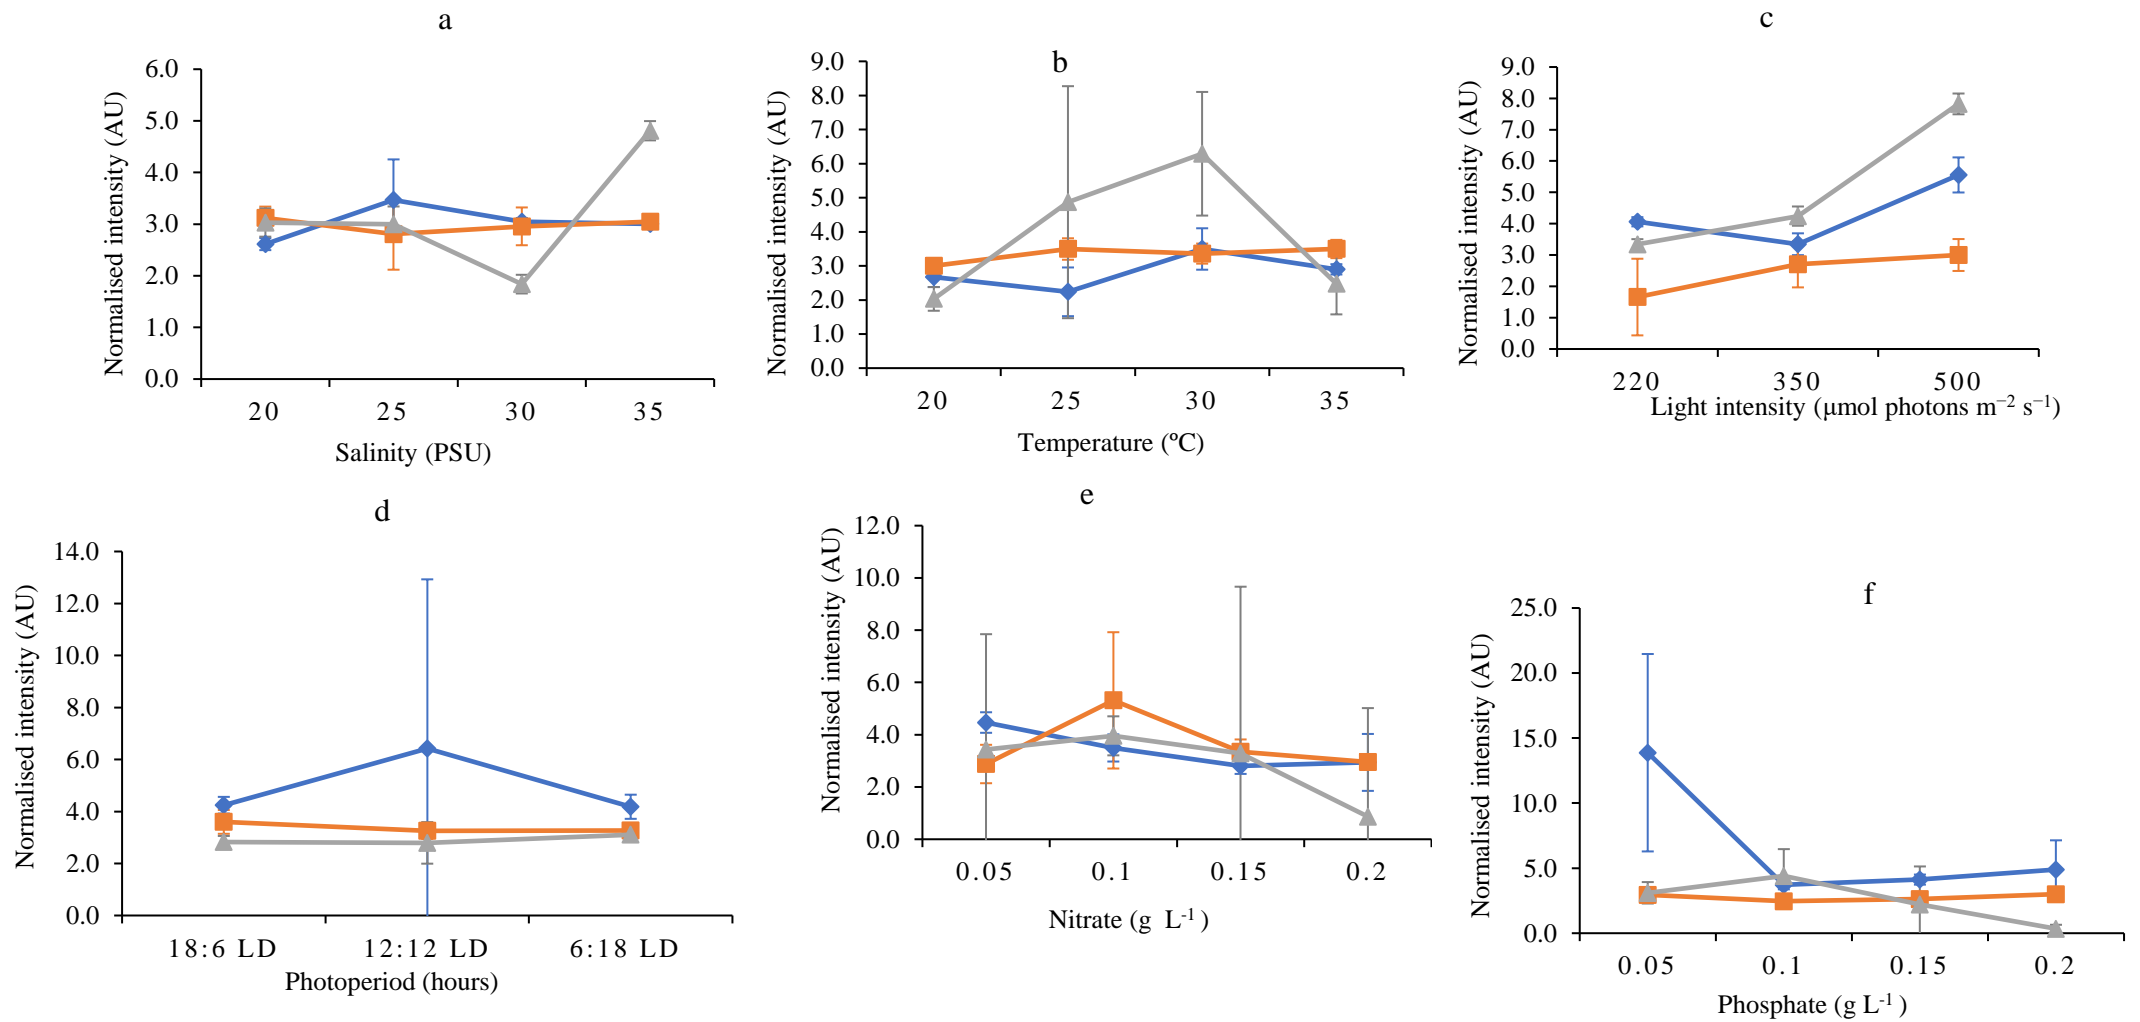

Figure S16. Fluctuation of choline in vegetative, determination and differentiation phase with respect to variables of a. Salinity, b. Temperature, c. Light Intensity, d. Photoperiod. e. Nitrate f. Phosphate.

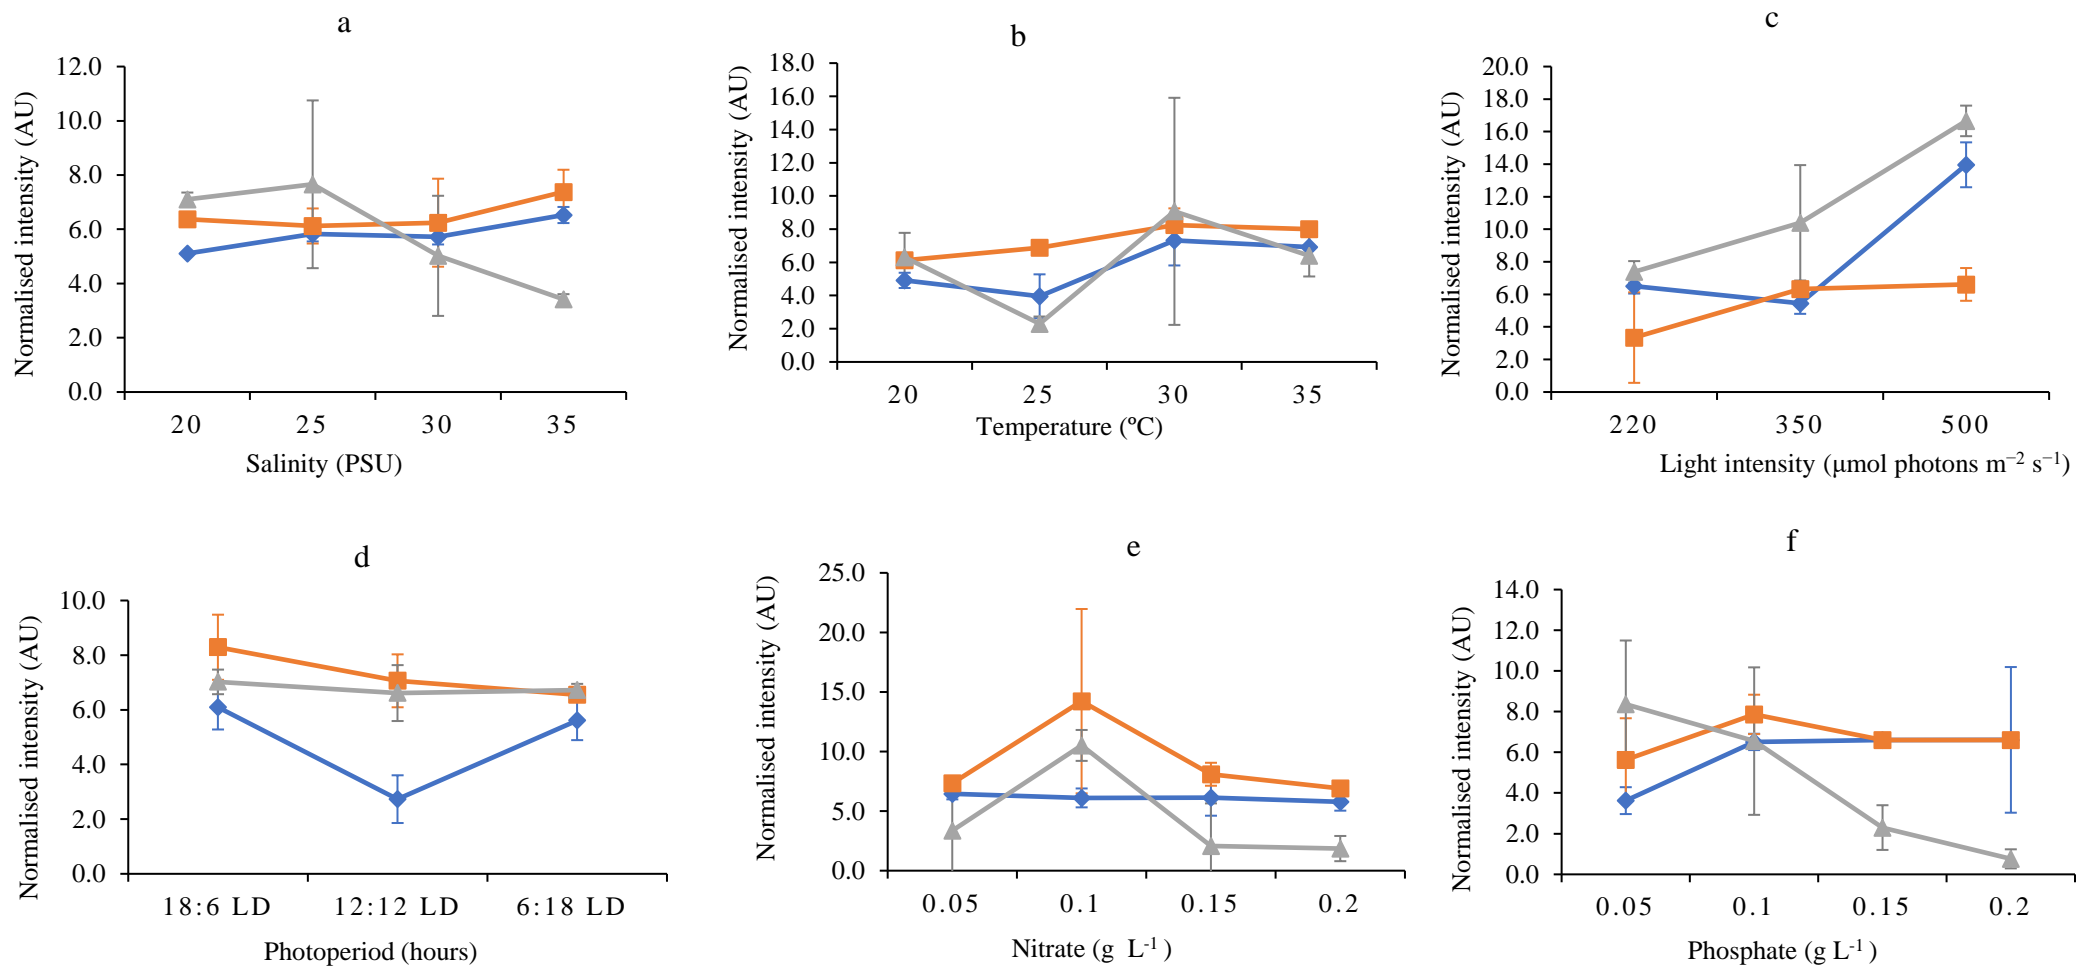

Figure S17. Fluctuation of hypotaurine in vegetative, determination and differentiation phase with respect to variables of a. Salinity, b. Temperature, c. Light Intensity, d. Photoperiod. e. Nitrate f. Phosphate.

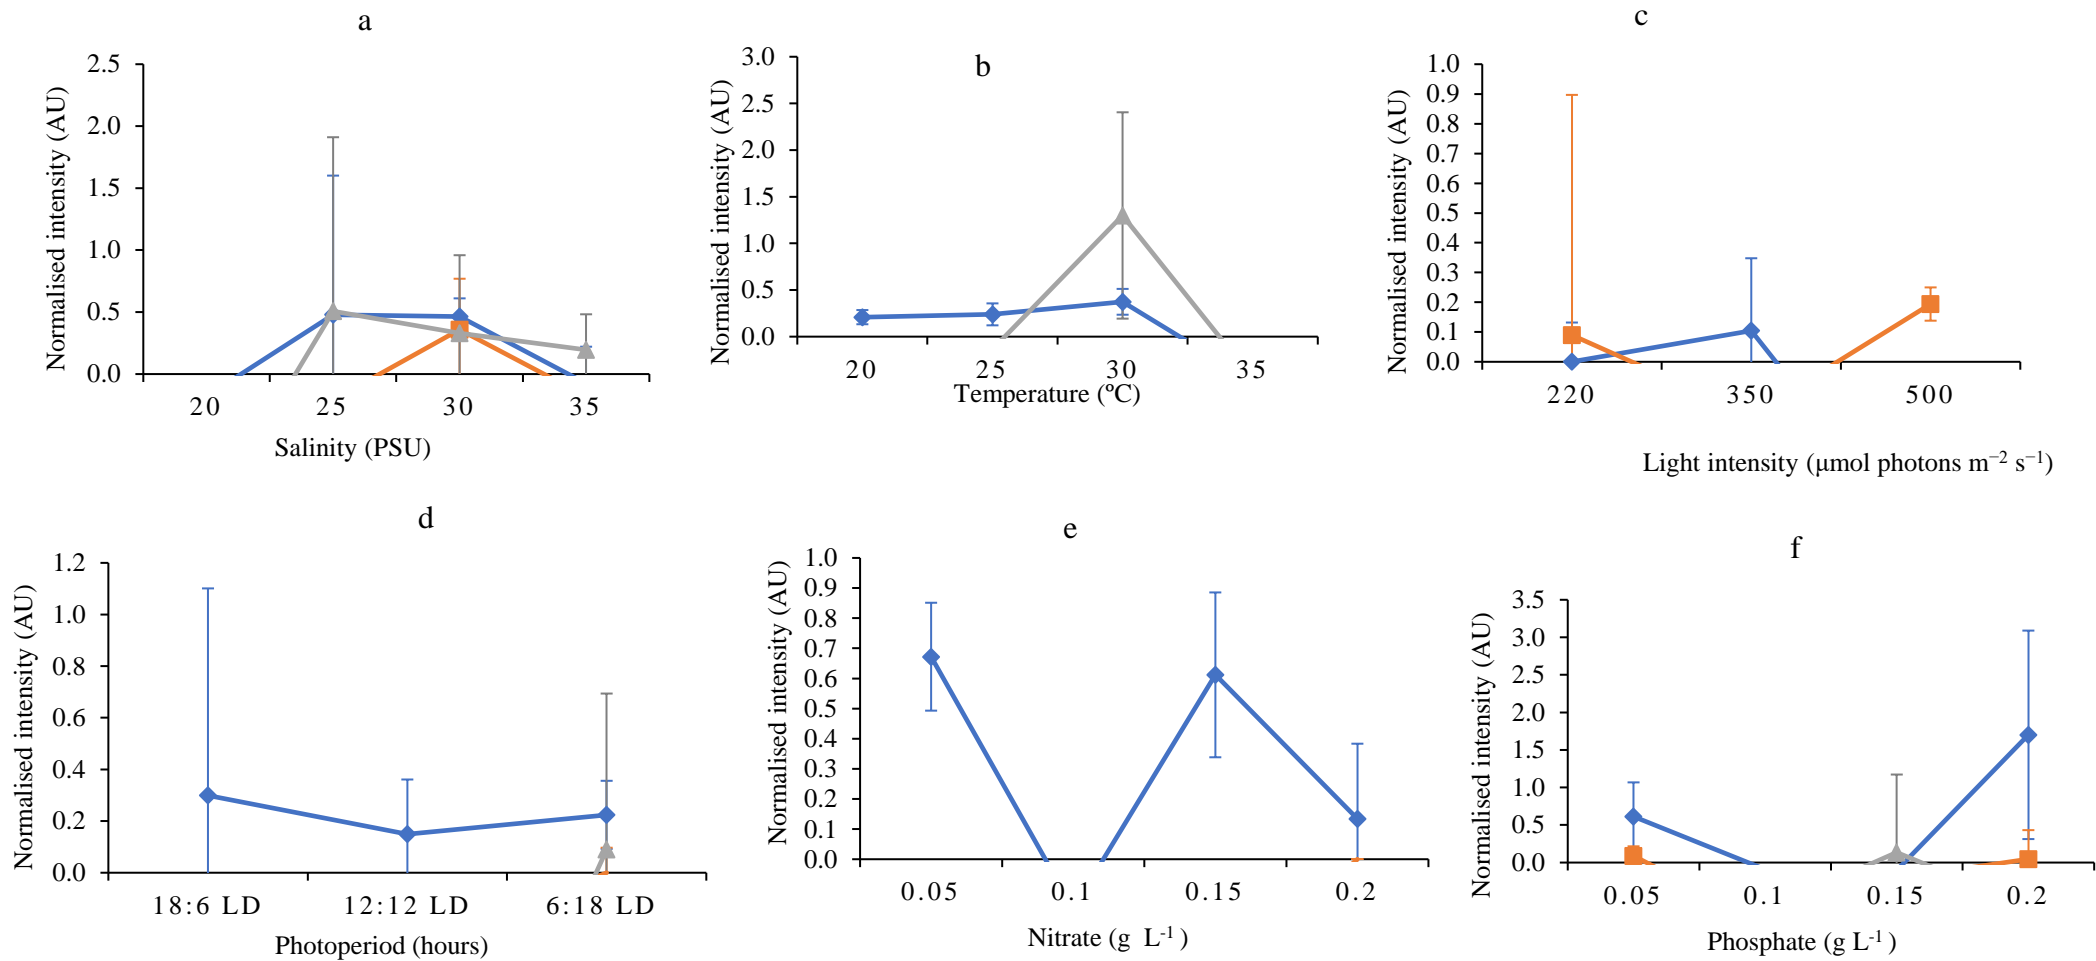

Figure S18. Fluctuation of triethanoalmine in vegetative, determination and differentiation phase with respect to variables of a. Salinity, b. Temperature, c. Light Intensity, d. Photoperiod. e. Nitrate f. Phosphate. (Values of zero implies below detection level)

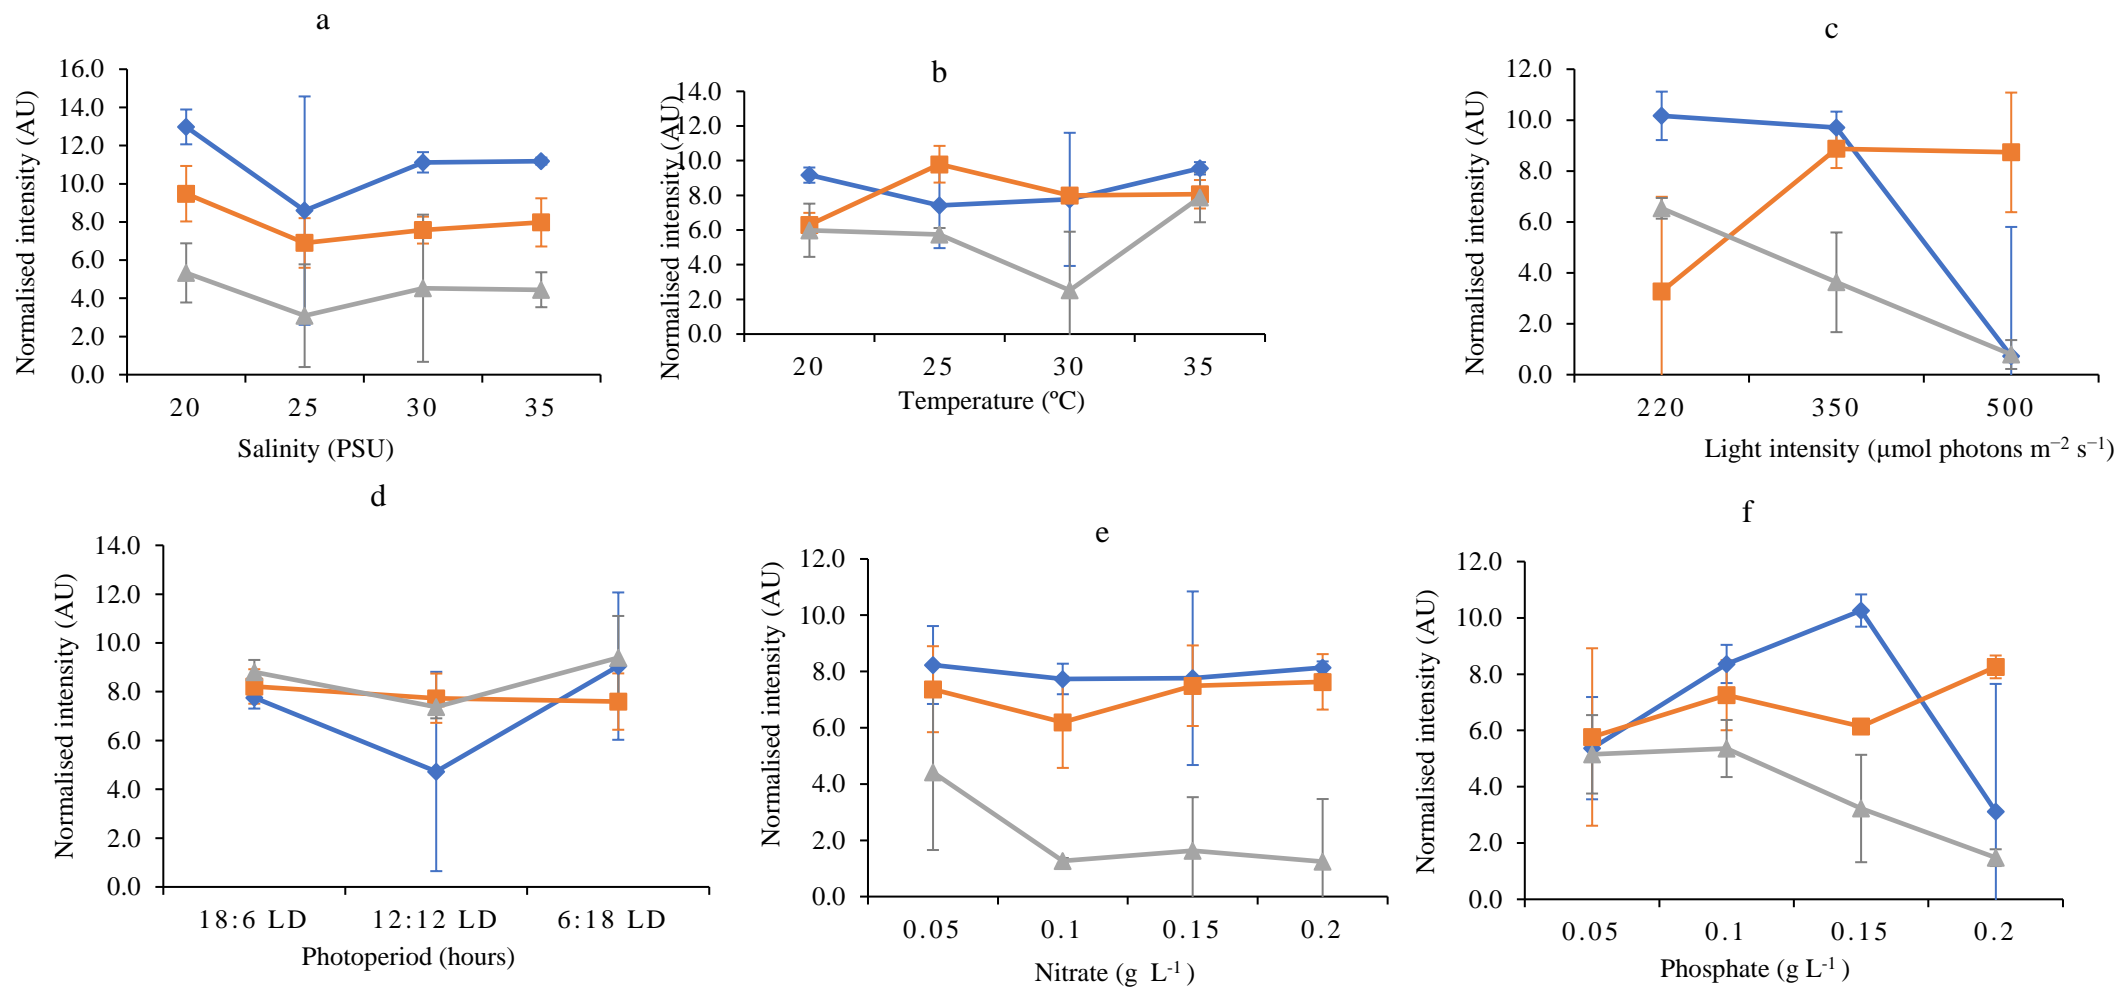

Figure S19. Fluctuation of betain in vegetative, determination and differentiation phase with respect to variables of a. Salinity, b. Temperature, c. Light Intensity, d. Photoperiod. e. Nitrate f. Phosphate.



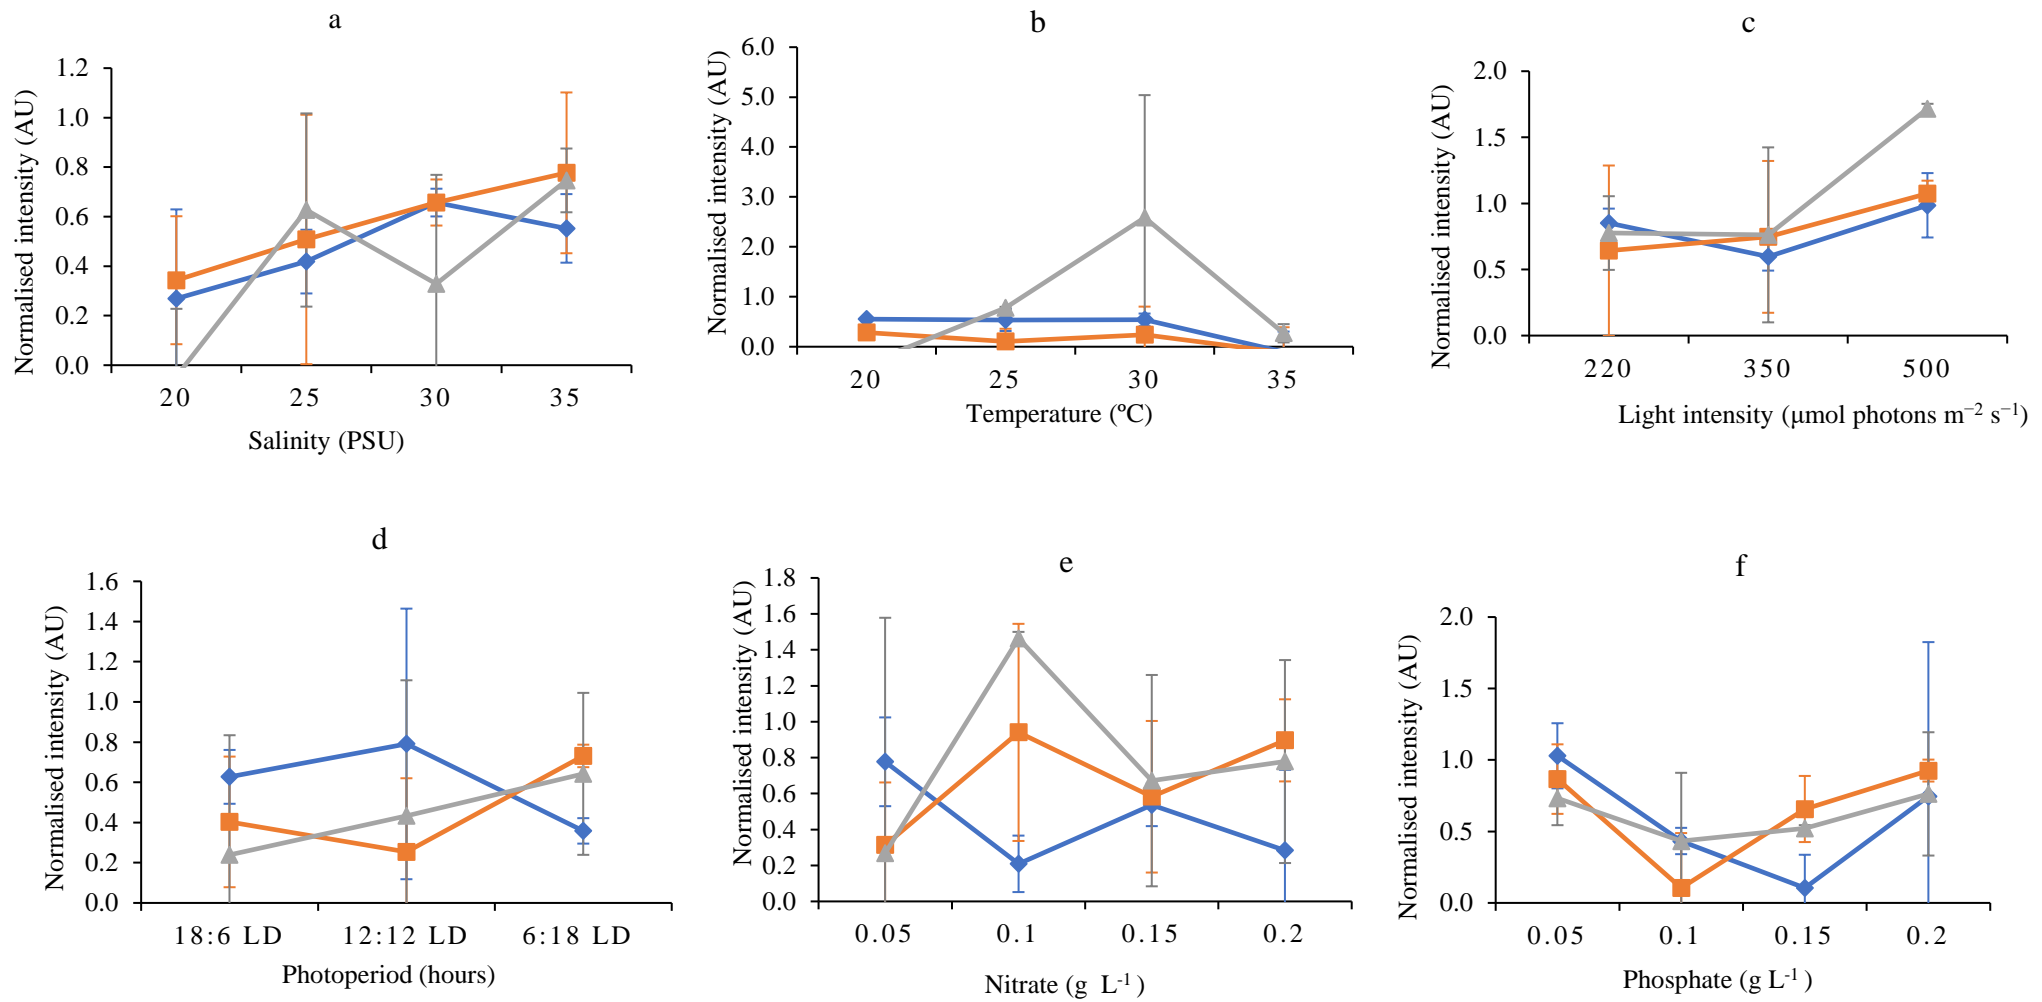

Figure S20. Fluctuation of Isethionic in vegetative, determination and differentiation phase with respect to variables of a. Salinity, b. Temperature, c. Light Intensity, d. Photoperiod. e. Nitrate f. Phosphate

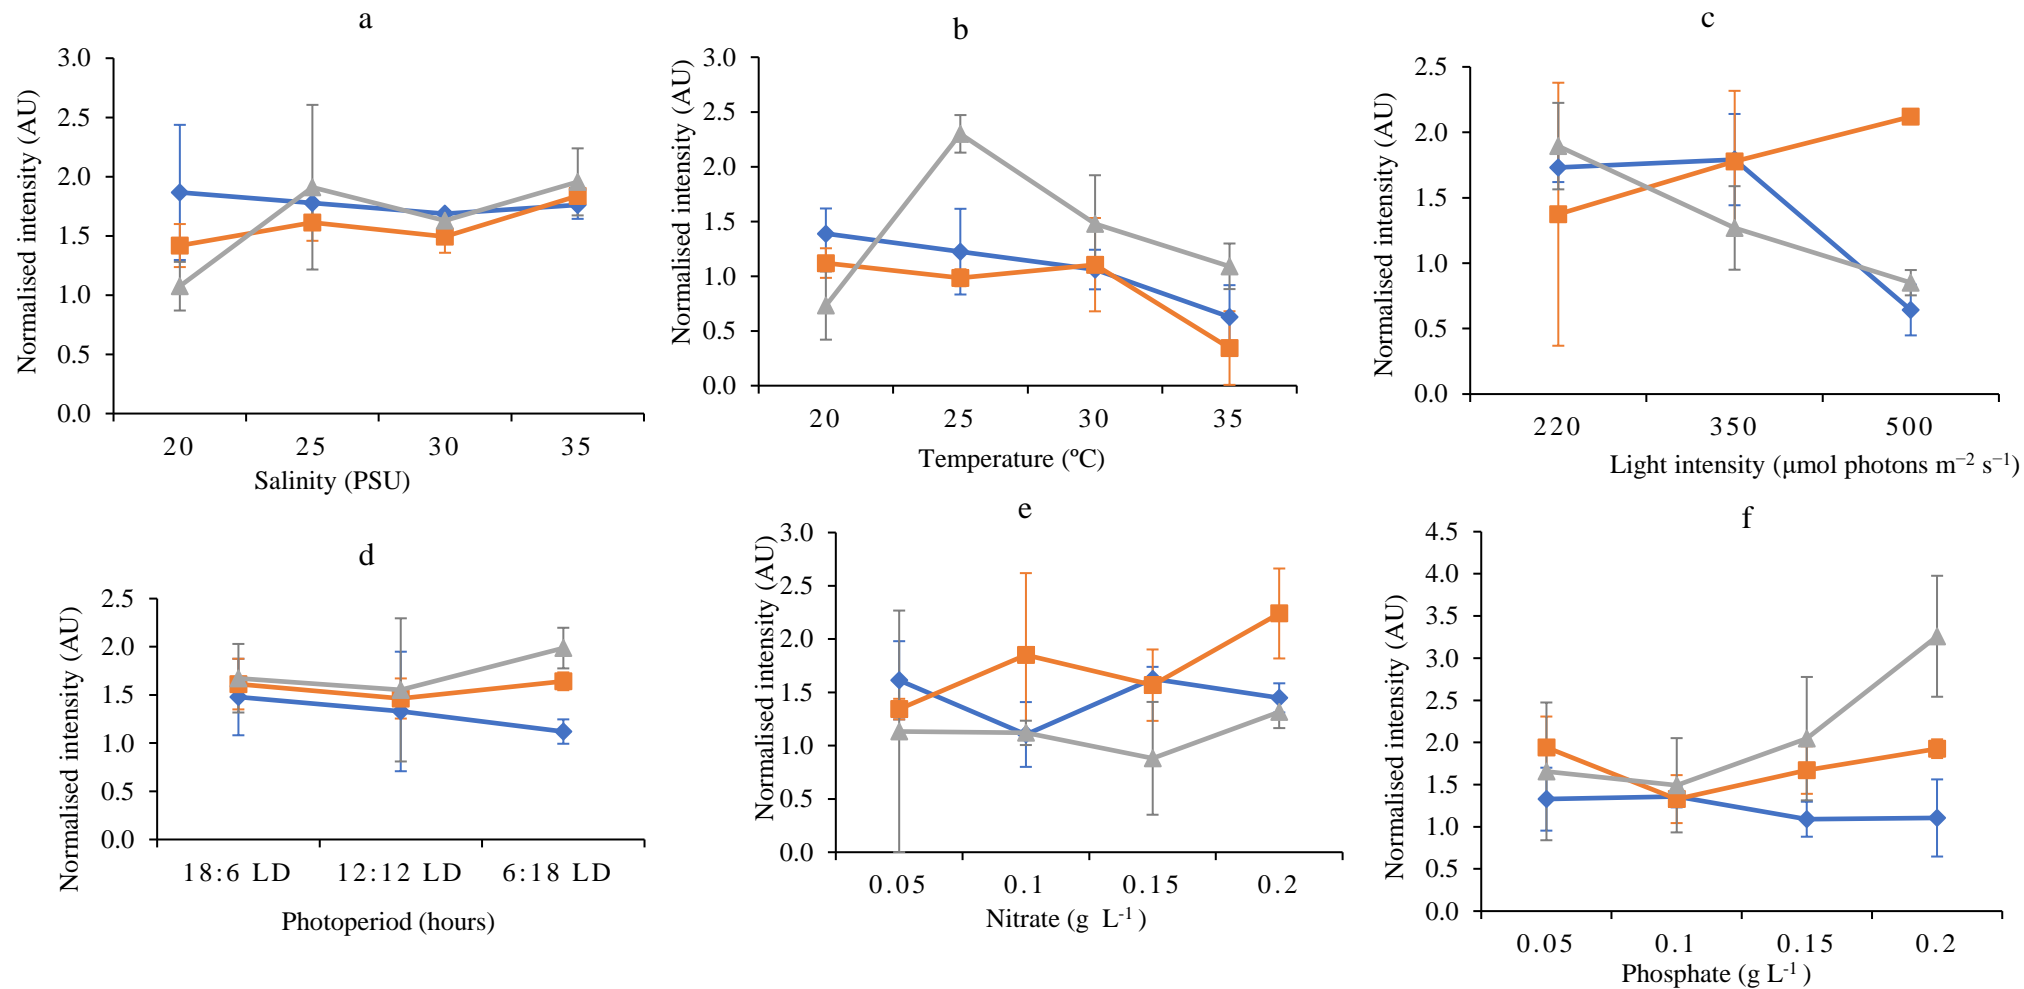

Figure S21. Fluctuation of Creatinine in vegetative, determination and differentiation phase with respect to variables of a. Salinity, b. Temperature, c. Light Intensity, d. Photoperiod. e. Nitrate f. Phosphate

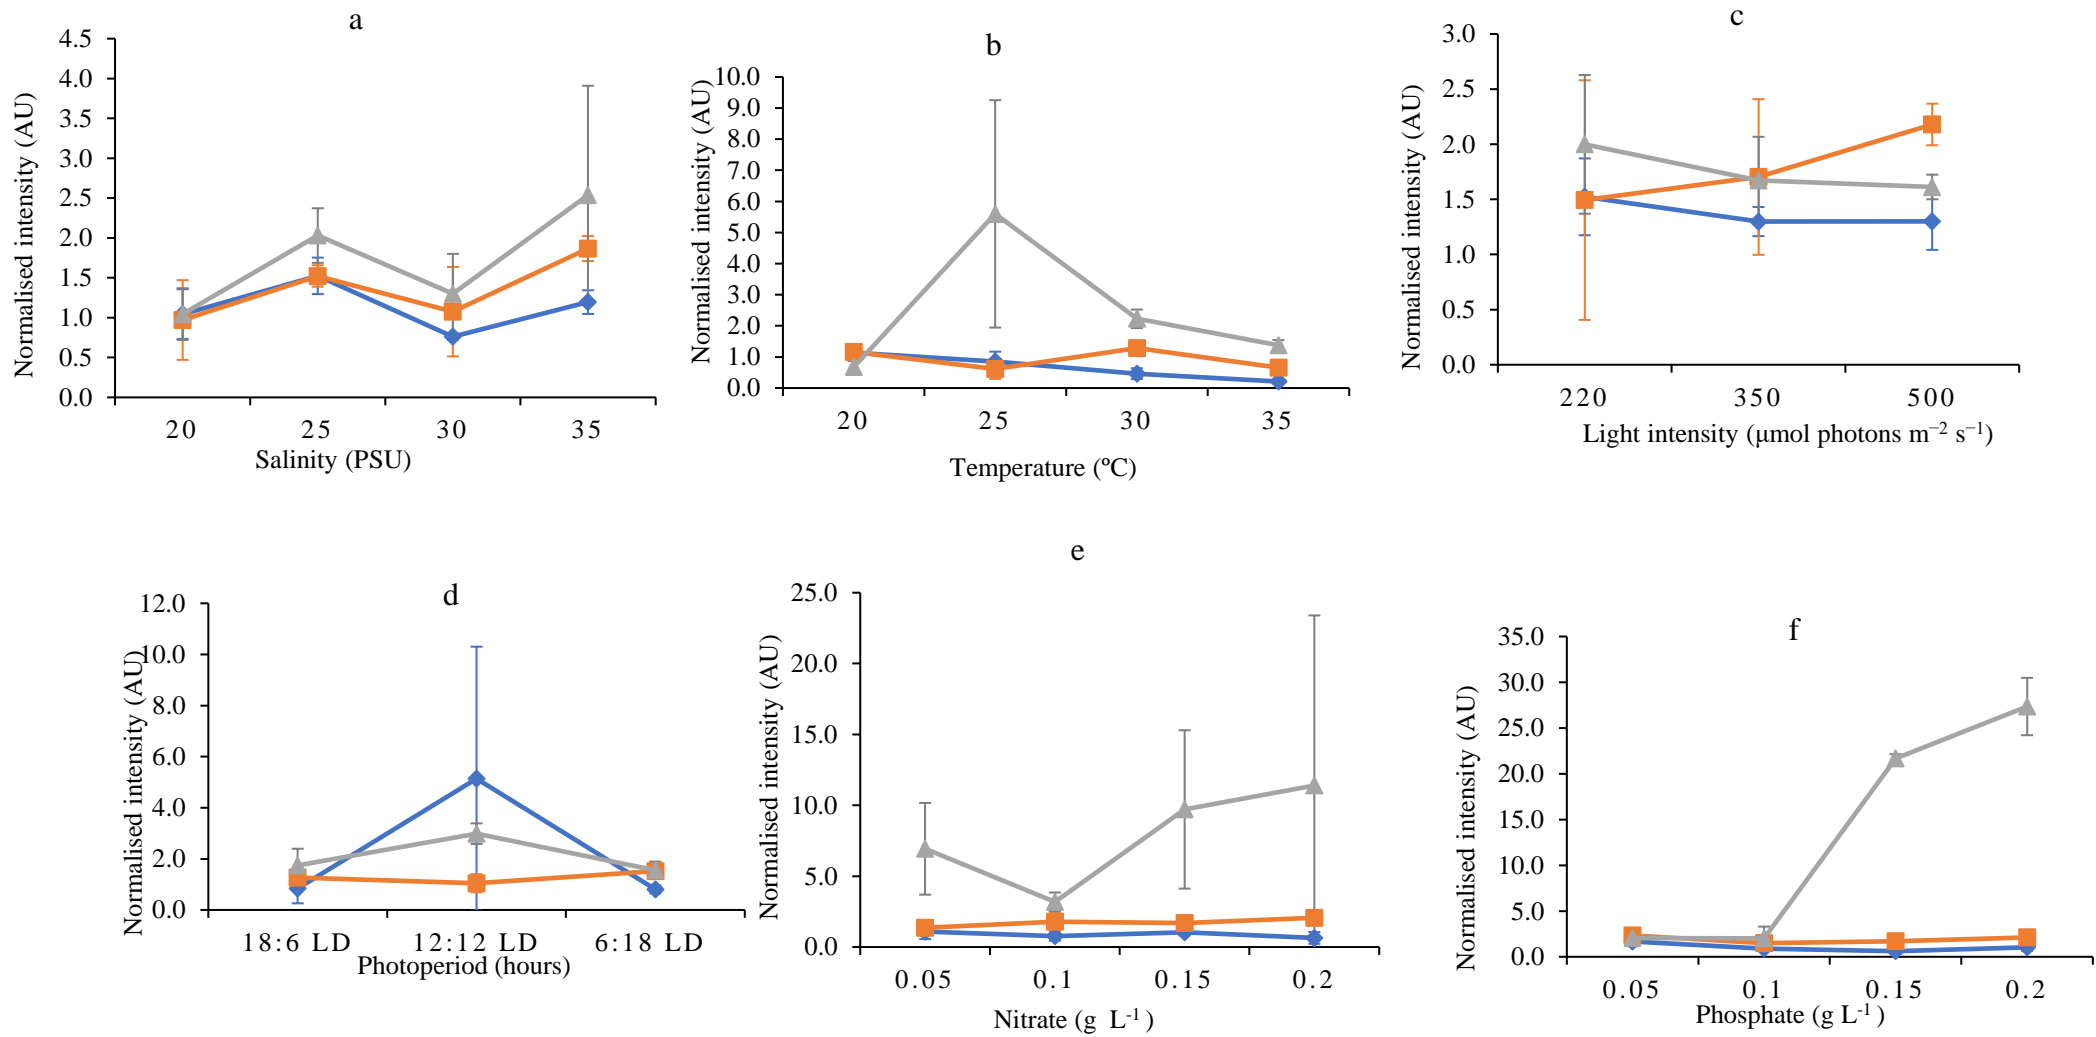

Figure S22. Fluctuation of GABA in vegetative, determination and differentiation phase with respect to variables of a. Salinity, b. Temperature, c. Light Intensity, d. Photoperiod. e. Nitrate f. Phosphate

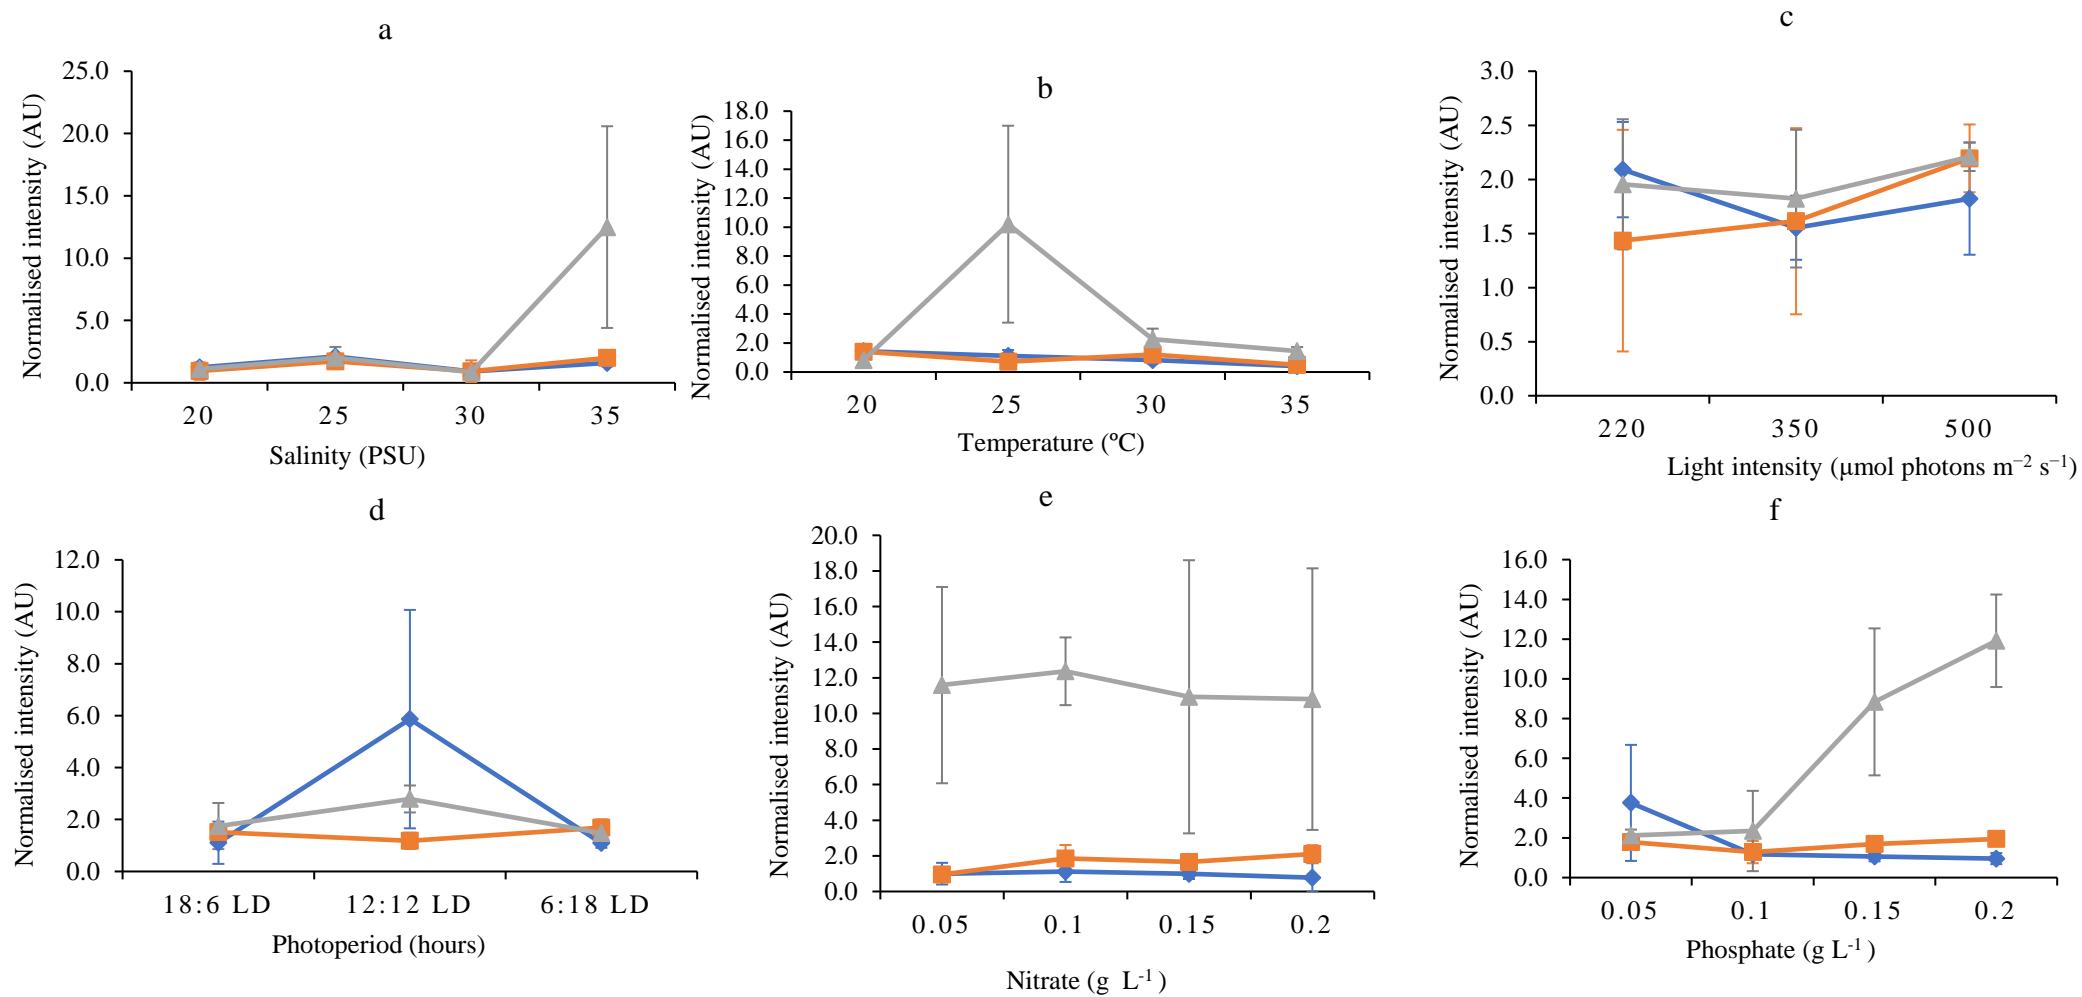

Figure S23. Fluctuation of cysteine in vegetative, determination and differentiation phase with respect to variables of a. Salinity, b. Temperature, c. Light Intensity, d. Photoperiod. e. Nitrate f. Phosphate

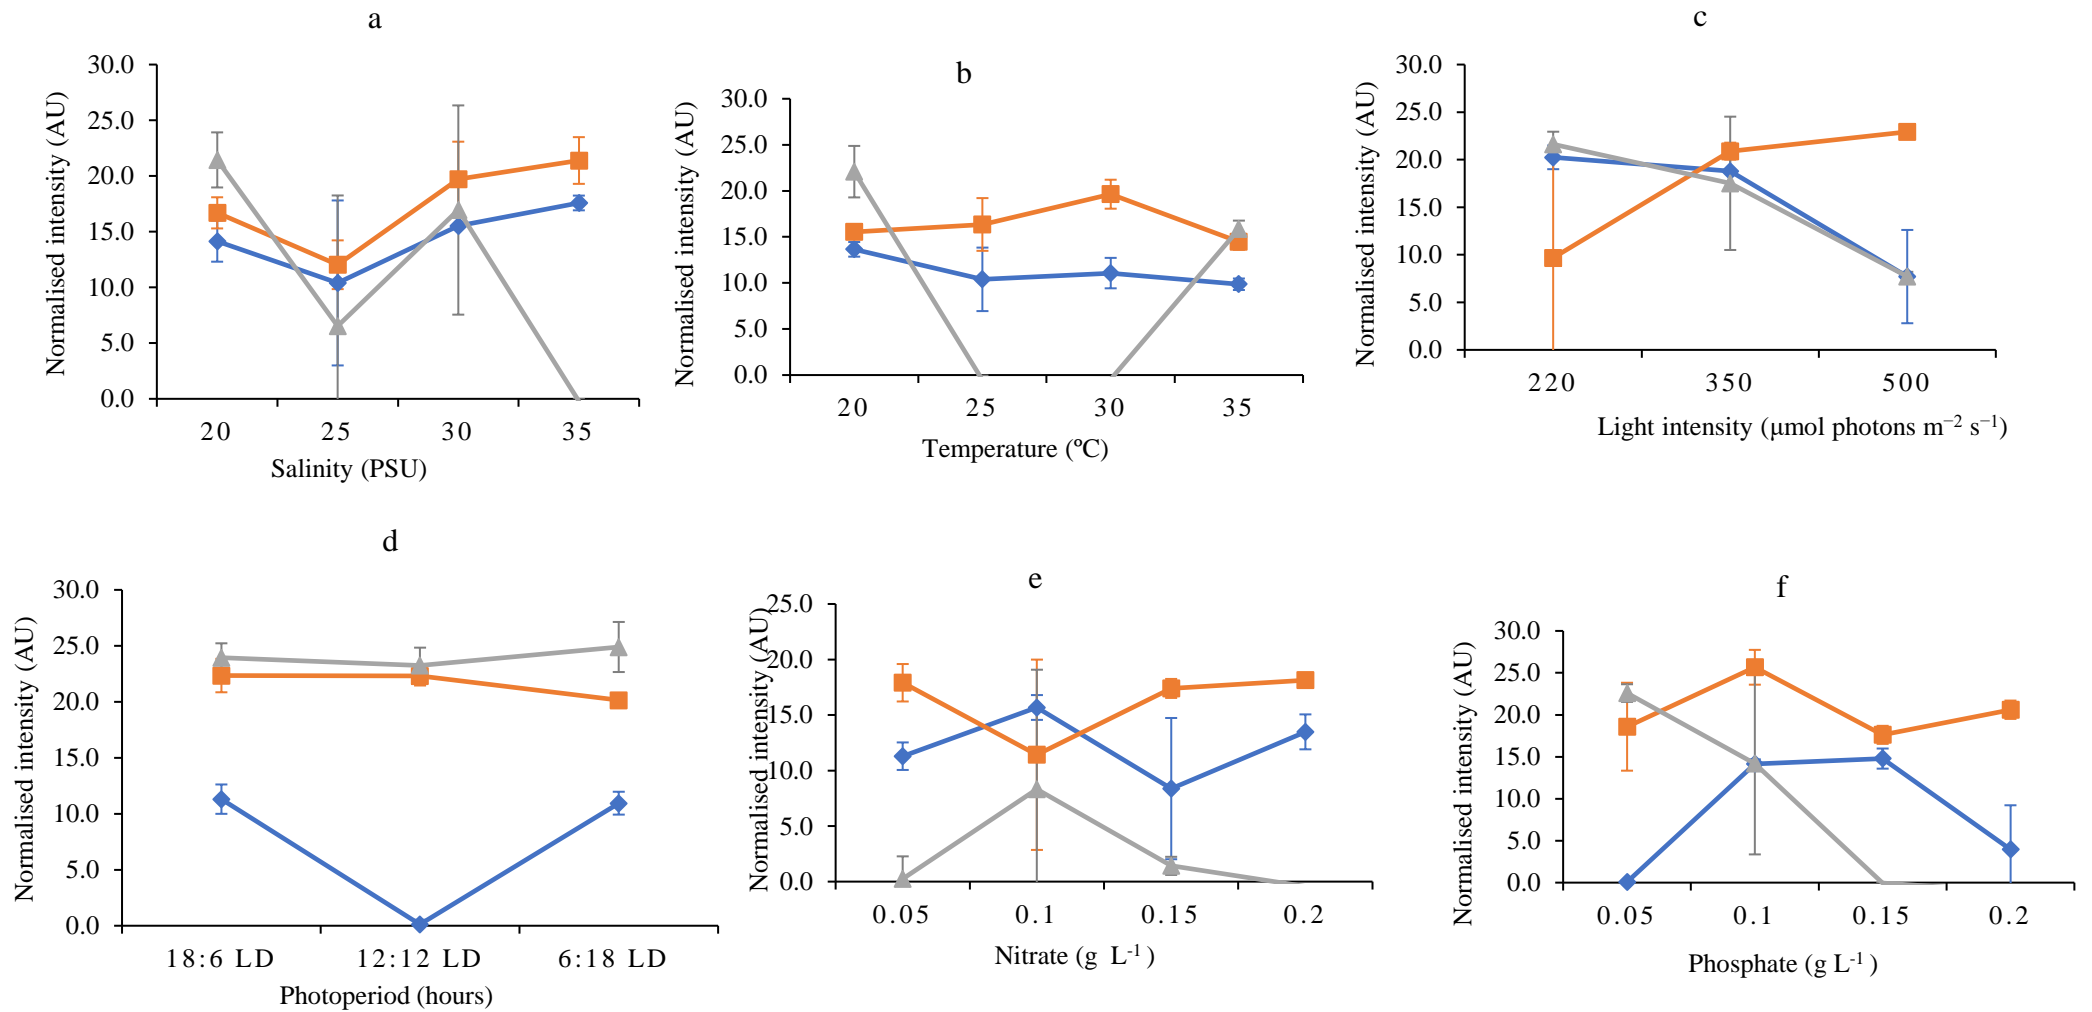

Figure S24. Fluctuation of malic acid in vegetative, determination and differentiation phase with respect to variables of a. Salinity, b. Temperature, c. Light Intensity, d. Photoperiod. e. Nitrate f. Phosphate. (Values of zero implies below detection level)

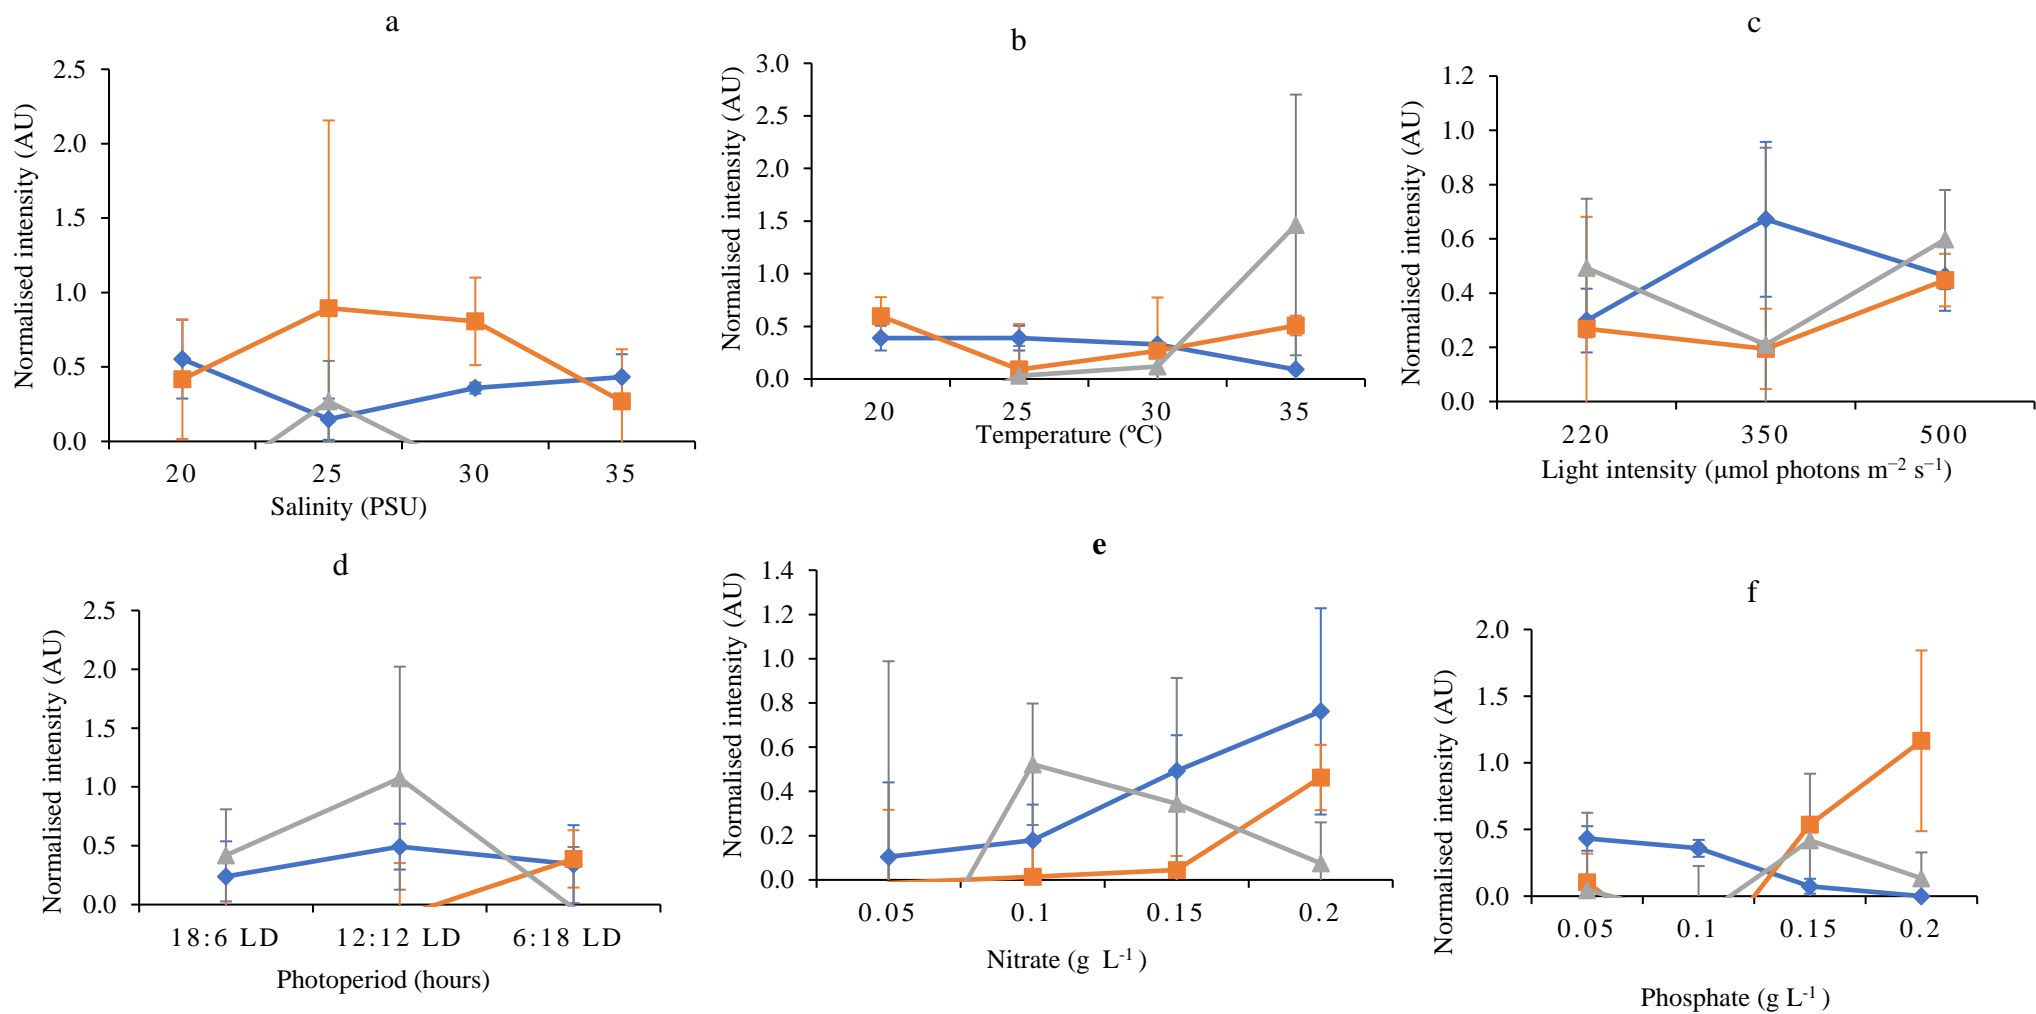

Figure S25. Fluctuation of Succinic acid in vegetative, determination and differentiation phase with respect to variables of a. Salinity, b. Temperature, c. Light Intensity, d. Photoperiod. e. Nitrate f. Phosphate. (Values of zero implies below detection level)

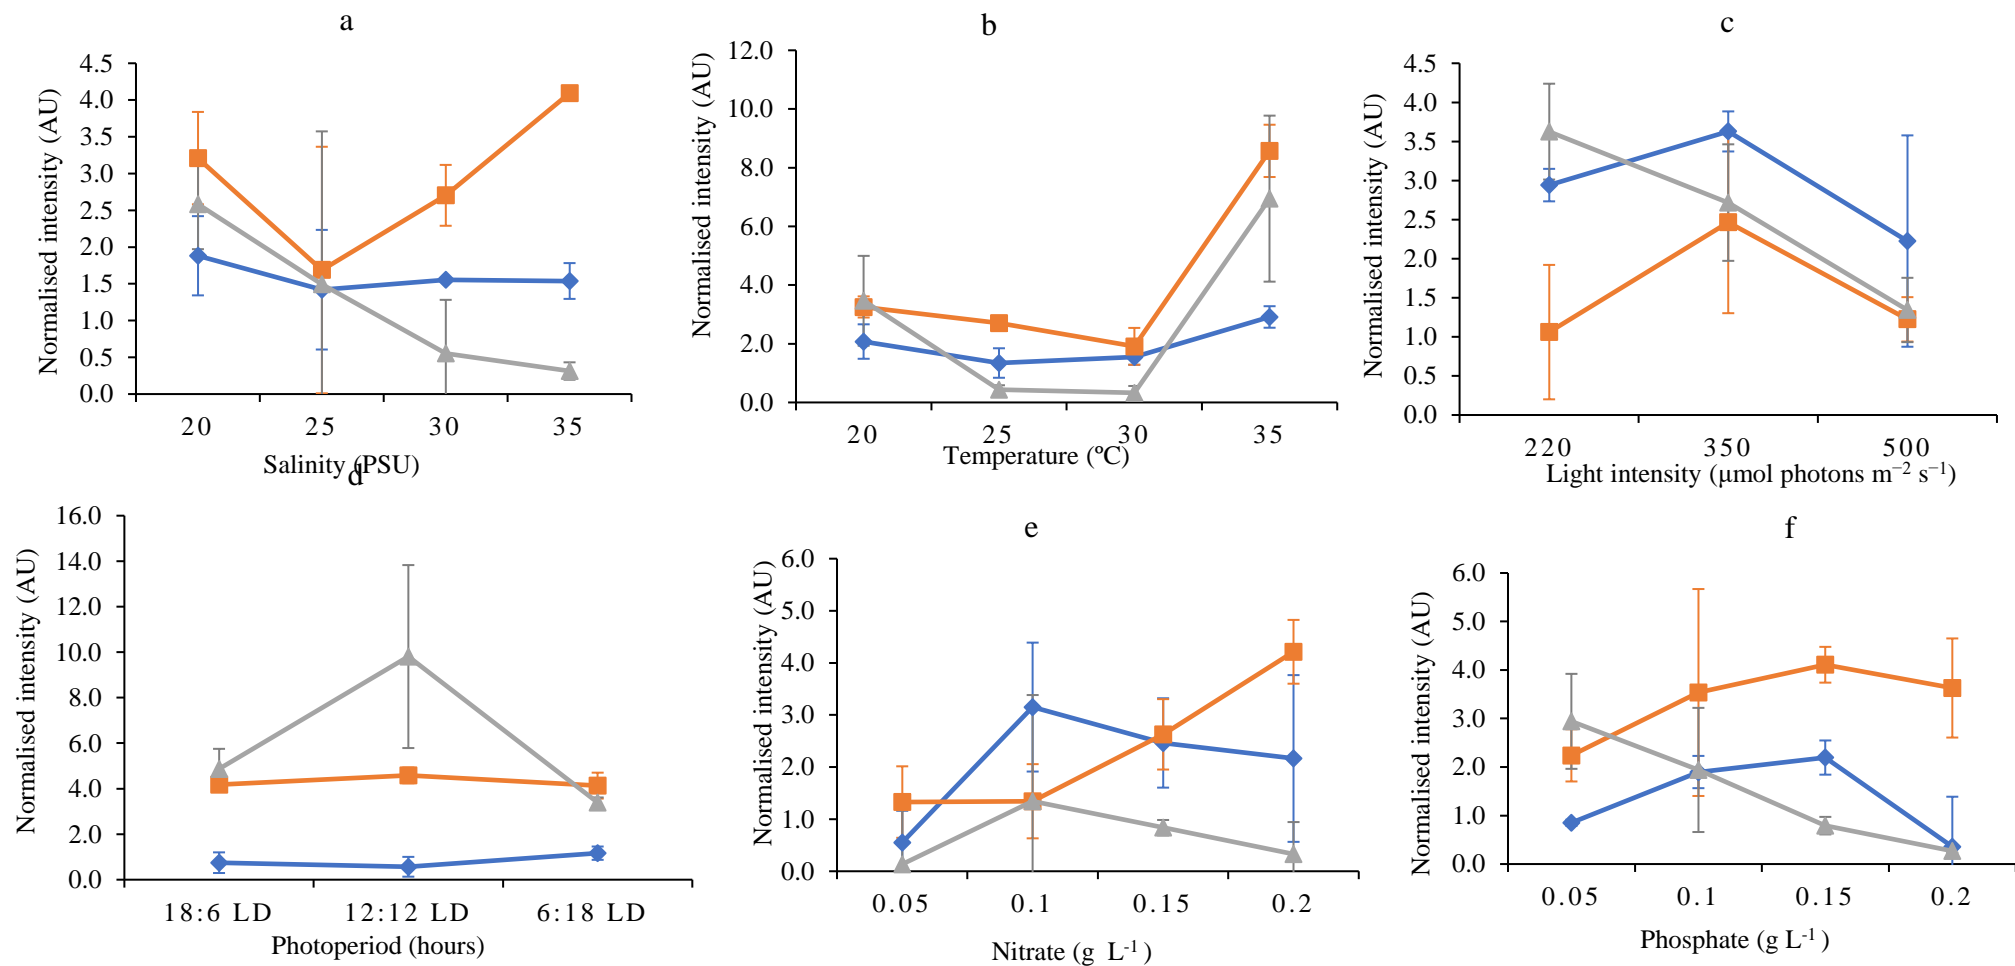

Figure S26. Fluctuation of a-ketoglutaric acid in vegetative, determination and differentiation phase with respect to variables of a. Salinity, b. Temperature, c. Light Intensity, d. Photoperiod. e. Nitrate f. Phosphate

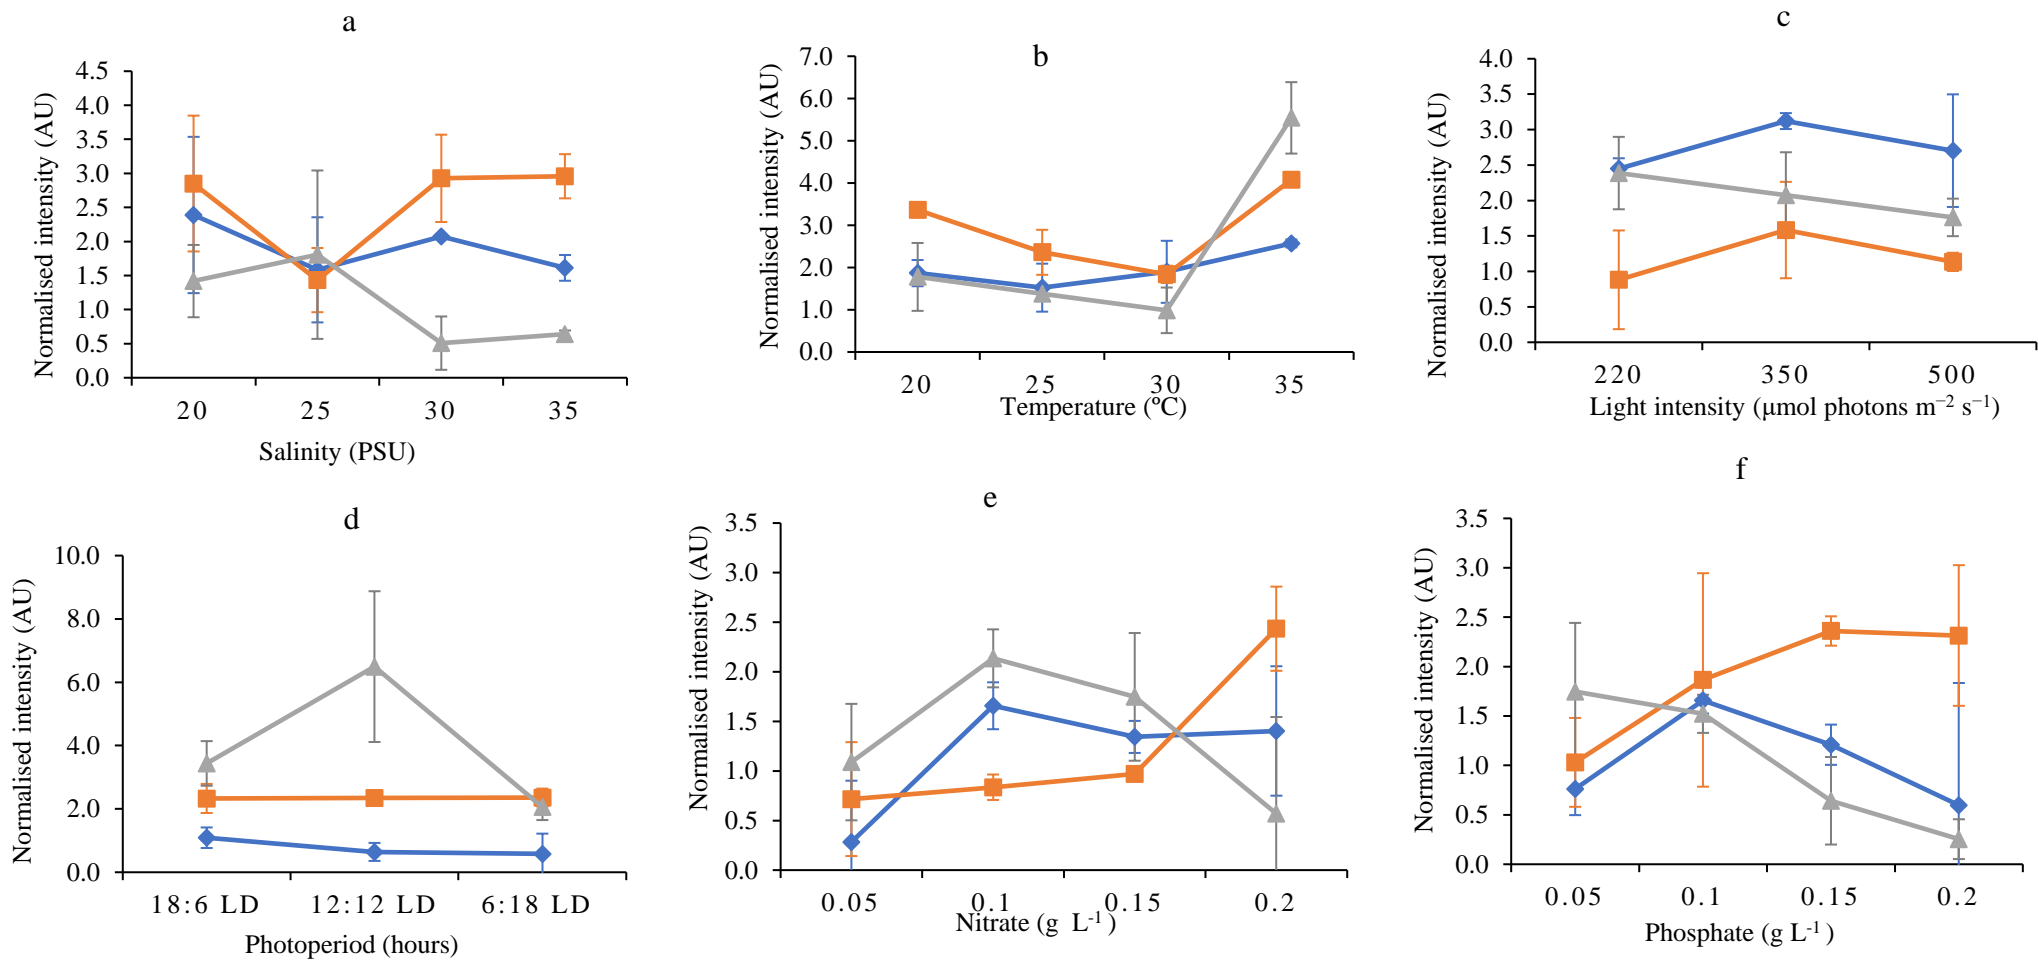

Figure S27. Fluctuation of glutamic acid in vegetative, determination and differentiation phase with respect to variables of a. Salinity, b. Temperature, c. Light Intensity, d. Photoperiod. e. Nitrate f. Phosphate



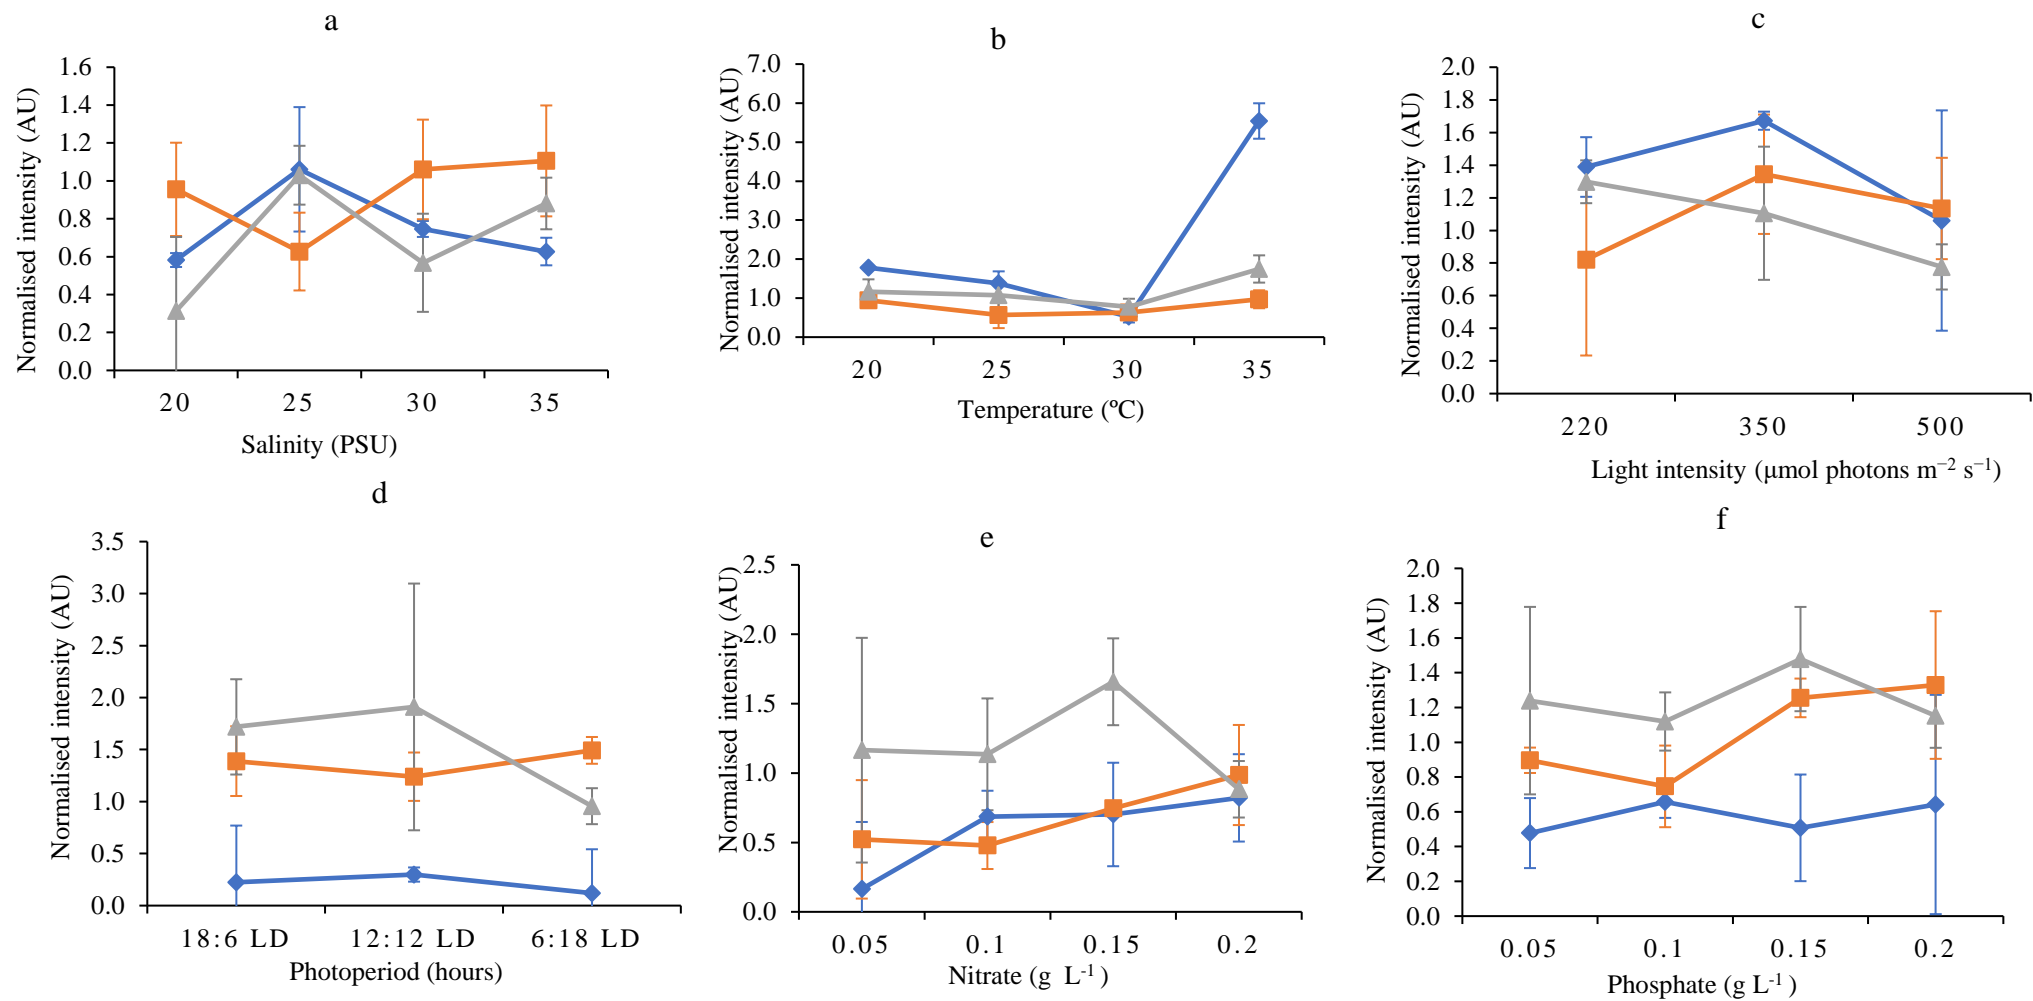

Figure S28. Fluctuation of proline in vegetative, determination and differentiation phase with respect to variables of a. Salinity, b. Temperature, c. Light Intensity, d. Photoperiod. e. Nitrate f. Phosphate

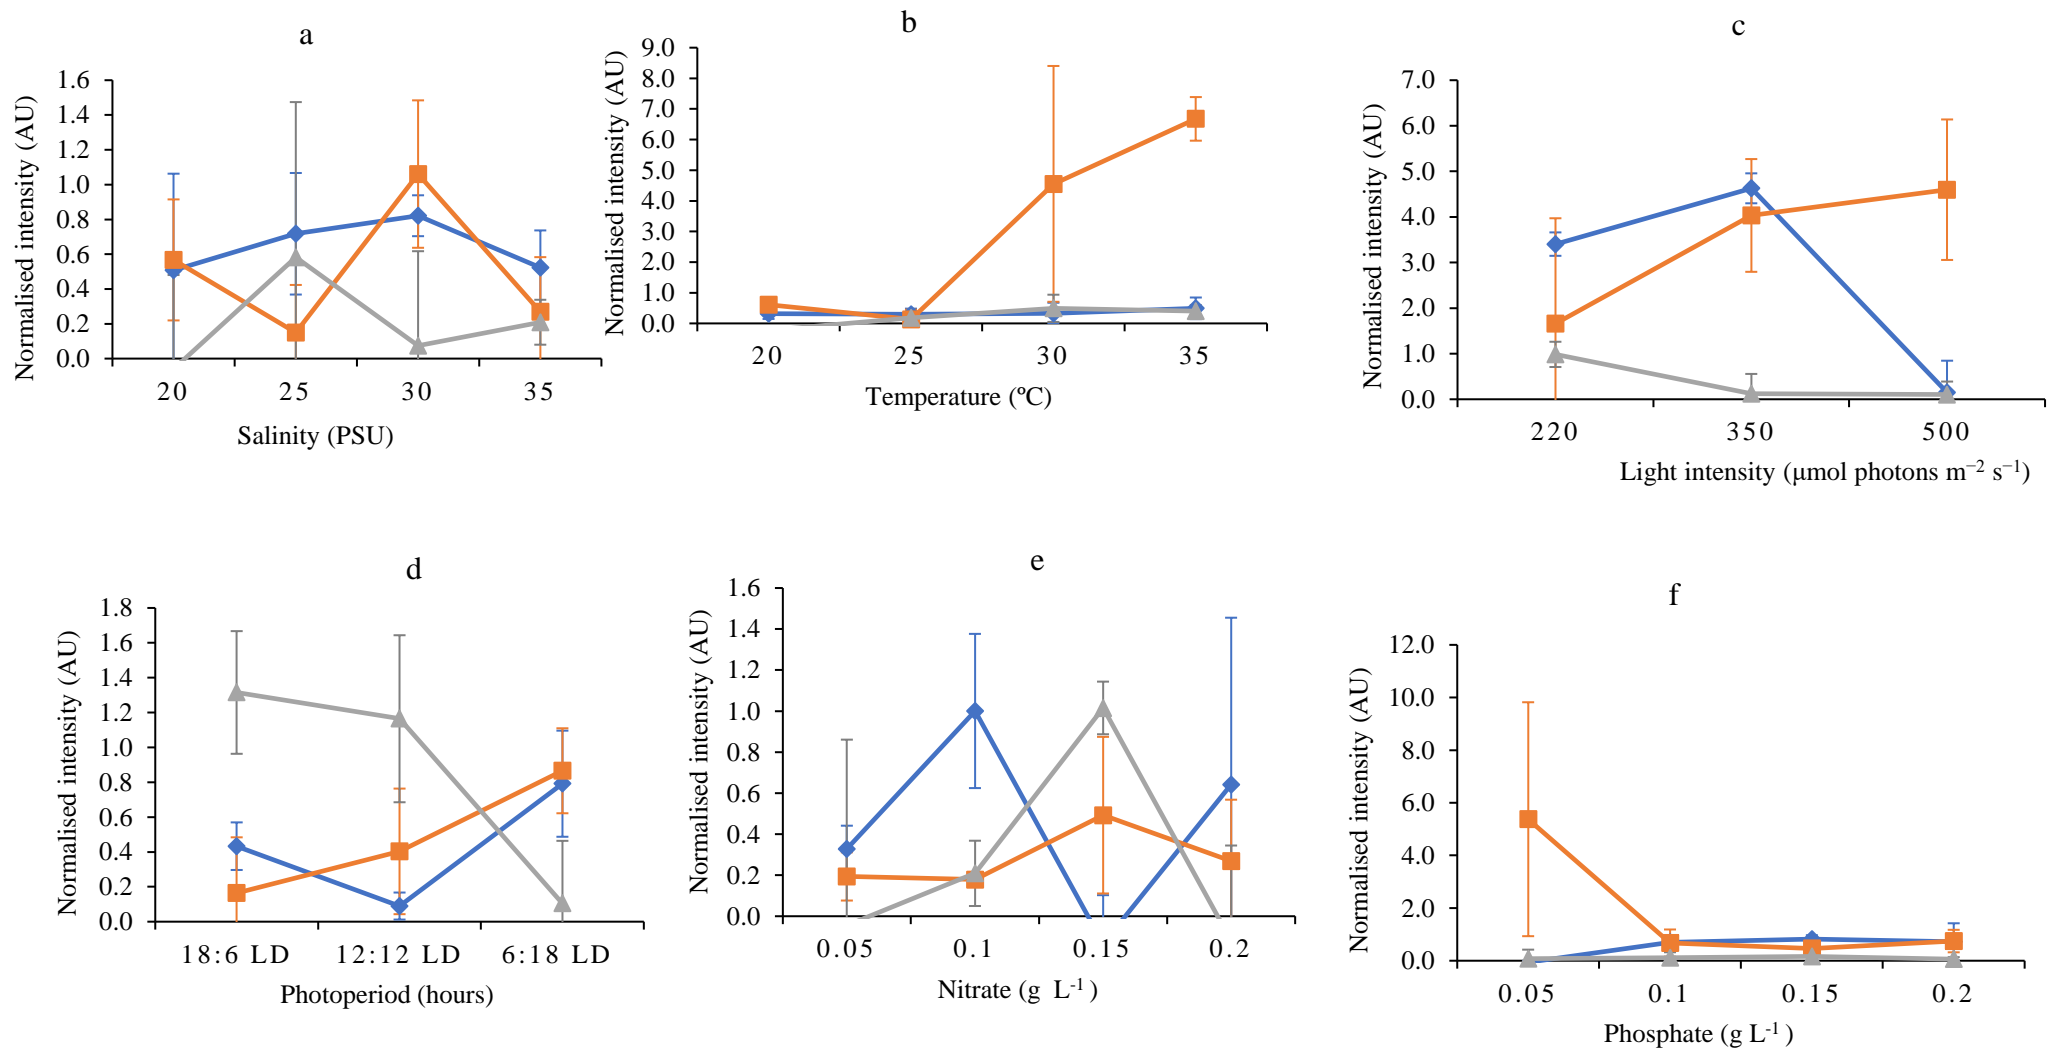

Figure S29. Fluctuation of acetate in vegetative, determination and differentiation phase with respect to variables of a. Salinity, b. Temperature, c. Light Intensity, d. Photoperiod. e. Nitrate f. Phosphate. (Values of zero implies below detection level)

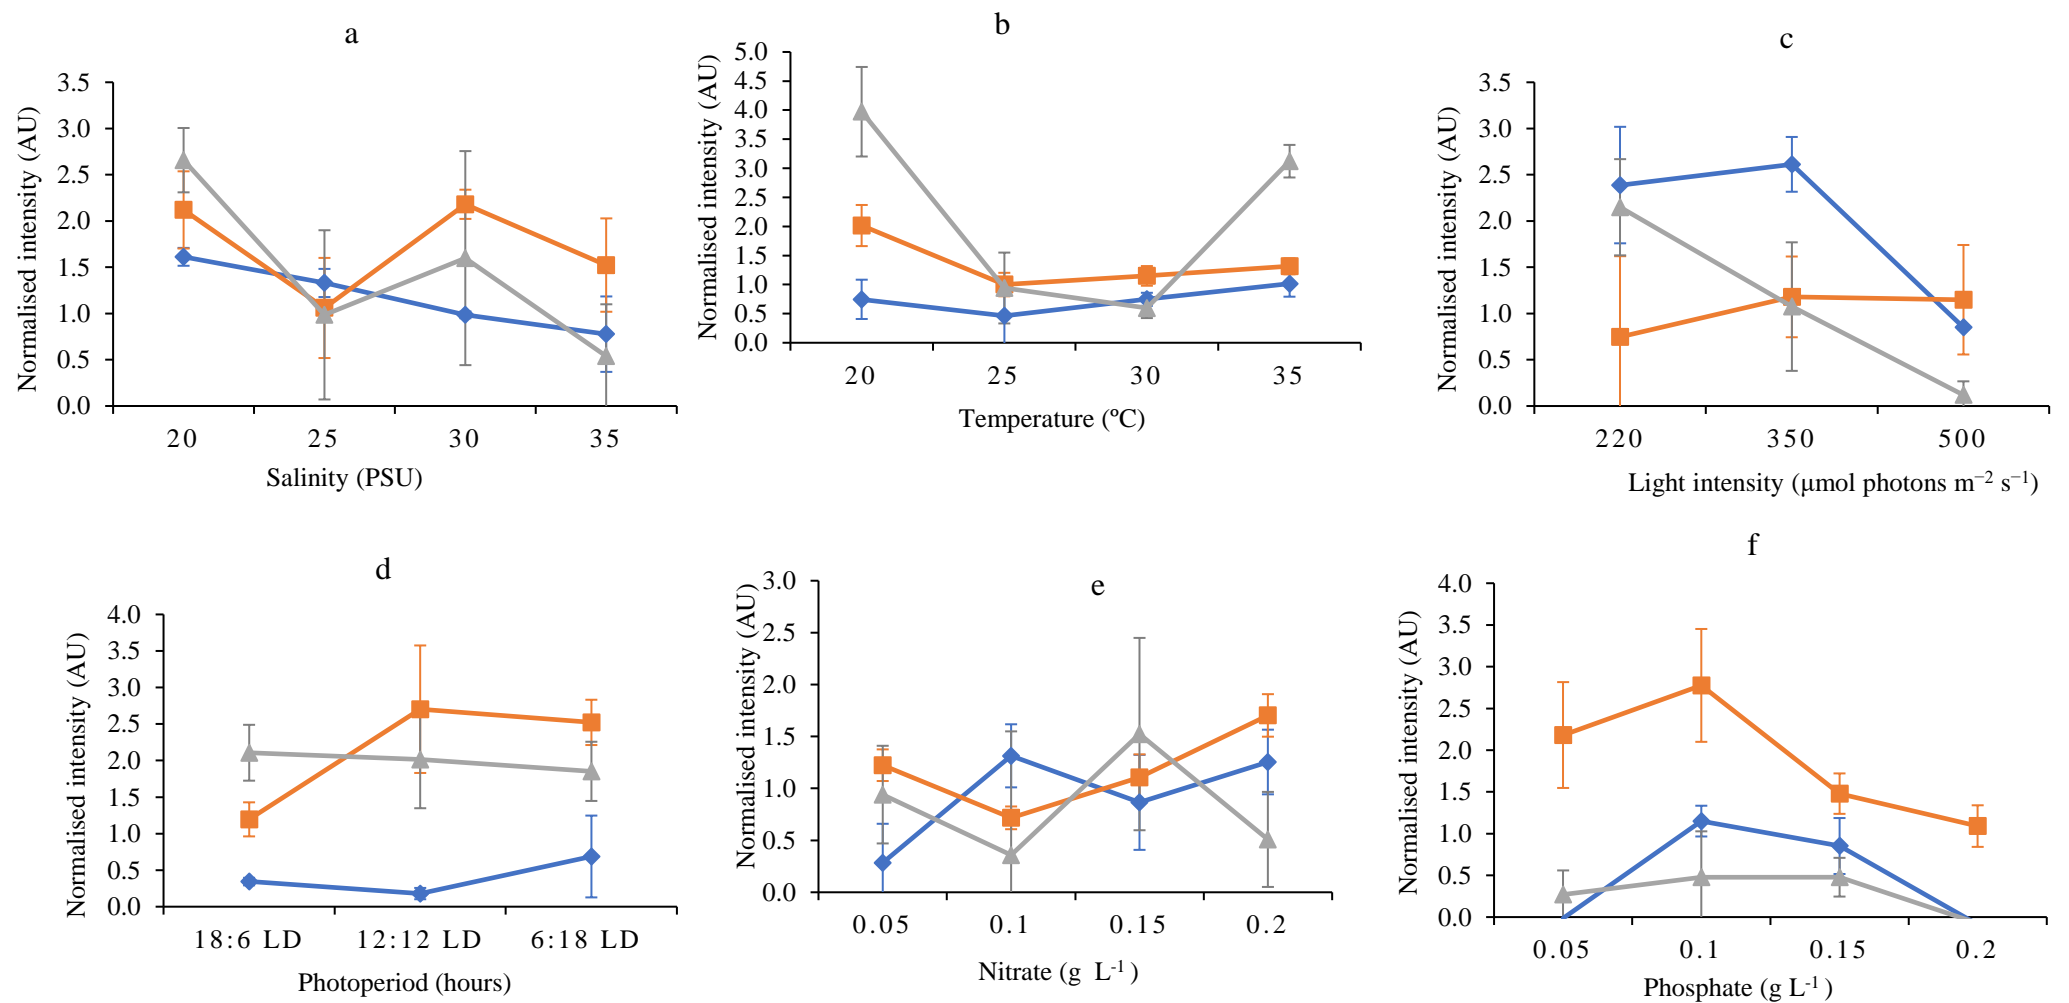

Figure S30. Fluctuation of alanine in vegetative, determination and differentiation phase with respect to variables of a. Salinity, b. Temperature, c. Light Intensity, d. Photoperiod. e. Nitrate f. Phosphate. (Values of zero implies below detection level)

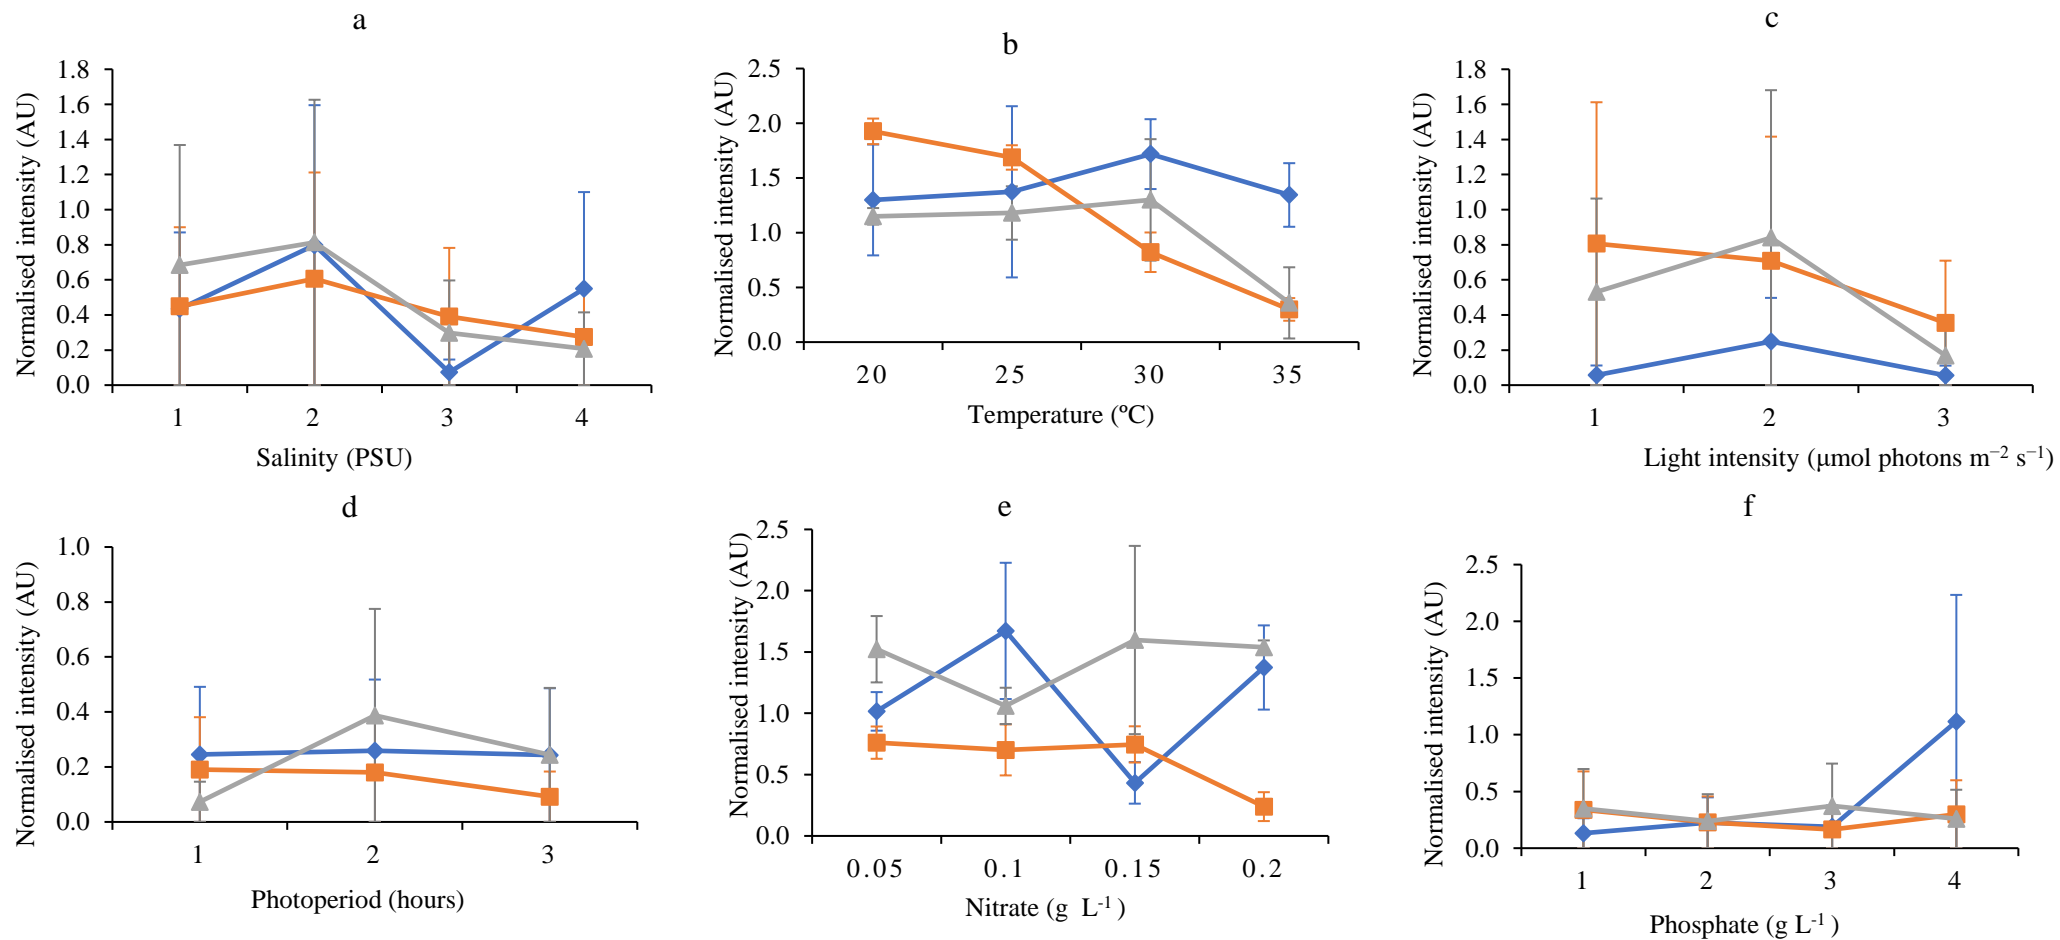

Figure S31. Fluctuation of threonine in vegetative, determination and differentiation phase with respect to variables of a. Salinity, b. Temperature, c. Light Intensity, d. Photoperiod. e. Nitrate f. Phosphate.

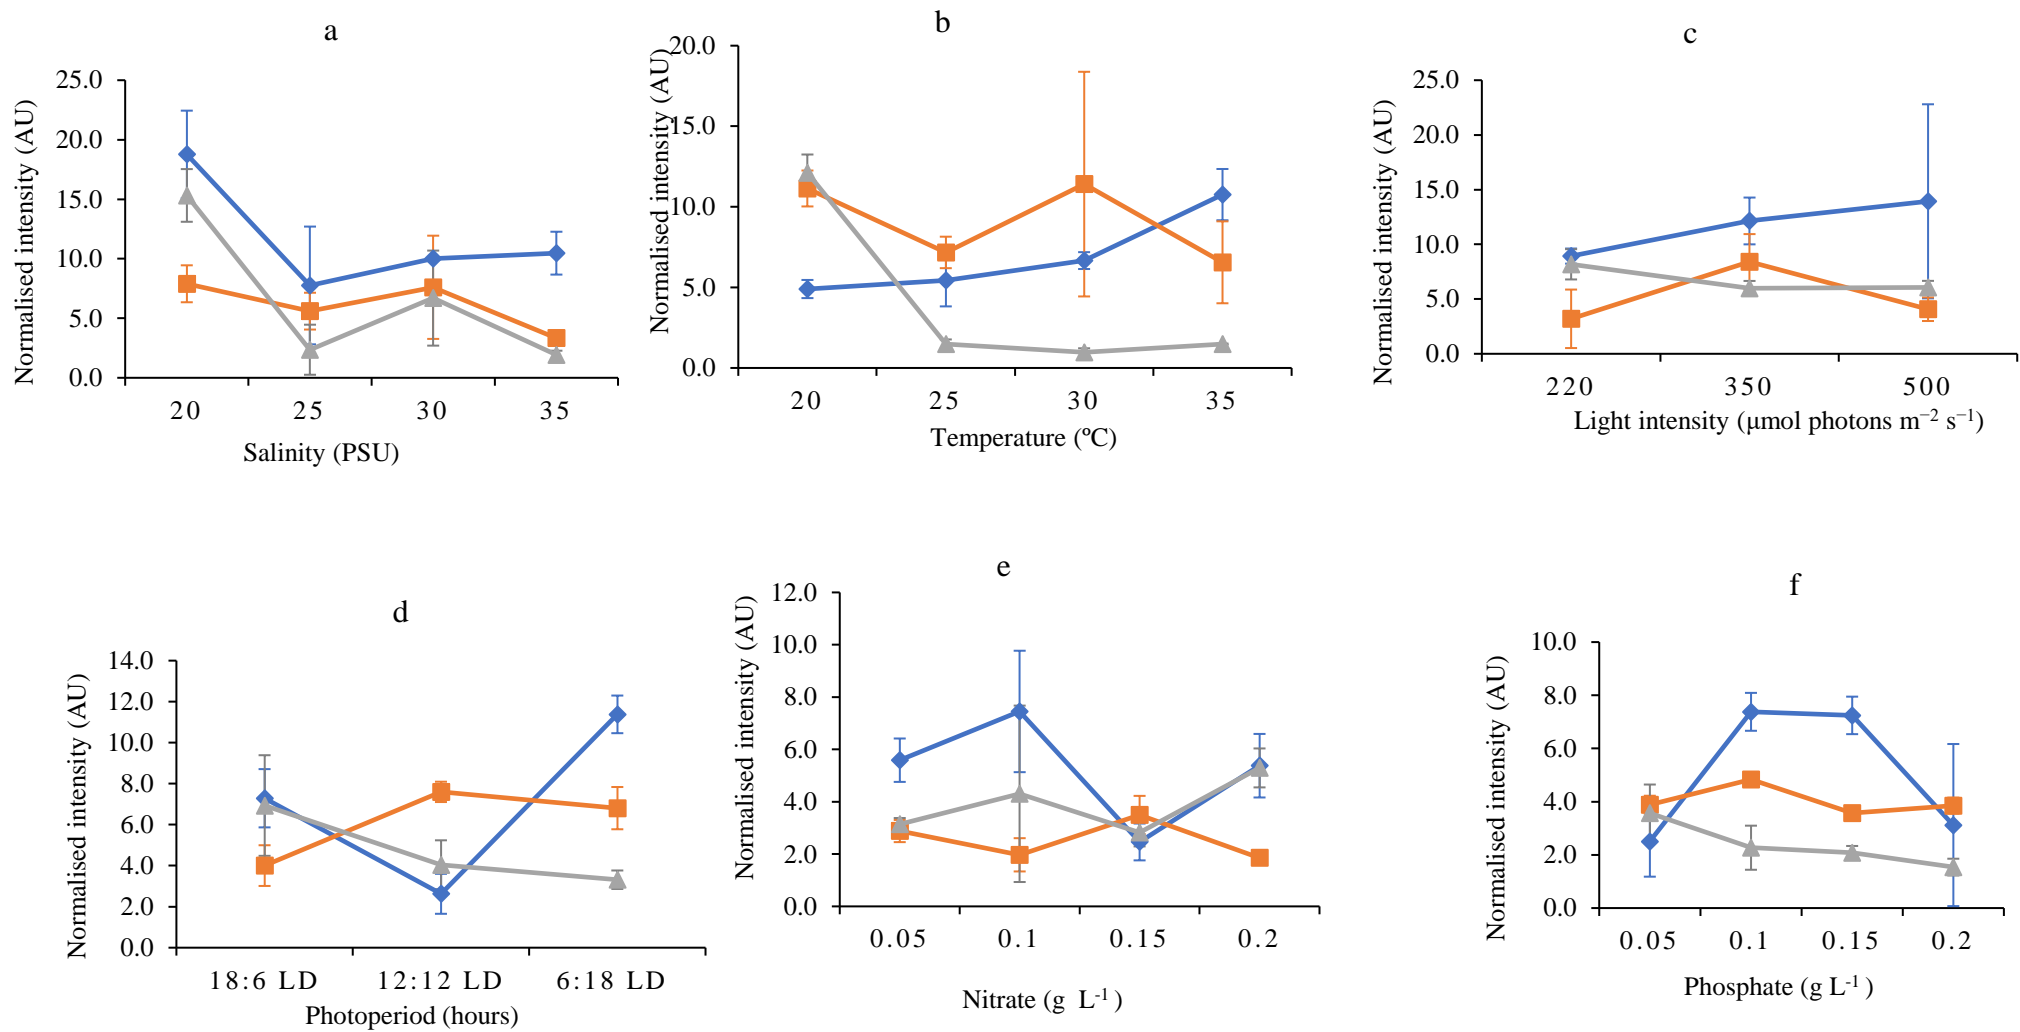

Figure S32. Fluctuation of lactate in vegetative, determination and differentiation phase with respect to variables of a. Salinity, b. Temperature, c. Light Intensity, d. Photoperiod. e. Nitrate f. Phosphate.

**Box S2: Spearman correlation between three phases in variable salinity**

In case of variable salinity positive correlation was found between metabolites in regions 3, 4, 5, 6 in all three phases whereas a negative correlation was found between metabolites in regions 8-13 and 2-8 in the determination and differentiation phase (Fig. S33, S34, S35). In case of variable salinity in vegetative phase positive correlation found between metabolites in regions 3, 4, 5 wherein 4 (middle) is having no correlation with 3 and 5 regions. Regions 7, and 13-14 showed positive correlation. Negative correlation found between metabolites region 7,8,9 (Fig. S33). In case of variable salinity in determination phase positive correlation found between metabolites from regions 2-7 wherein region 3 is poorly correlated. Region 13-14 is also positively correlated but no correlation found between regions from 8-14 and 1-7 (Fig. S34). In the differentiation phase, regions 3-5 and 12-13 are positively correlated whereas regions 3-6 had no correlation with regions 8-12. (Fig. S35).

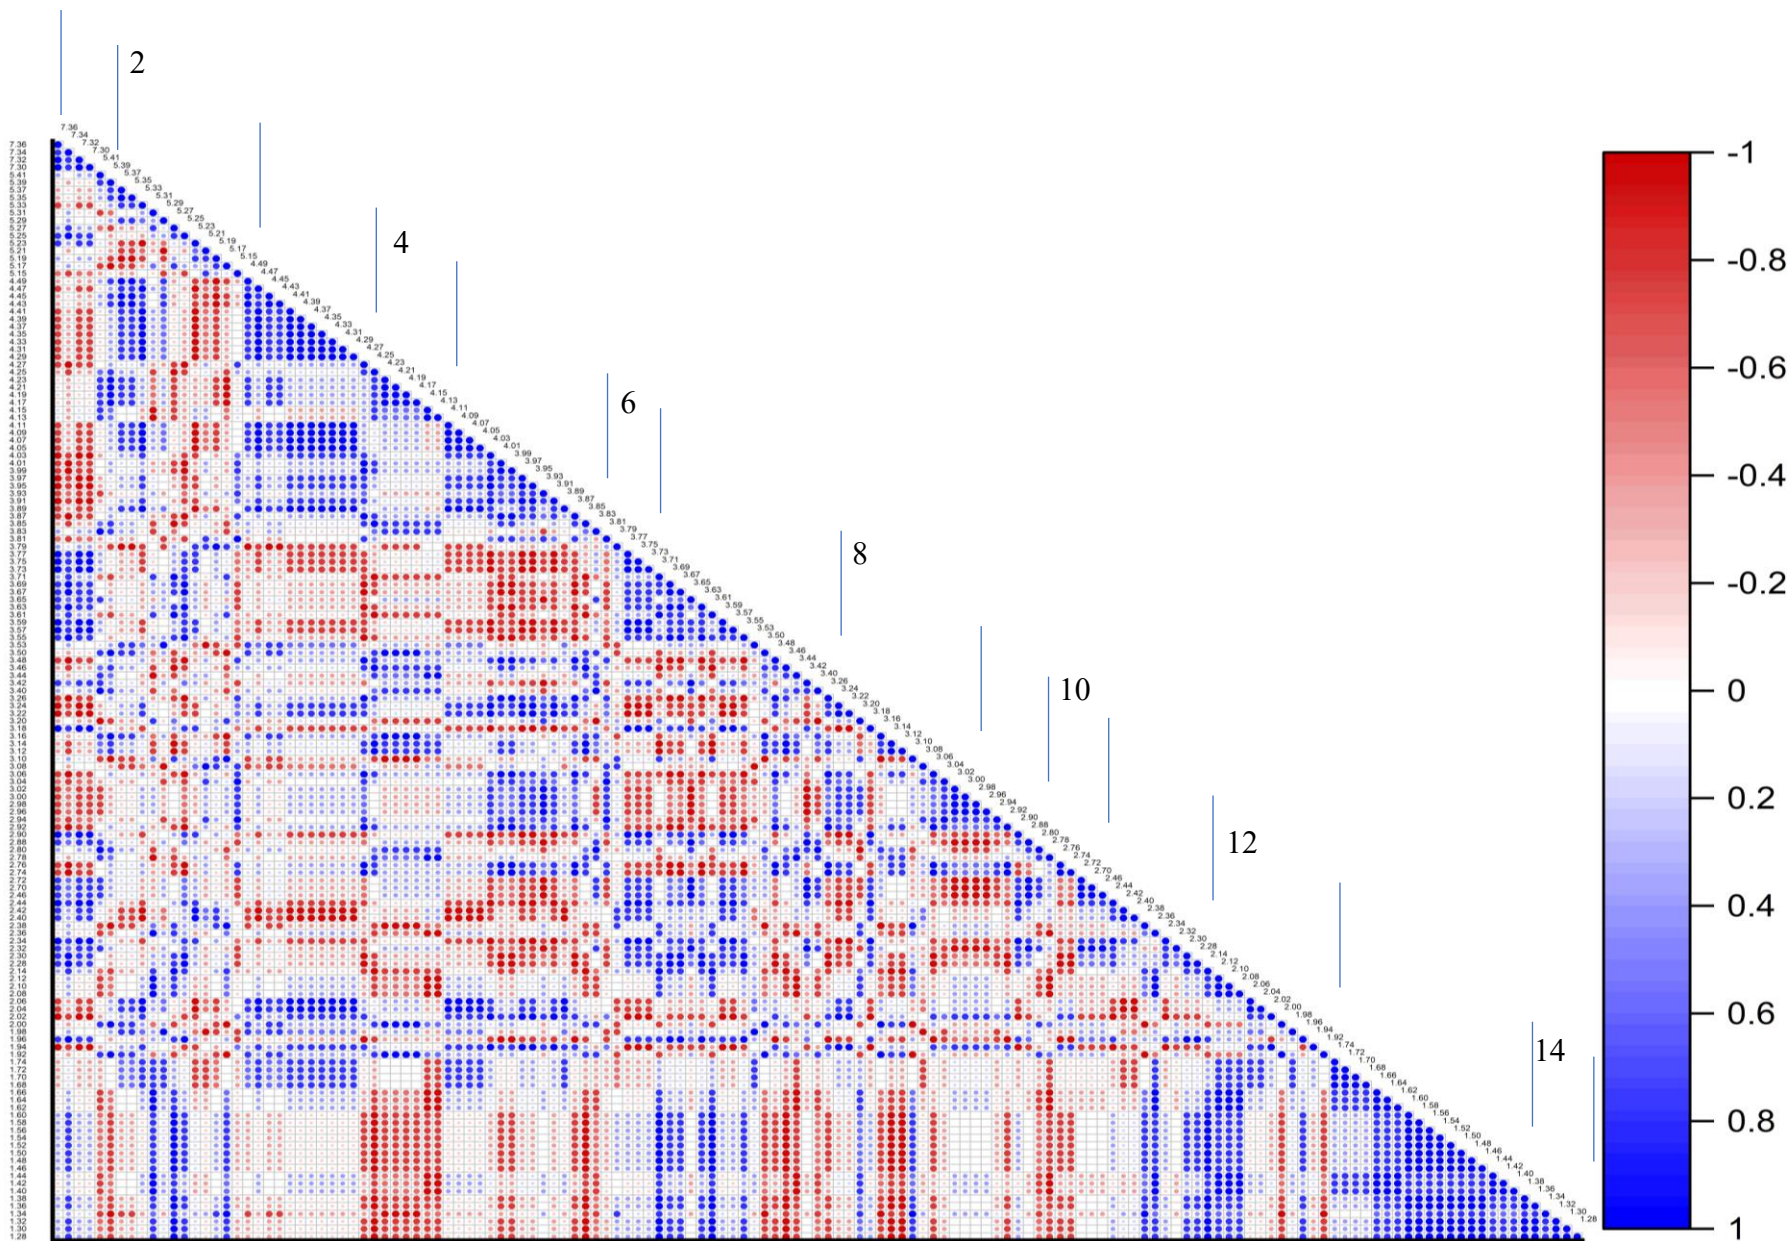

Figure S33. Spearman correlation of group of metabolites present in regions 1-14 of variable salinity (20 -35 psu) in vegetative phase.



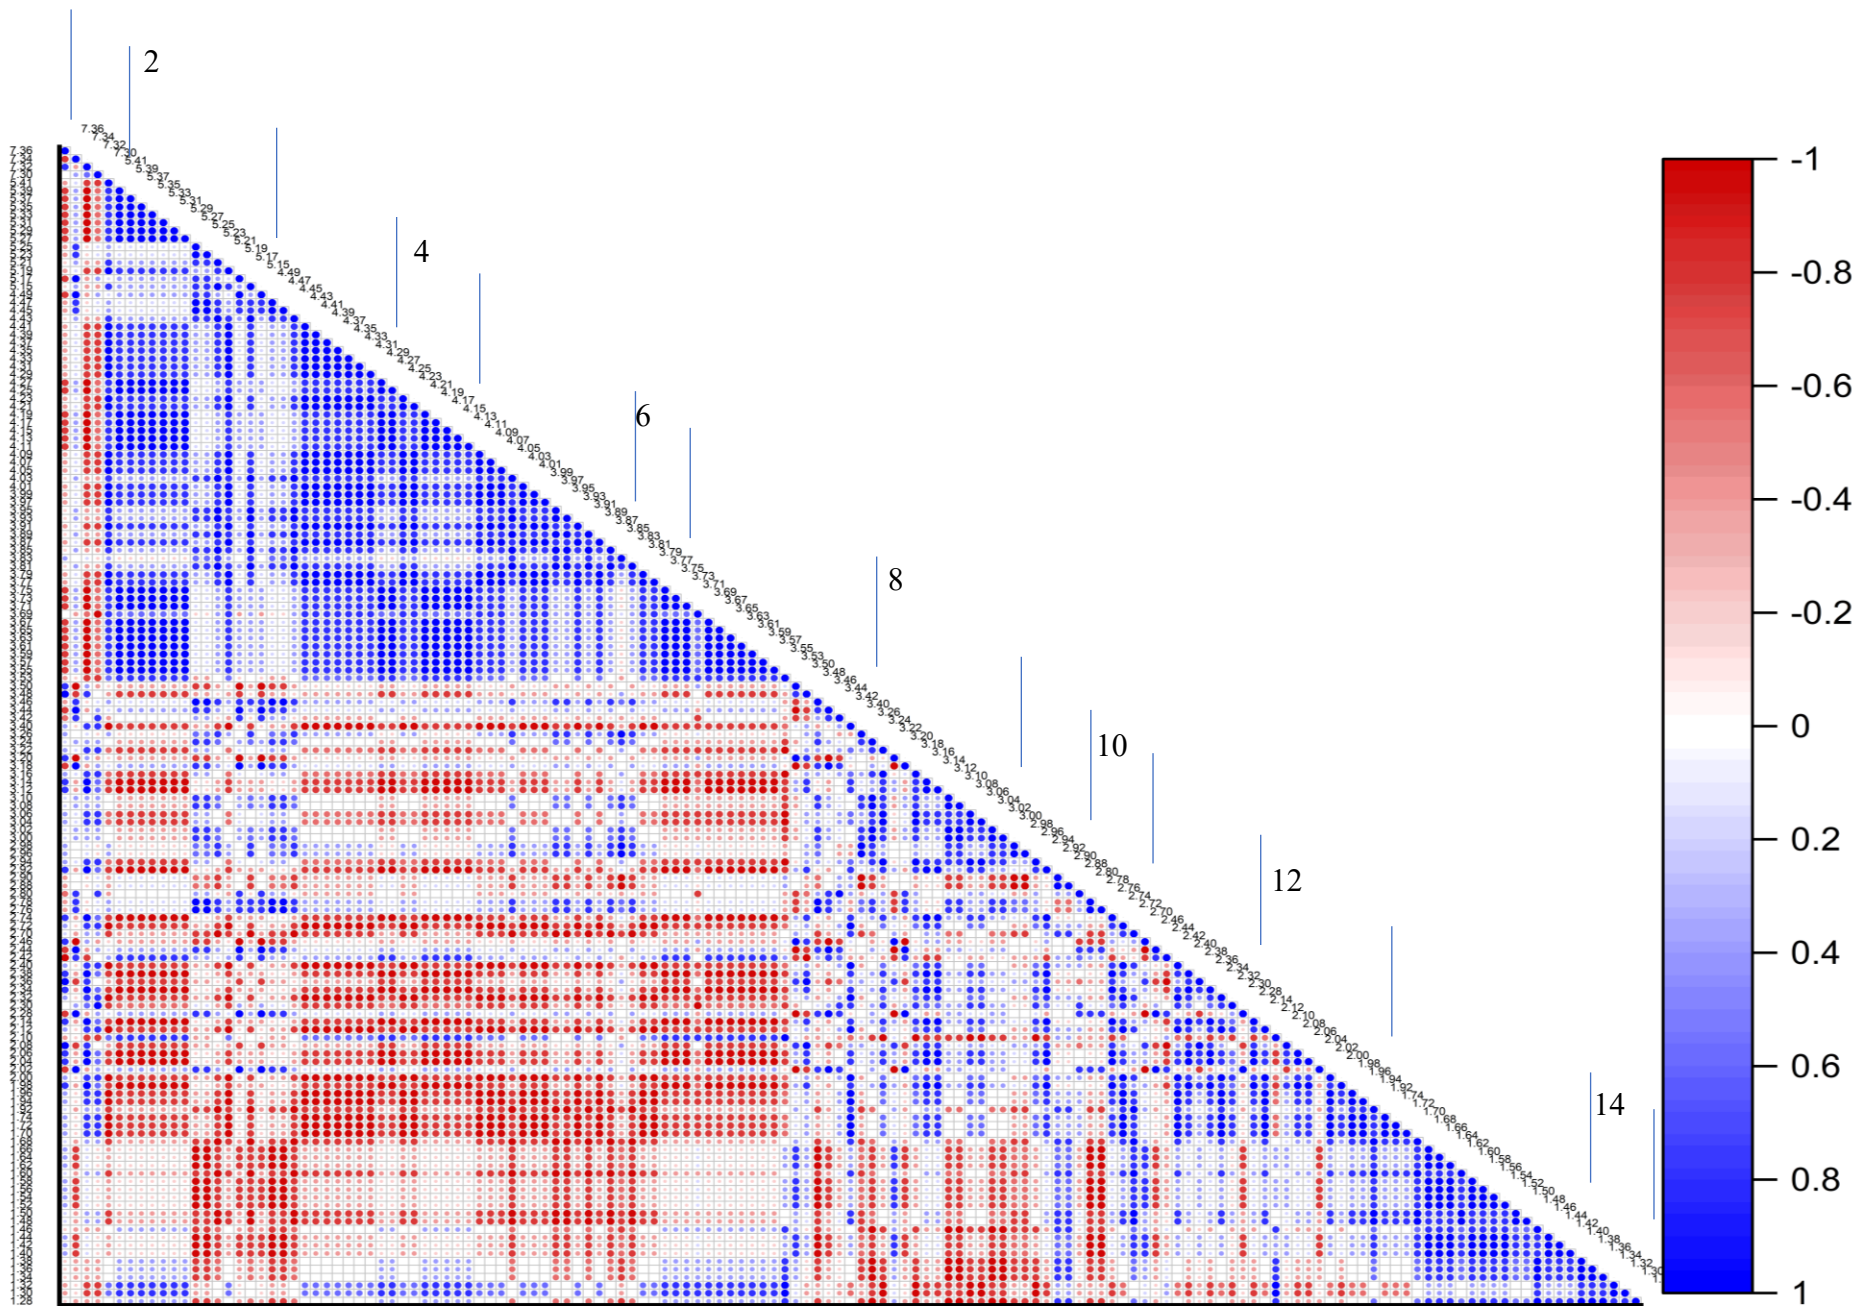

Figure S34. Spearman correlation of group of metabolites present in regions 1-14 of variable salinity (20 -35 psu) in determination phase.



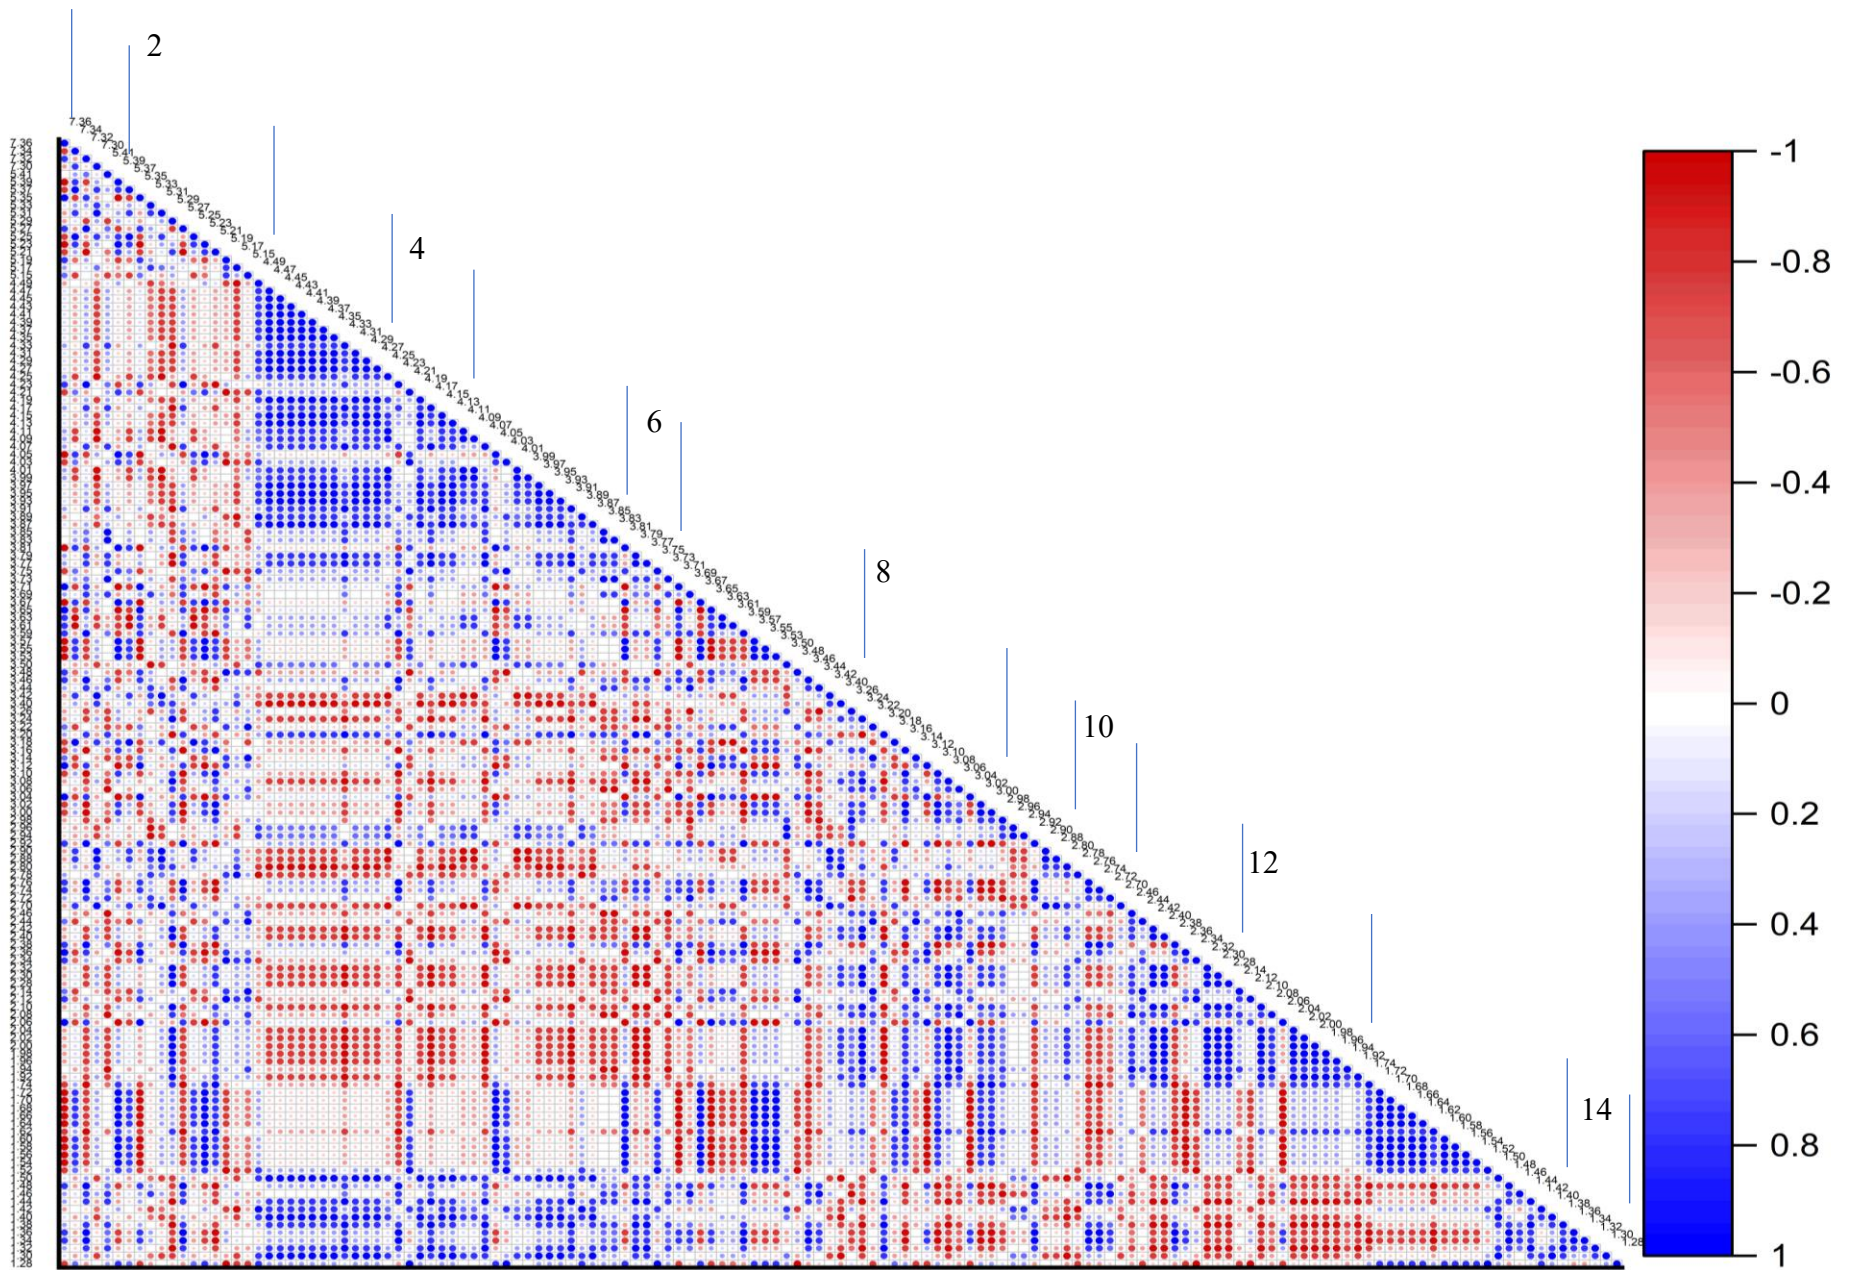

Figure S35. Spearman correlation of group of metabolites present in regions 1-14 of variable salinity (20 -35 psu) in differentiation phase.

**Box S3: Spearman correlation between three phases in variable temperature**

In variable temperature metabolites in regions 3, 8,9,10 showed a positive correlation in all three phases whereas a negative correlation was found between regions (2-4 and 5-8 and 13) in the vegetative phase (Fig. S36, S37, S38). In case of variable temperature in vegetative phase positive correlation found between metabolites in regions 2-5,6-7 and 13-14. Negative correlation observed between regions 3-5 and 6-8 as well 13-14 (Fig. S36). In case of variable temperature in determination phase positive correlation found between metabolites in regions 3 and 8-10 as well 11-14. Negative correlation found between regions 3-5 and 6 (Fig. S37). In case of variable temperature in differentiation phase positive correlation found between metabolites in regions 4-7 and 11-13. Negative correlation found between region 2 and 3-12(Fig. S38).

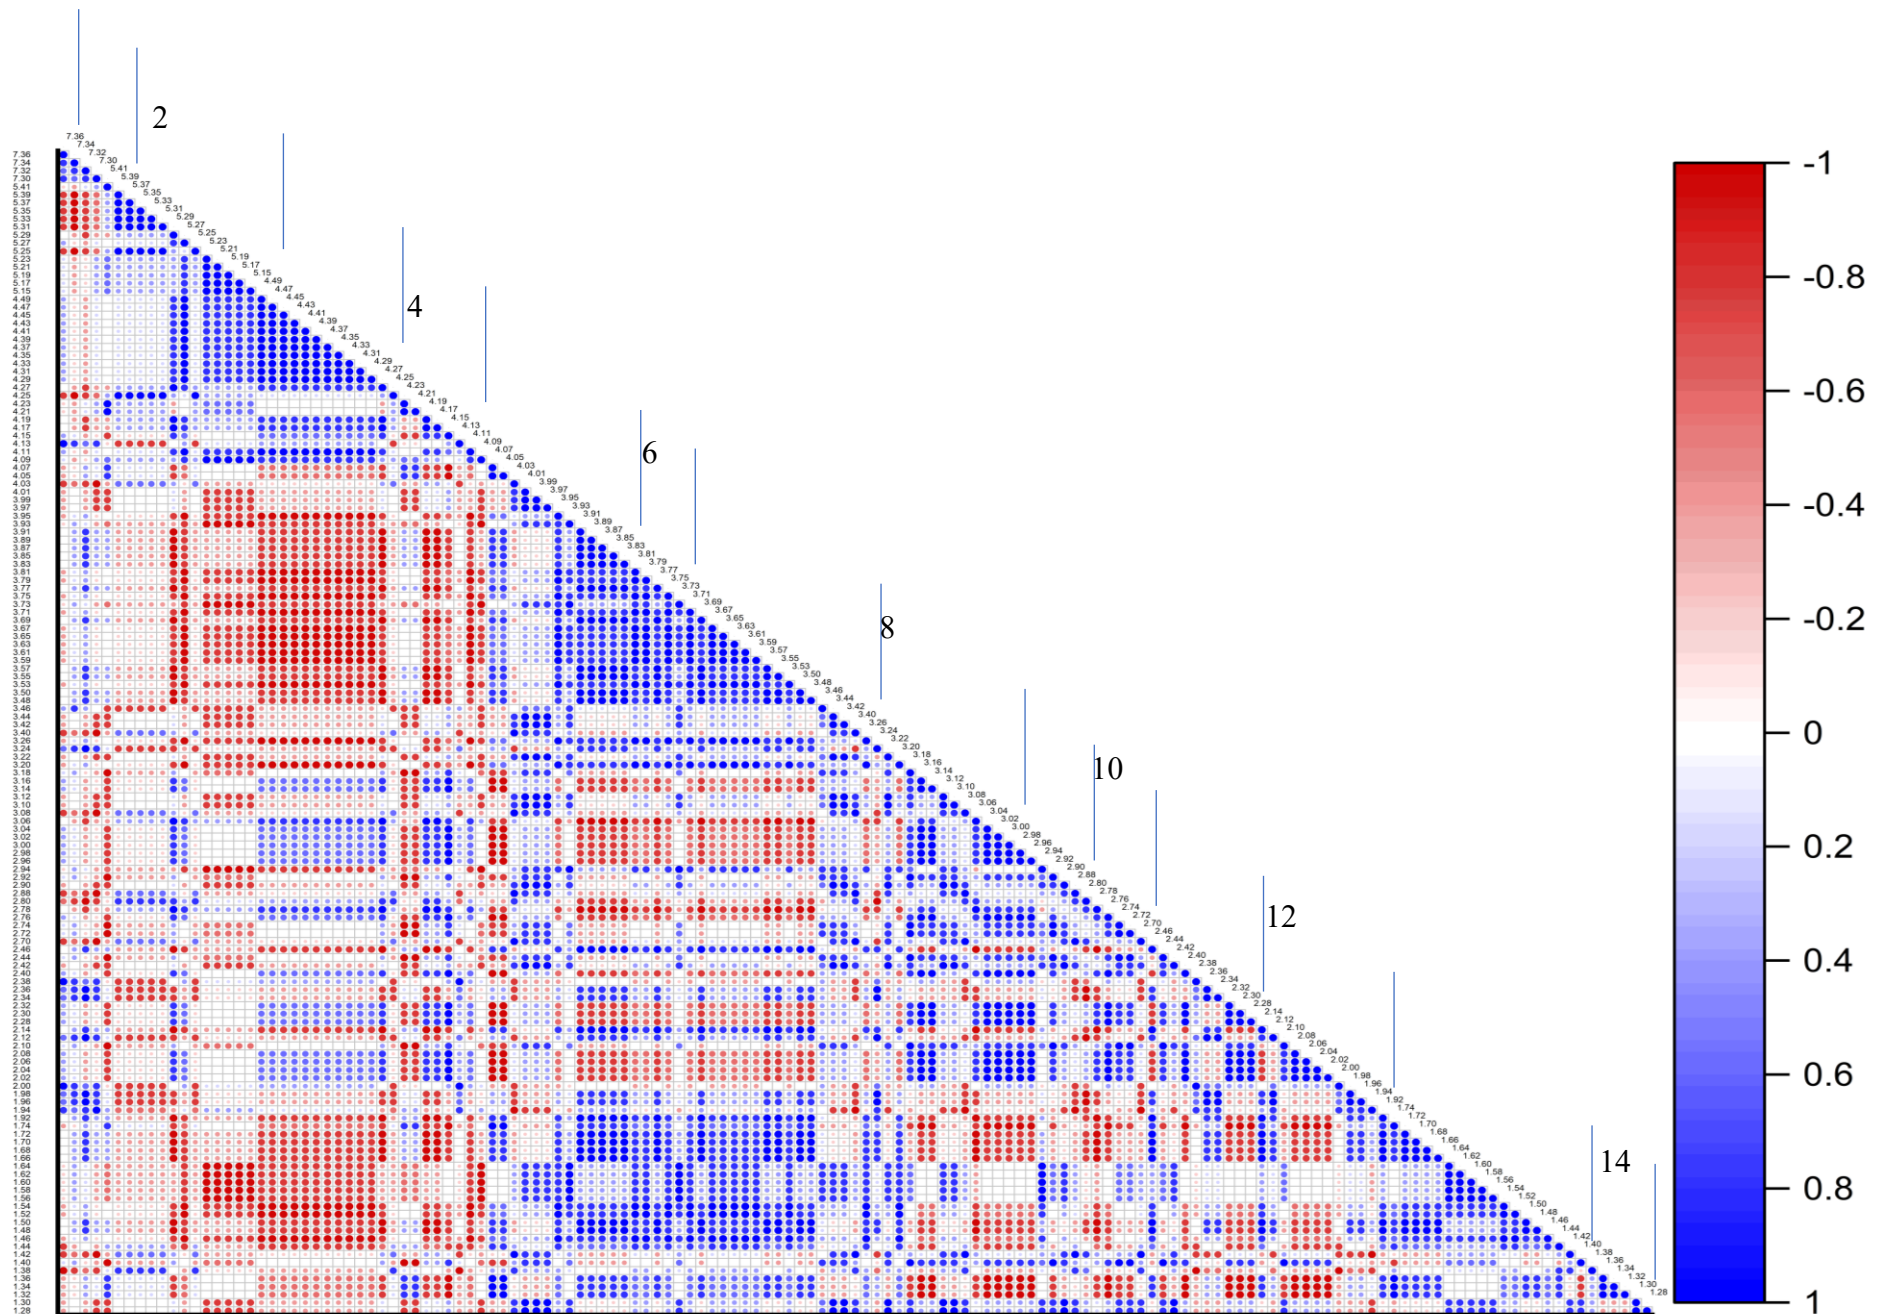

Figure S36. Spearman correlation of group of metabolites present in regions 1-14 of variable temperature (20 -35°C) in vegetative phase.



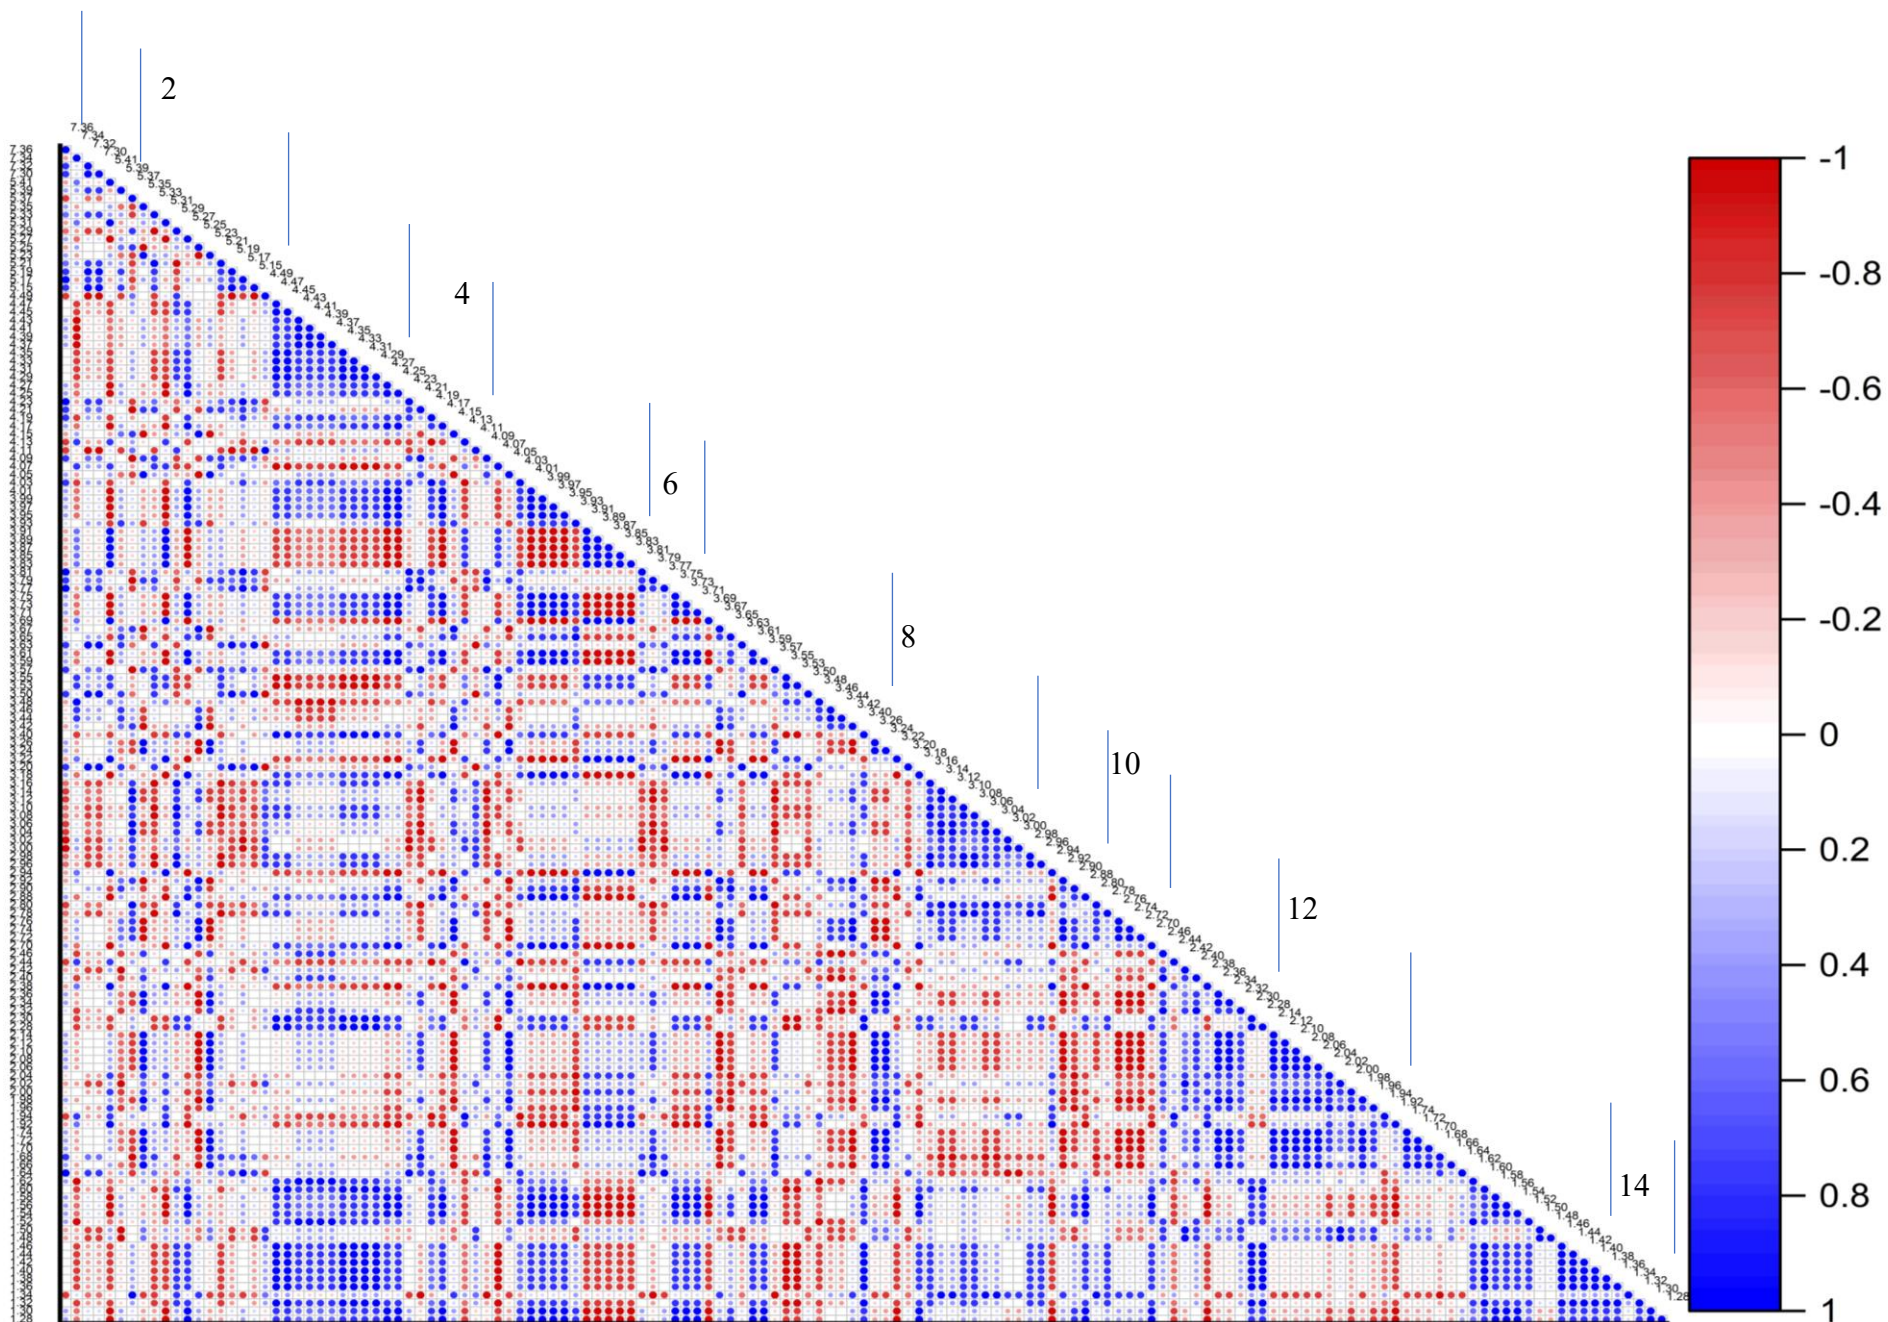

Figure S37. Spearman correlation of group of metabolites present in regions 1-14 of variable temperature (20-35°C) in determination phase.



**Box S4: Spearman correlation between three phases in variable light intensity**

In variable light intensity metabolites in regions 2-7, 8-12 showed a positive correlation in all three phases whereas a negative correlation was found between regions (8-12 and 4-8) in the vegetative and differentiation phase (Fig. S39, S40, S41). In case of variable light intensity in vegetative phase positive correlation found between metabolites in regions 3 and 8-10 but no correlation of region 3 with 13-14. Positive correlation found between regions 4-7, 9-12 and 13-14 but negative correlation found between regions 4-7 and 8-13, 8-13 and 13-14 (Fig. S39). In case of determination phase positive correlation found between metabolites in regions 3-13 (Fig. S40). In case of differentiation phase positive correlation found between metabolites in regions 3, 4-6, 8-13. Negative correlation observed between regions 4-7 and 8-13 (Fig. S41).



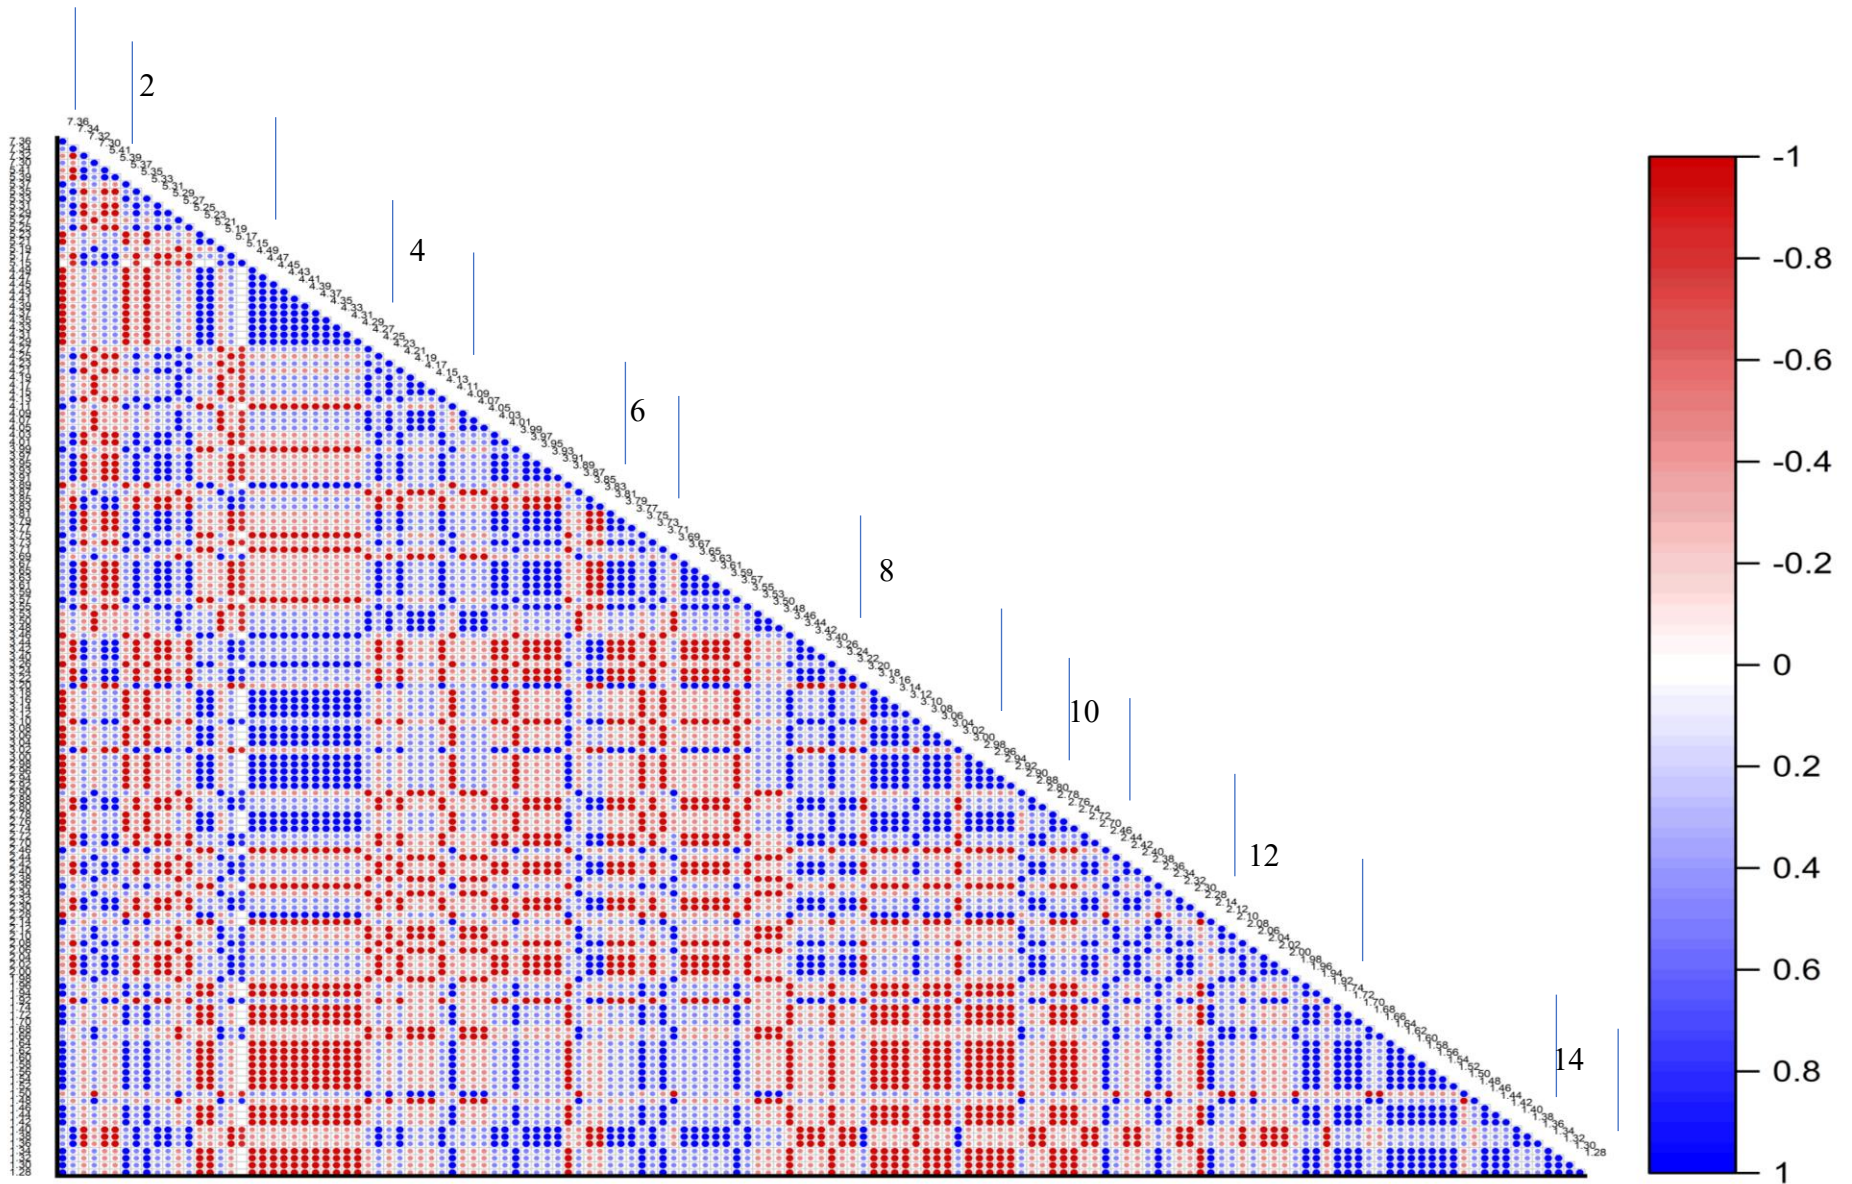

Figure S39. Spearman correlation of group of metabolites present in regions 1-14 of variable light intensity ( $220\text{-}500 \mu\text{mol photons} \cdot \text{m}^{-2} \cdot \text{s}^{-1}$ ) in vegetative phase.

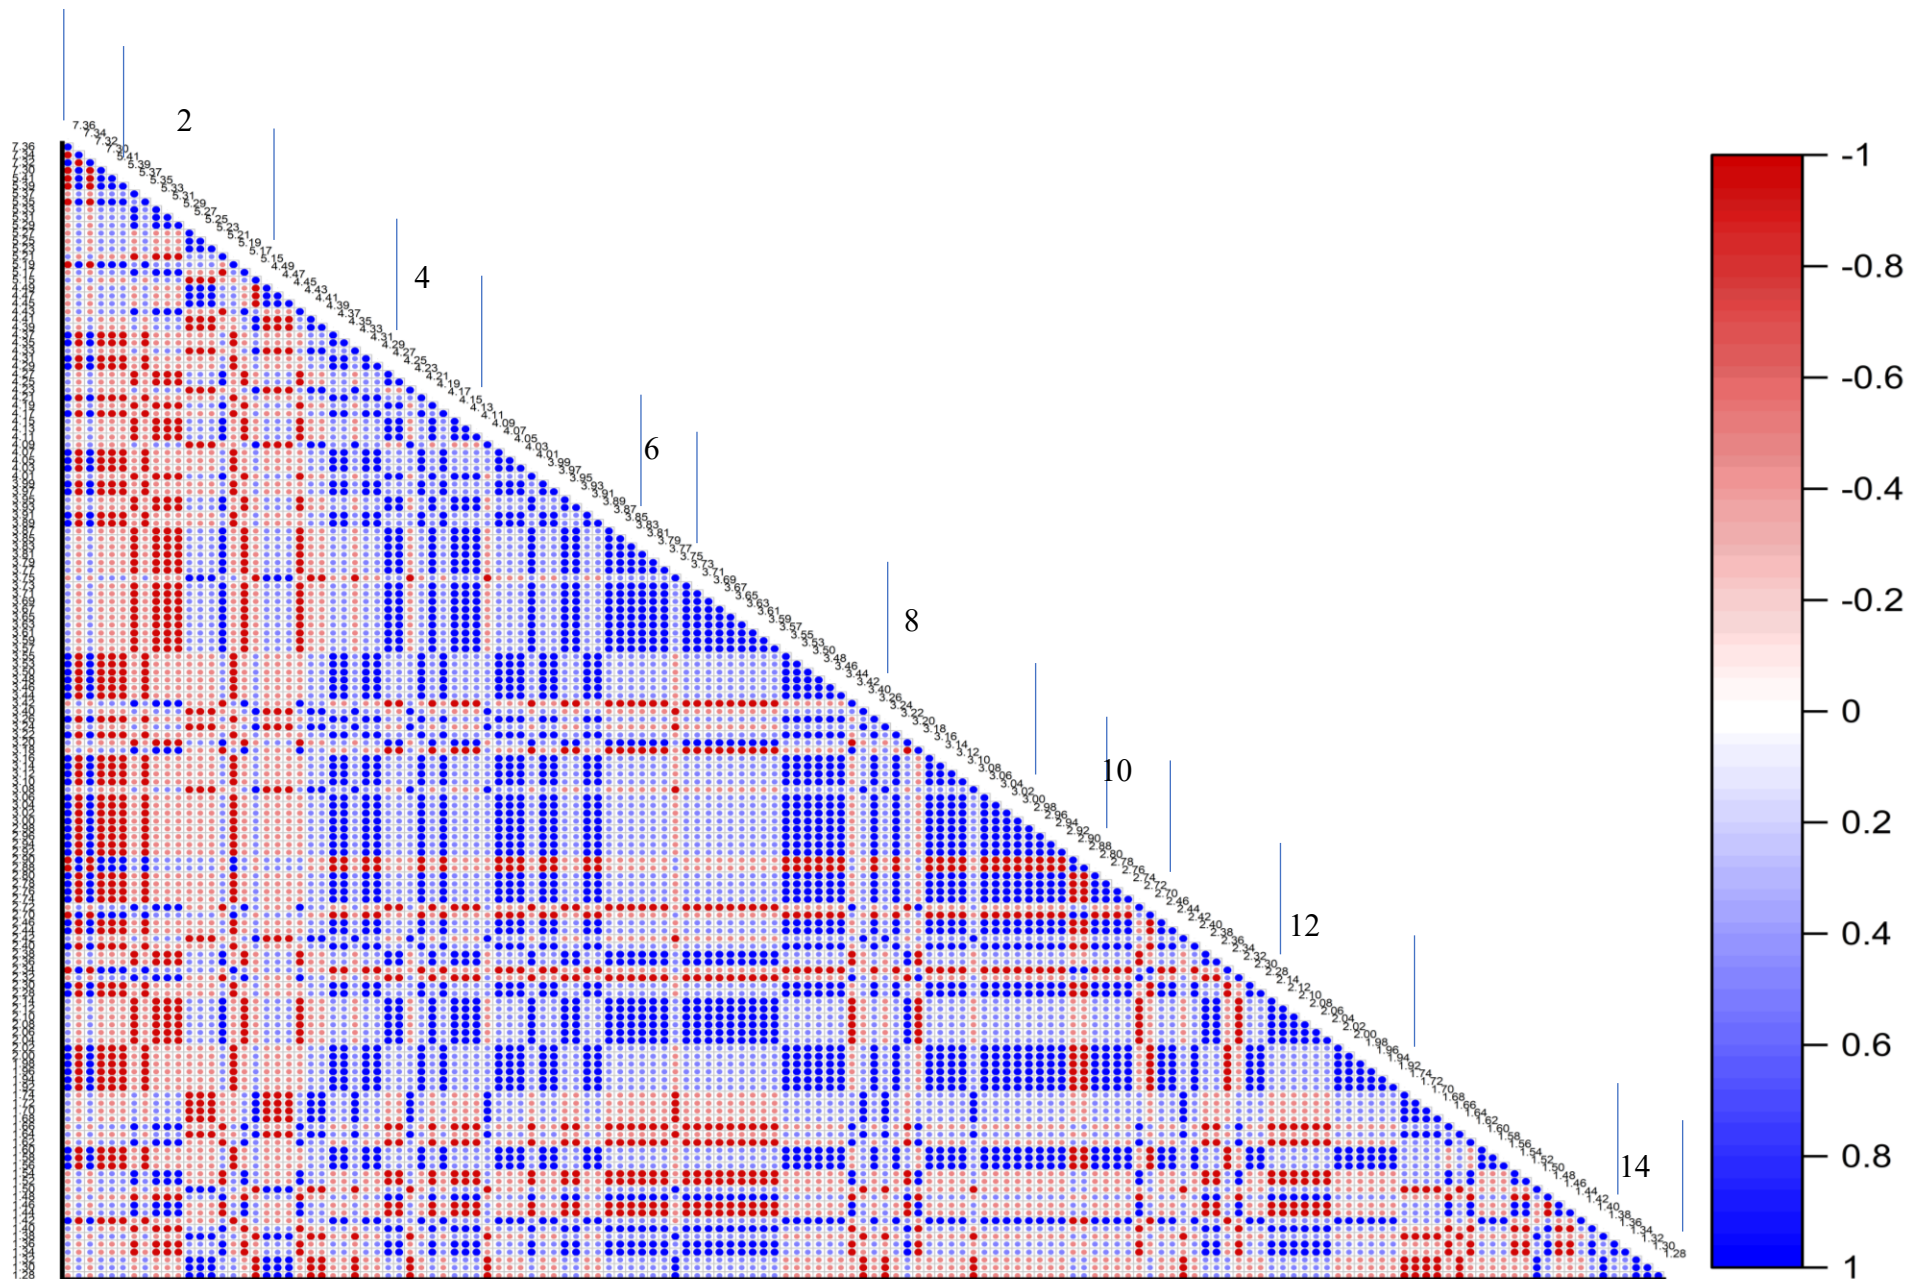

Figure S40. Spearman correlation of group of metabolites present in regions 1-14 of variable light intensity ( $220\text{-}500 \mu\text{mol photons} \cdot \text{m}^{-2} \cdot \text{s}^{-1}$ ) in determination phase.



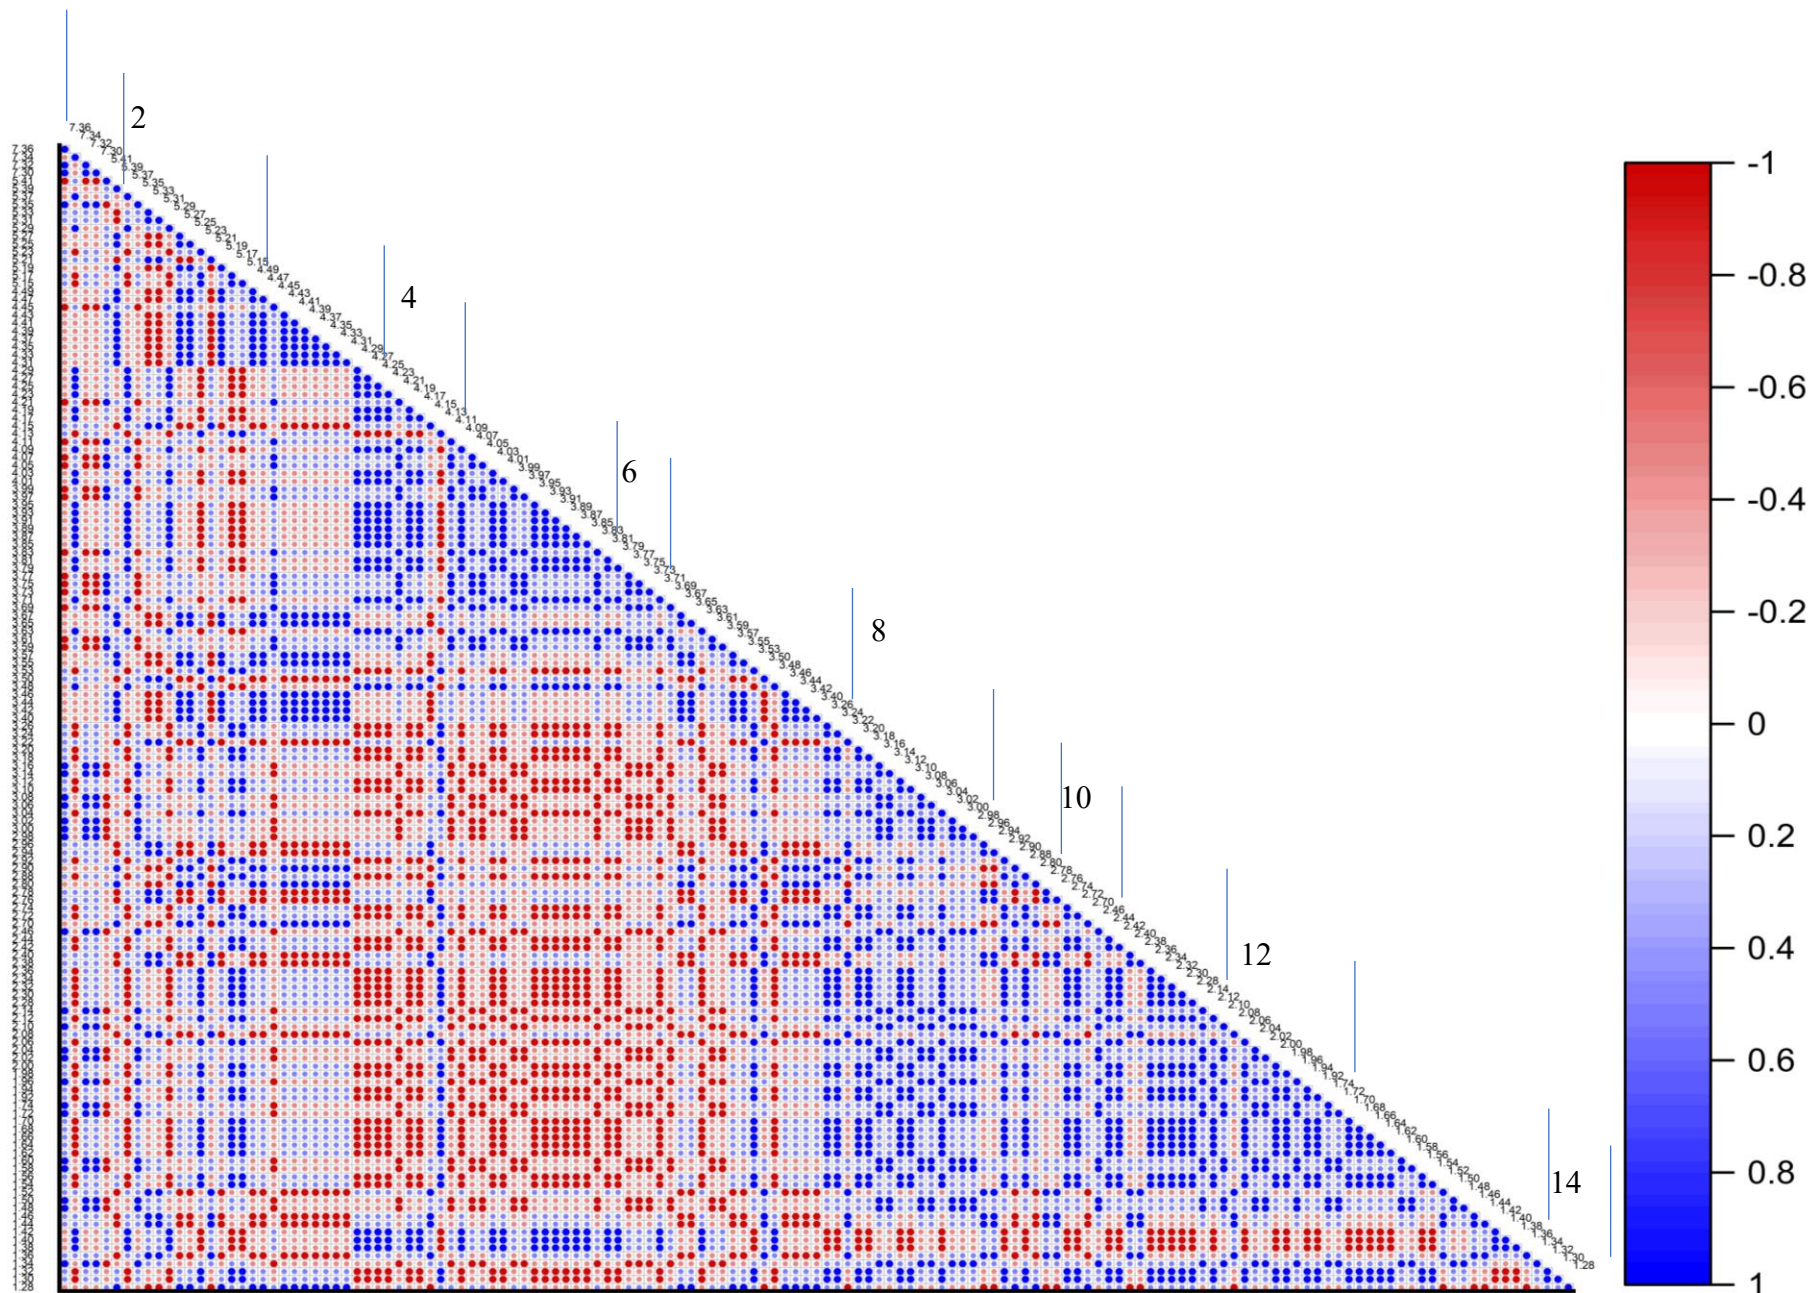

Figure S41. Spearman correlation of group of metabolites present in regions 1-14 of variable light intensity ( $220\text{-}500 \mu\text{mol photons} \cdot \text{m}^{-2} \cdot \text{s}^{-1}$ ) in differentiation phase.

**Box S5: Spearman correlation between three phases in variable photoperiod**

In variable photoperiod metabolites in regions 4-5 showed a positive correlation in all three phases whereas a negative correlation was found between regions (5-6 and 13) in the vegetative and determination phase (Fig. S42, S43, S44). In case of variable photoperiod in vegetative phase positive correlation found between metabolites in regions 2-5, 6-7, 8-13 whereas negative correlation found between 6-7 and 7-14 as well in regions 3 and 6-7 (Fig. S42). In case of determination phase positive correlation found between metabolites in regions 3-6 and 12-14. Negative correlation found between regions 4-6 and 12-14 (Fig. S43). In case of differentiation phase positive correlation found between metabolites in regions 3-6 but regions 3-4 negatively related with 5-6, and 11-12 (Fig. S44).



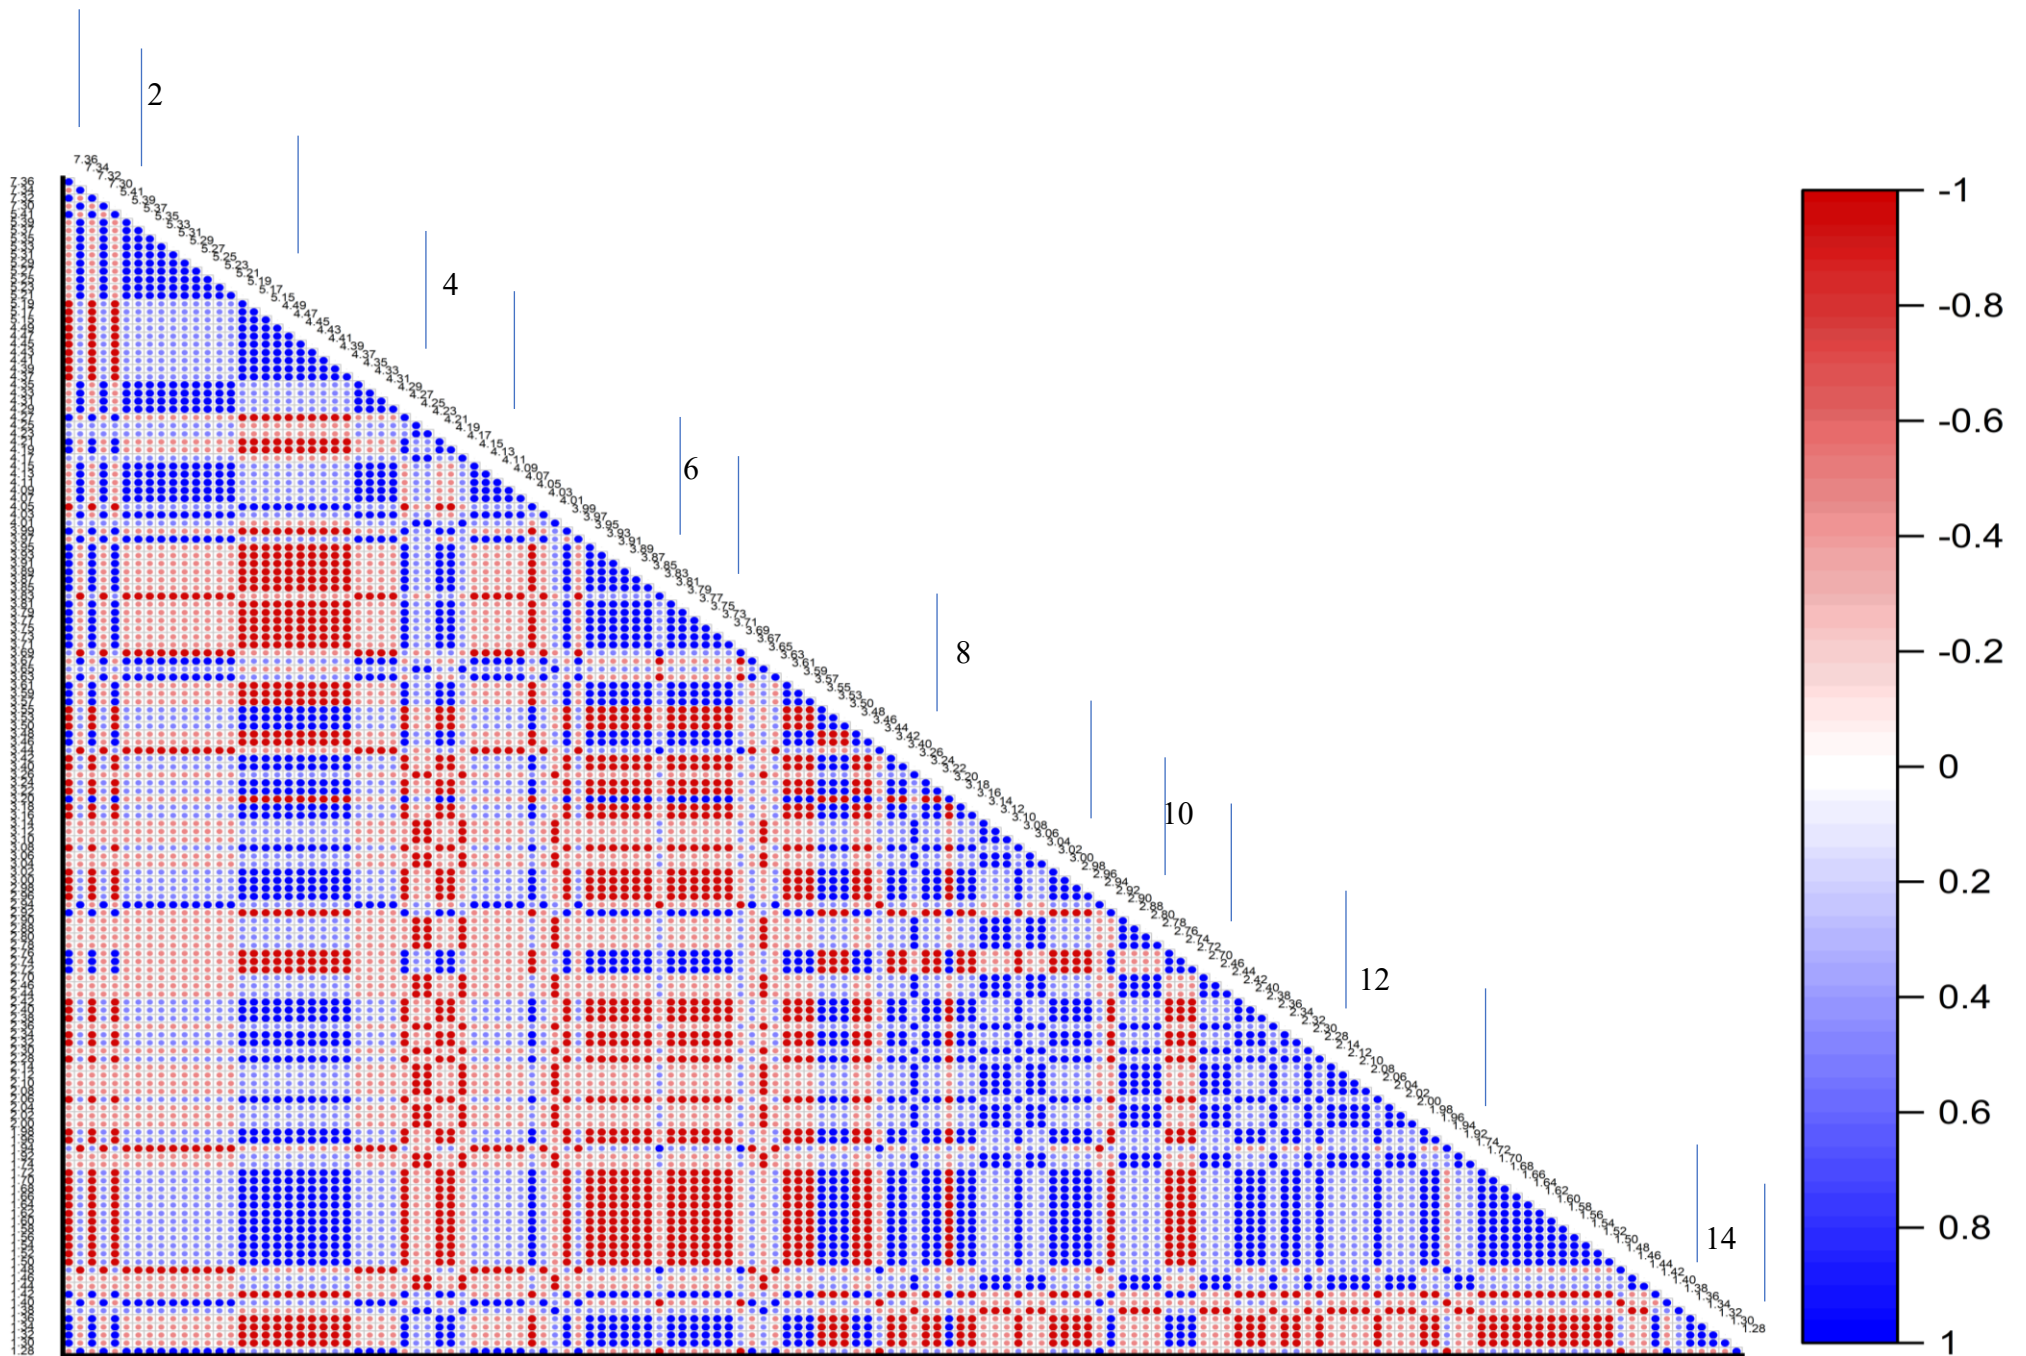

Figure S42. Spearman correlation of group of metabolites present in regions 1-14 of variable photoperiod (16:8, 8:16,12:12 D/N) in vegetative phase.



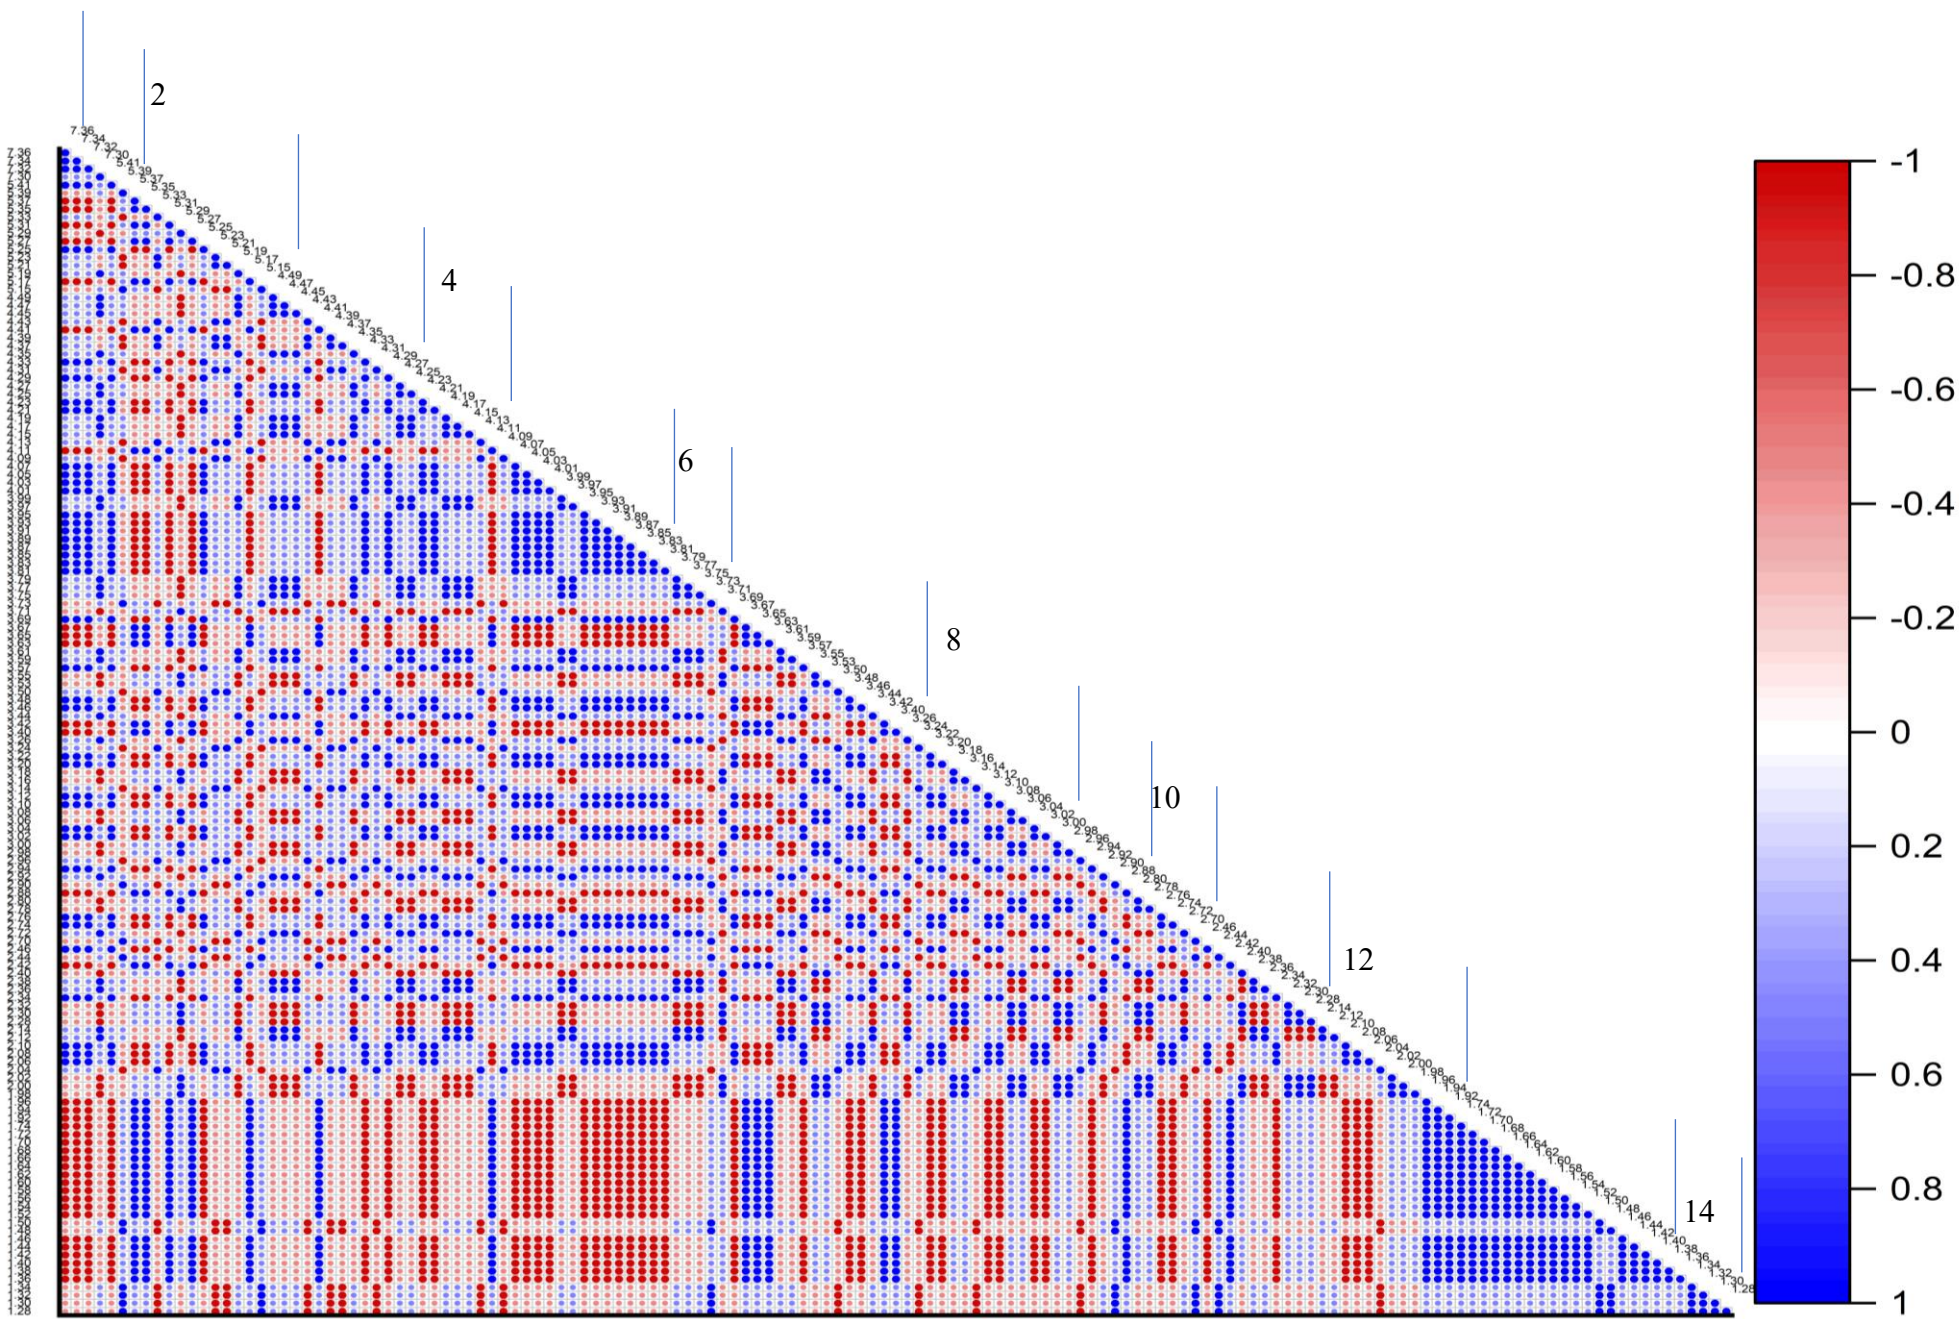

Figure S43. Spearman correlation of group of metabolites present in regions 1-14 of variable photoperiod (16:8, 8:16, 12:12 D/N) in determination phase.



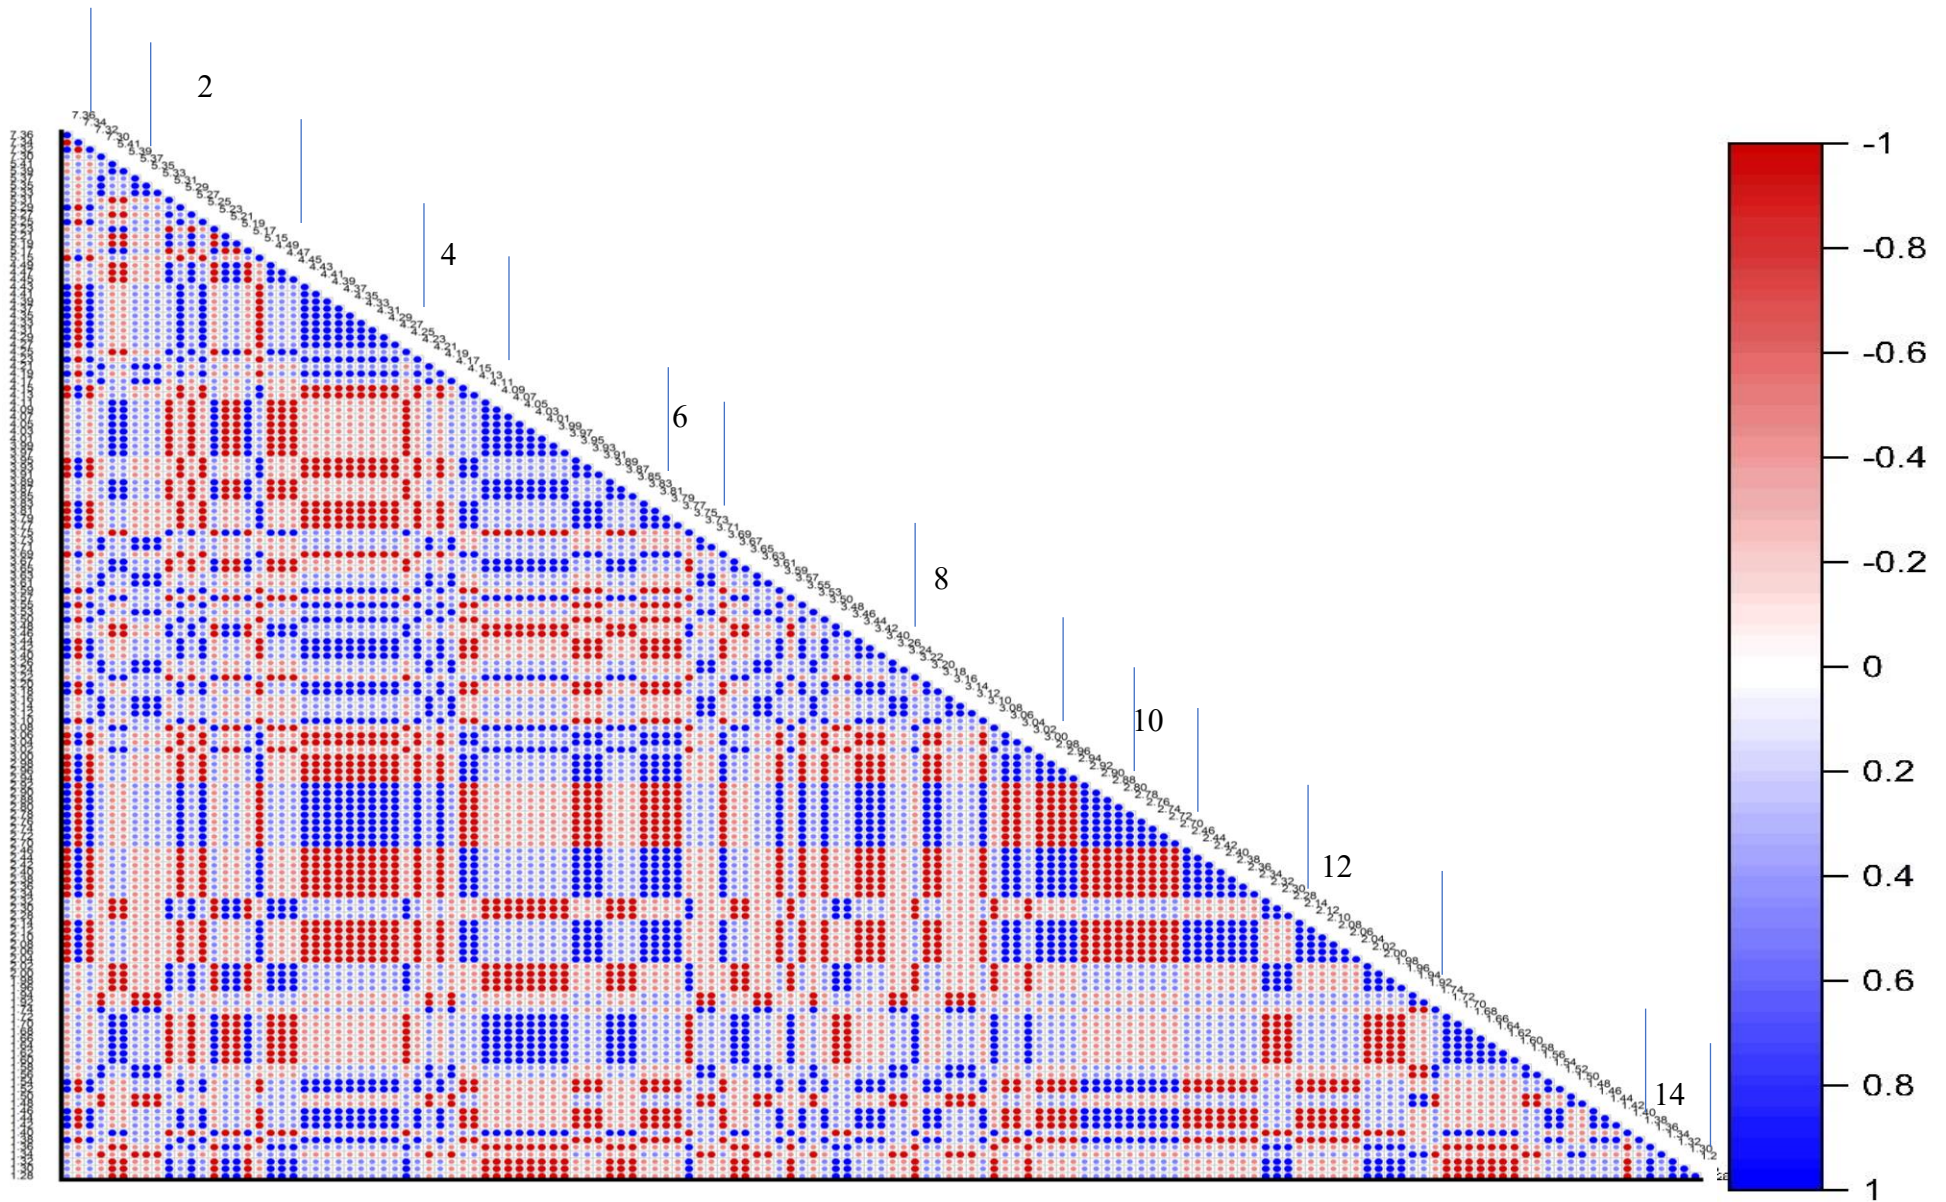

Figure S44. Spearman correlation of group of metabolites present in regions 1-14 of variable photoperiod (16:8, 8:16,12:12 D/N) in differentiation phase.

**Box S6: Spearman correlation between three phases in variable nitrate**

In variable nitrate metabolites in regions 11-14 showed a positive correlation in all three phases as well regions 4-8 showed a positive correlation in the vegetative and determination phases Negative correlation was found between regions (4-8 and 12) in all three phases (Fig. S45, S46, S47). In case of variable nitrate in vegetative phase positive correlation found between metabolites in regions 4-10, 11-14 but negative correlation found in regions 4-8 and 9-14 (Fig. S45). In case of determination phase positive correlation found between metabolites in regions 4-7, 8-13 but negative correlation found between regions 4-7 and 8-13 (Fig. S46). In case of variable nitrate in differentiation phase positive correlation found between metabolites in regions 4-7,10-11, 12-14 but no relation found

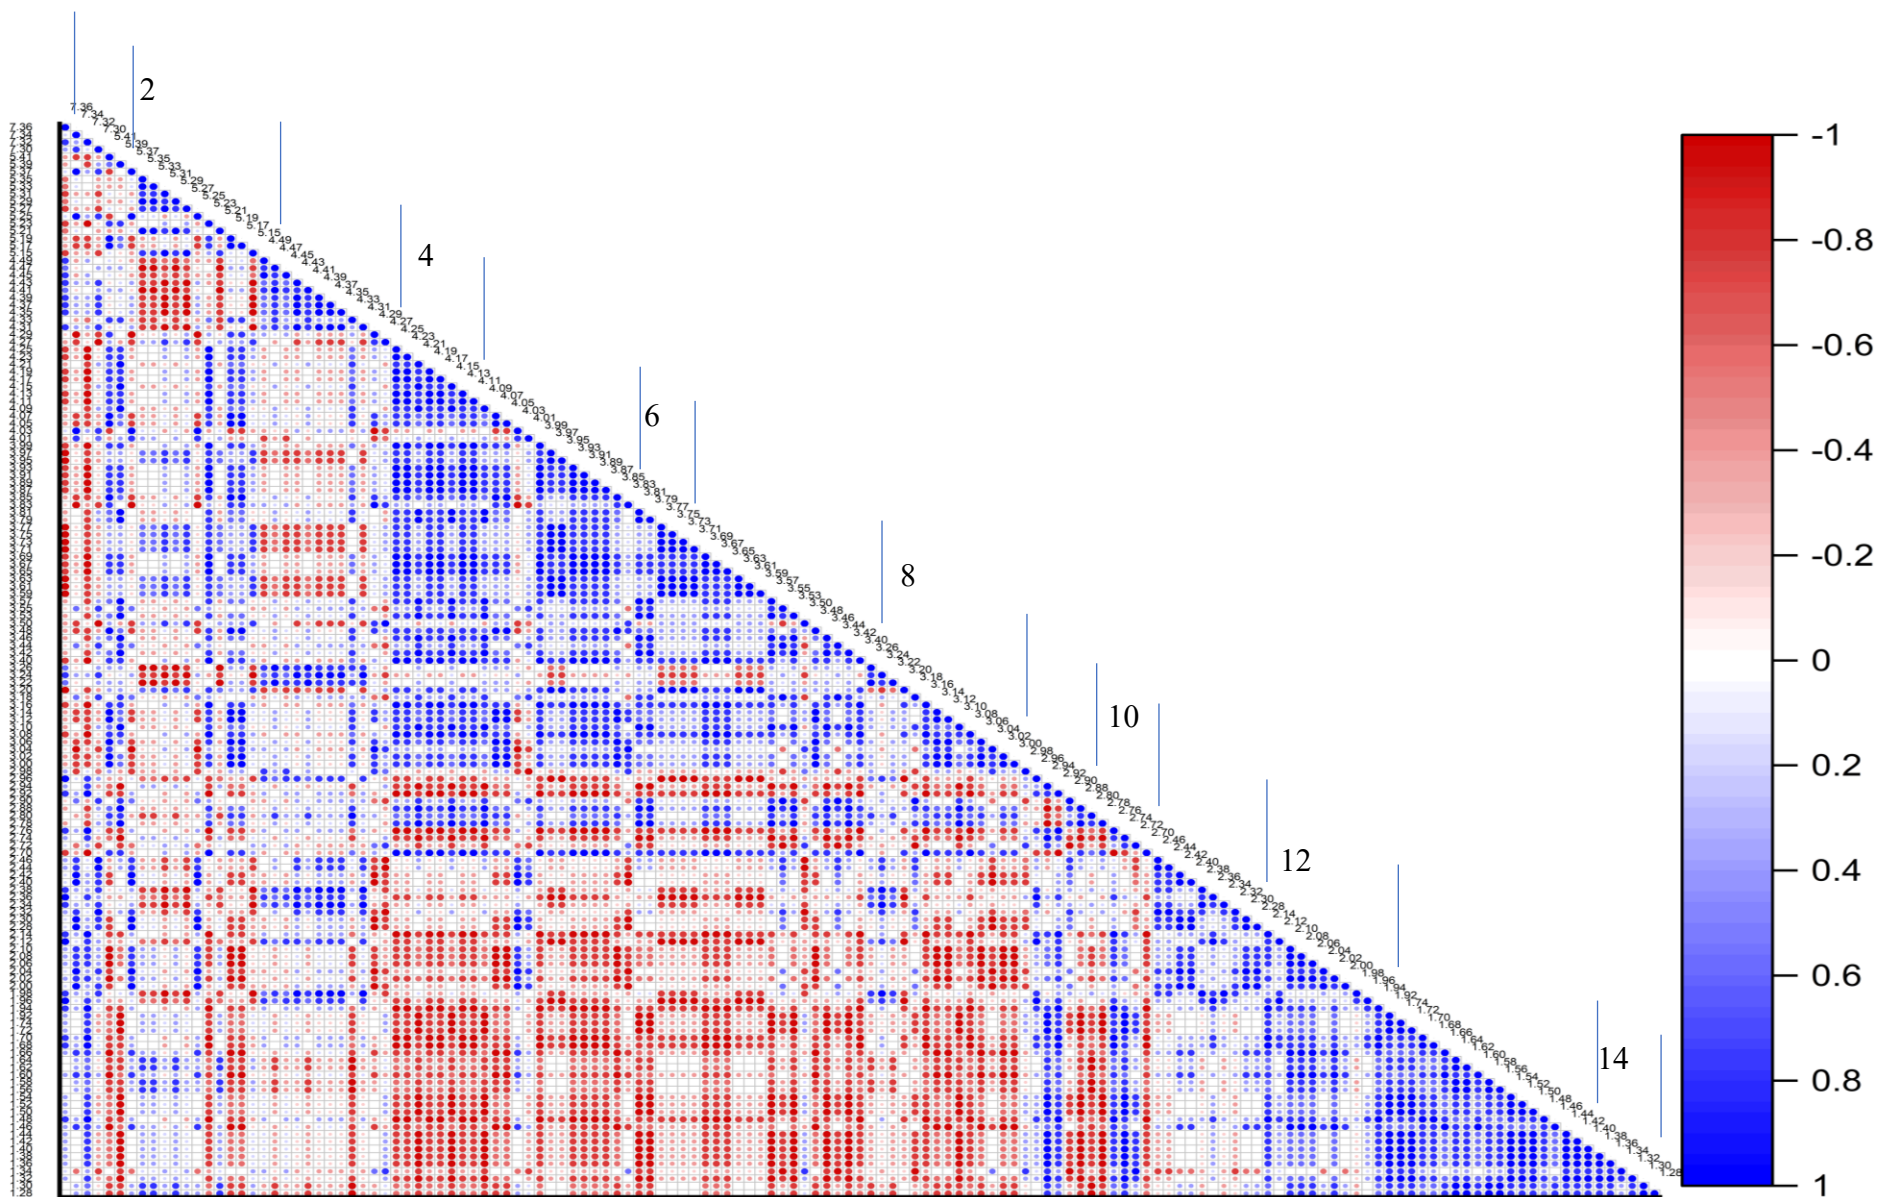

Figure S45. Spearman correlation of group of metabolites present in regions 1-14 of variable nitrate (0.05 - 0.2 g L<sup>-1</sup>) in vegetative phase.



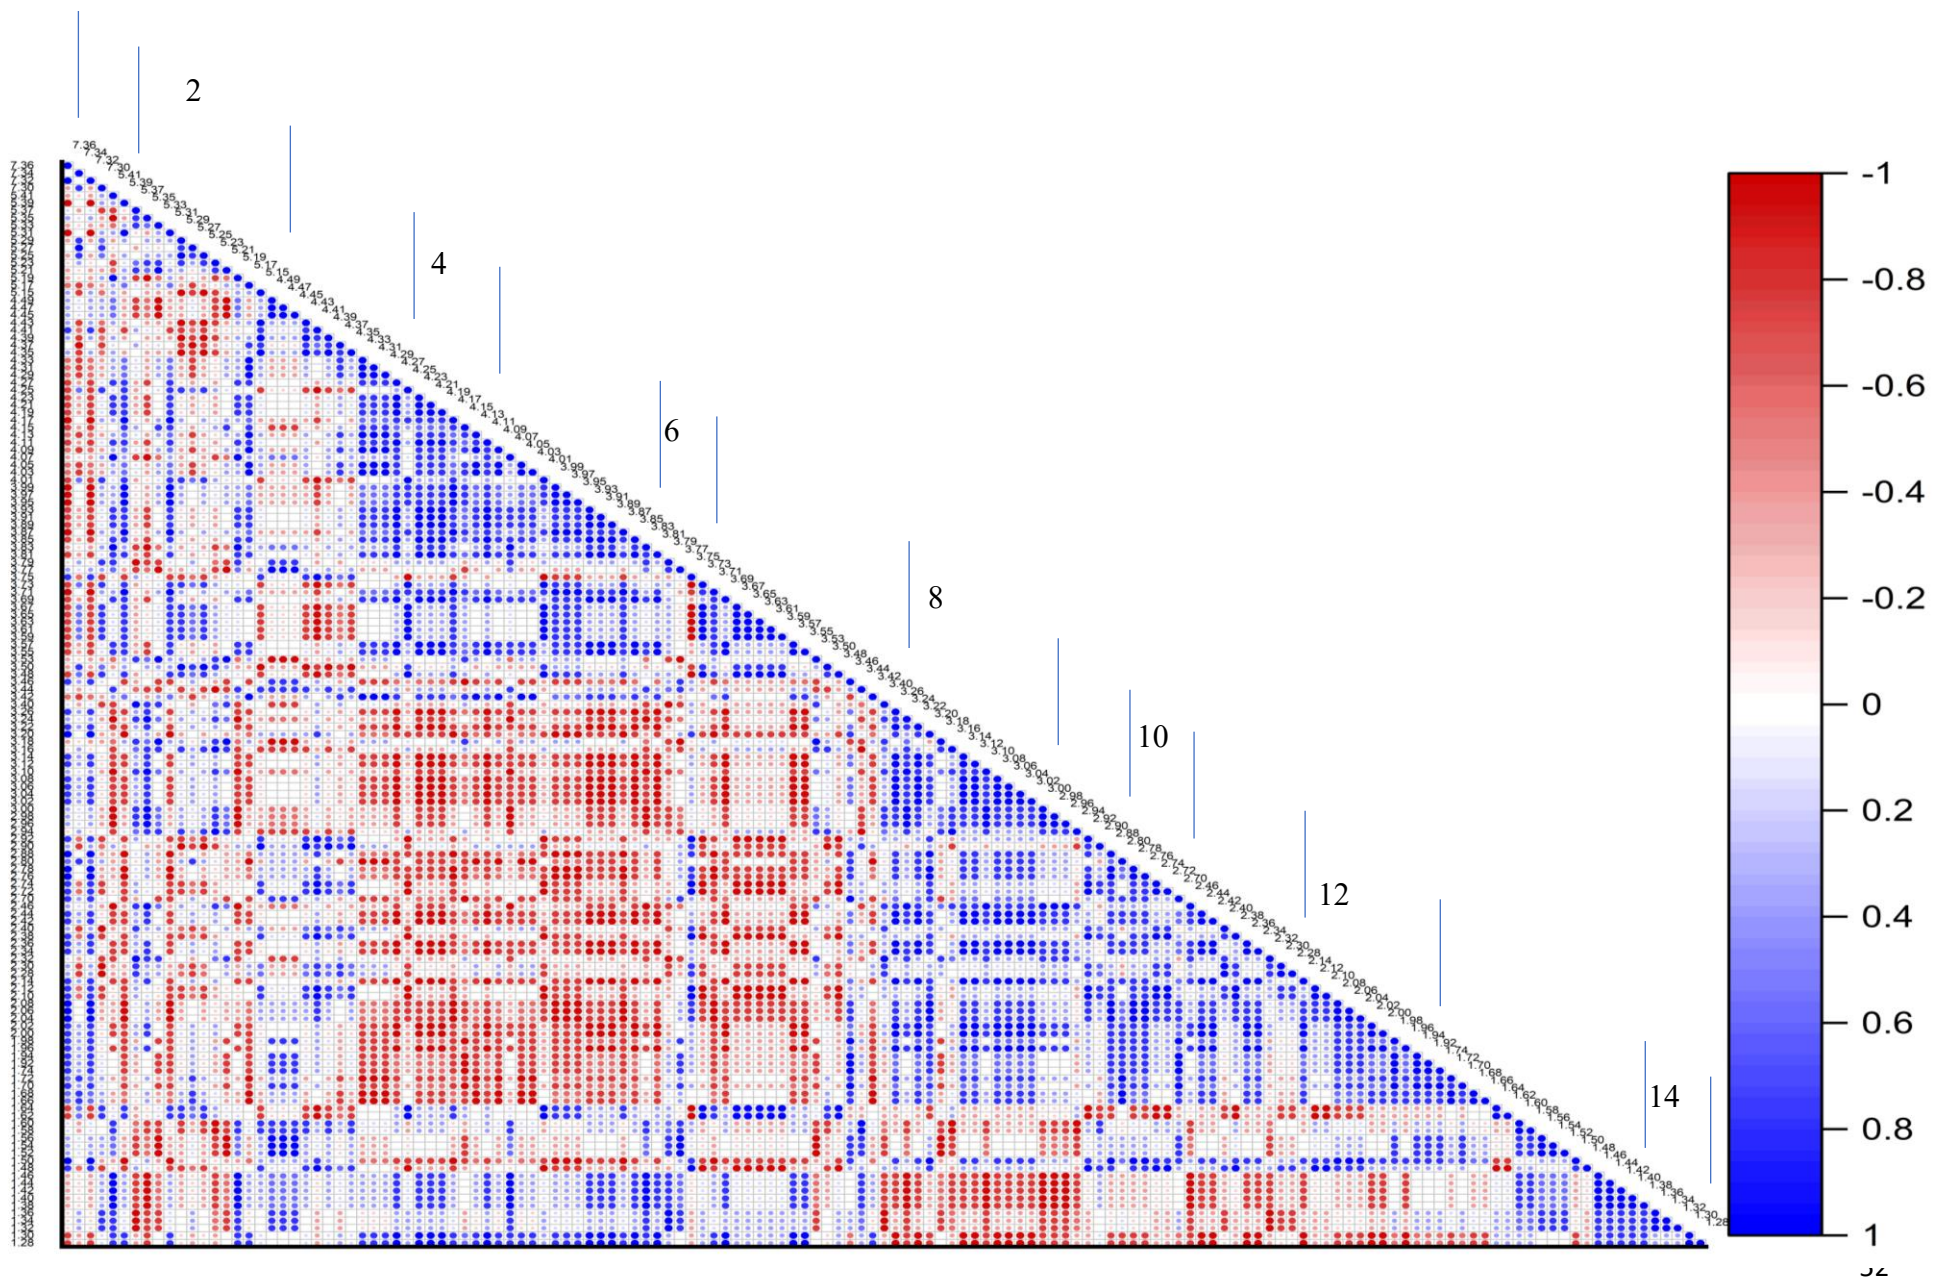

Figure S46. Spearman correlation of group of metabolites present in regions 1-14 of variable nitrate ( $0.05 - 0.2 \text{ g L}^{-1}$ ) in determination phase.



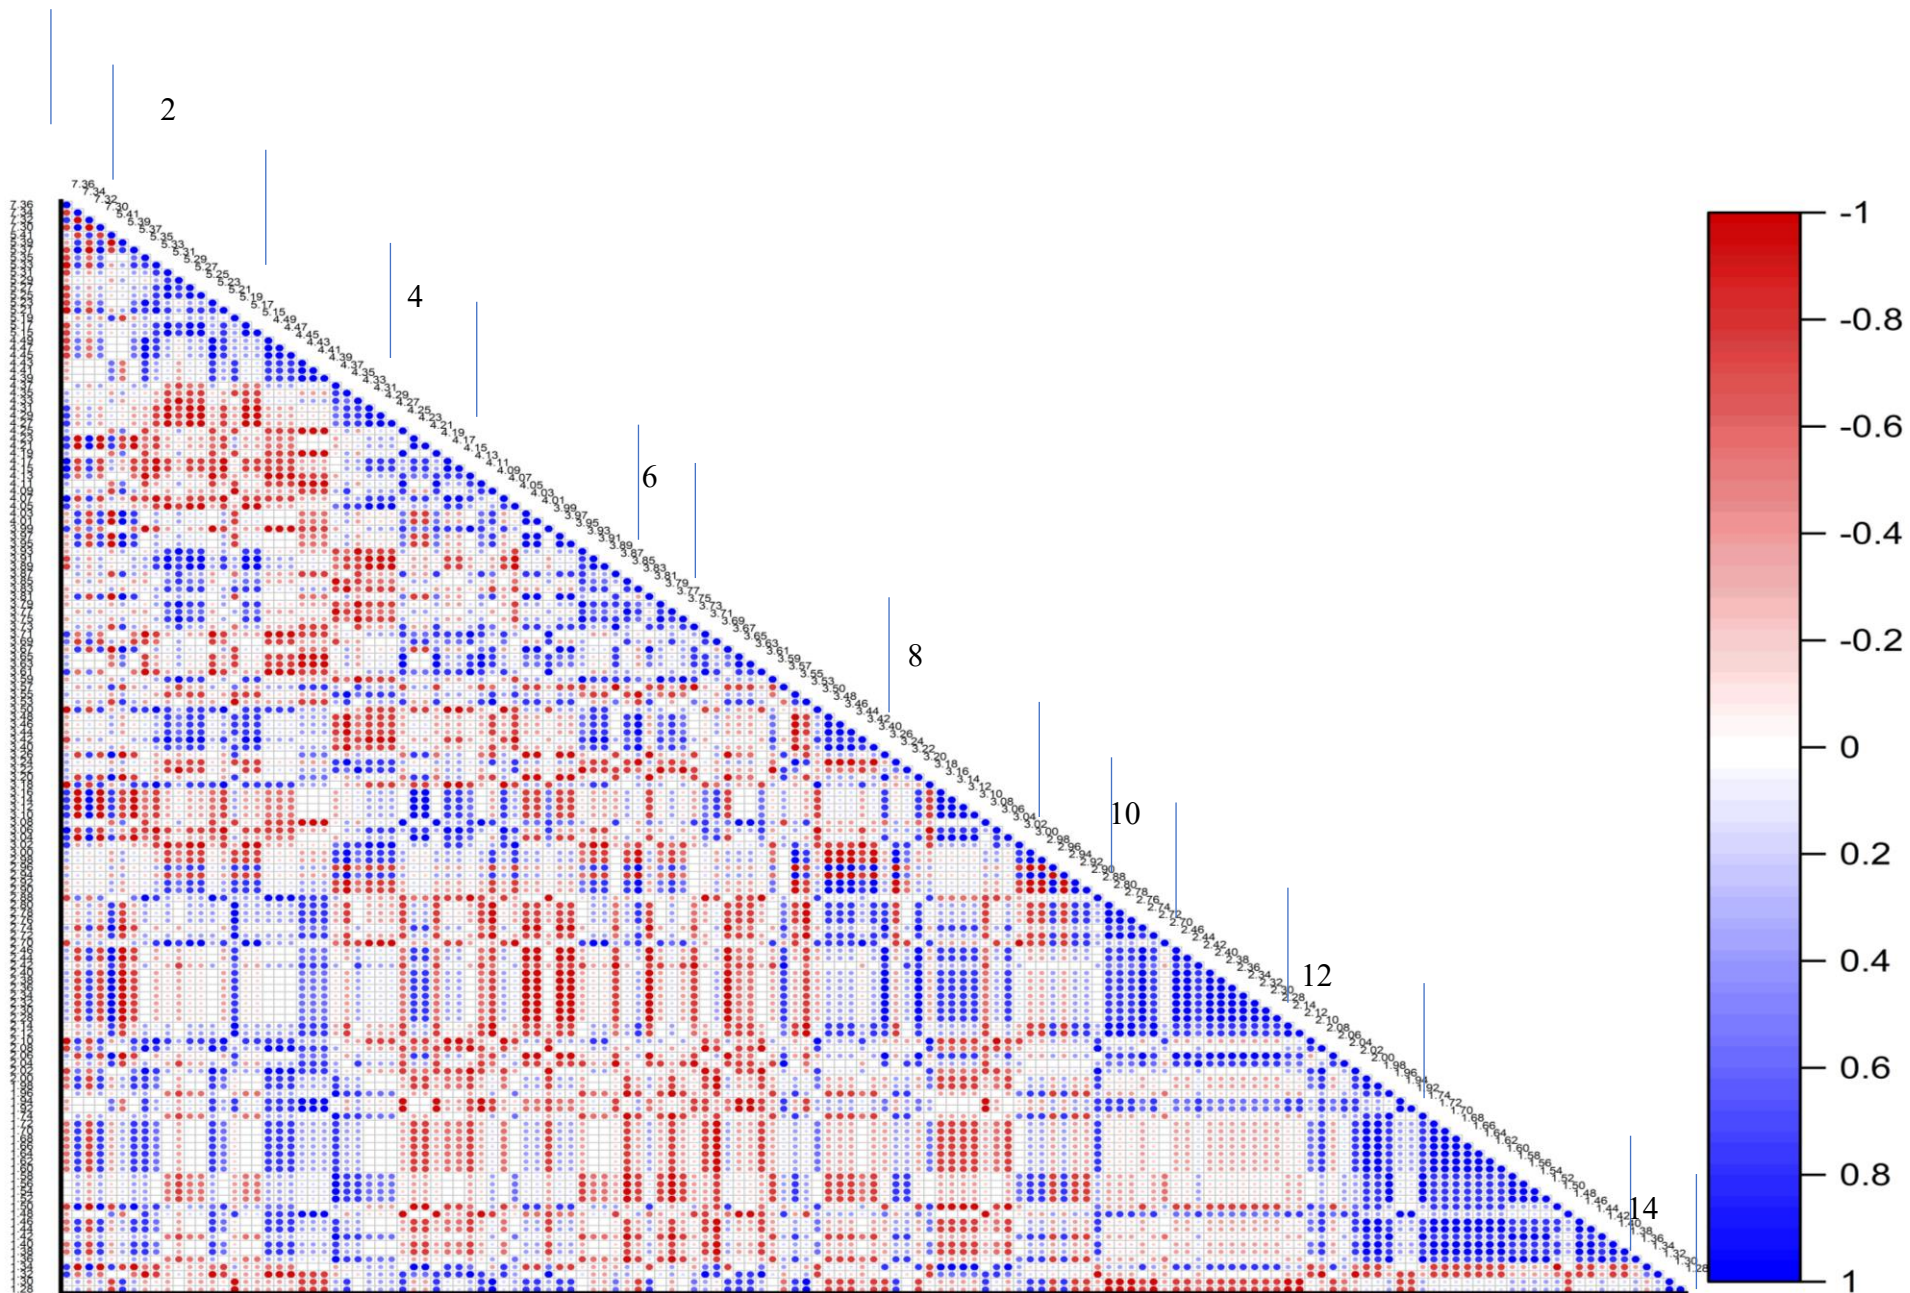

Figure S47. Spearman correlation of group of metabolites present in regions 1-14 of variable nitrate ( $0.05 - 0.2 \text{ g L}^{-1}$ ) in differentiation phase.

**Box S7: Spearman correlation between three phases in variable phosphate**

In variable phosphate metabolites in regions 5-8 showed a positive correlation in the vegetative and determination phase as well regions 13-14 showed a positive correlation in all three phases. A negative correlation was found between regions (4-8 and 13-14) in the vegetative and determination phase (Fig. S48, S49, S50). In case of variable phosphate in vegetative phase positive correlation found between metabolites in regions 4-7, 10-14 but negative correlation found between 4-7 and 8-14 (Fig. S48). In case of determination phase positive correlation found between metabolites in regions 3-6, 8, 11-12, 12-14. Negative correlation found between regions 11-12 and 13 (Fig. S49). In case of differentiation phase positive correlation found between metabolites in regions 3,5,9-11,12-13 (Fig. S50).



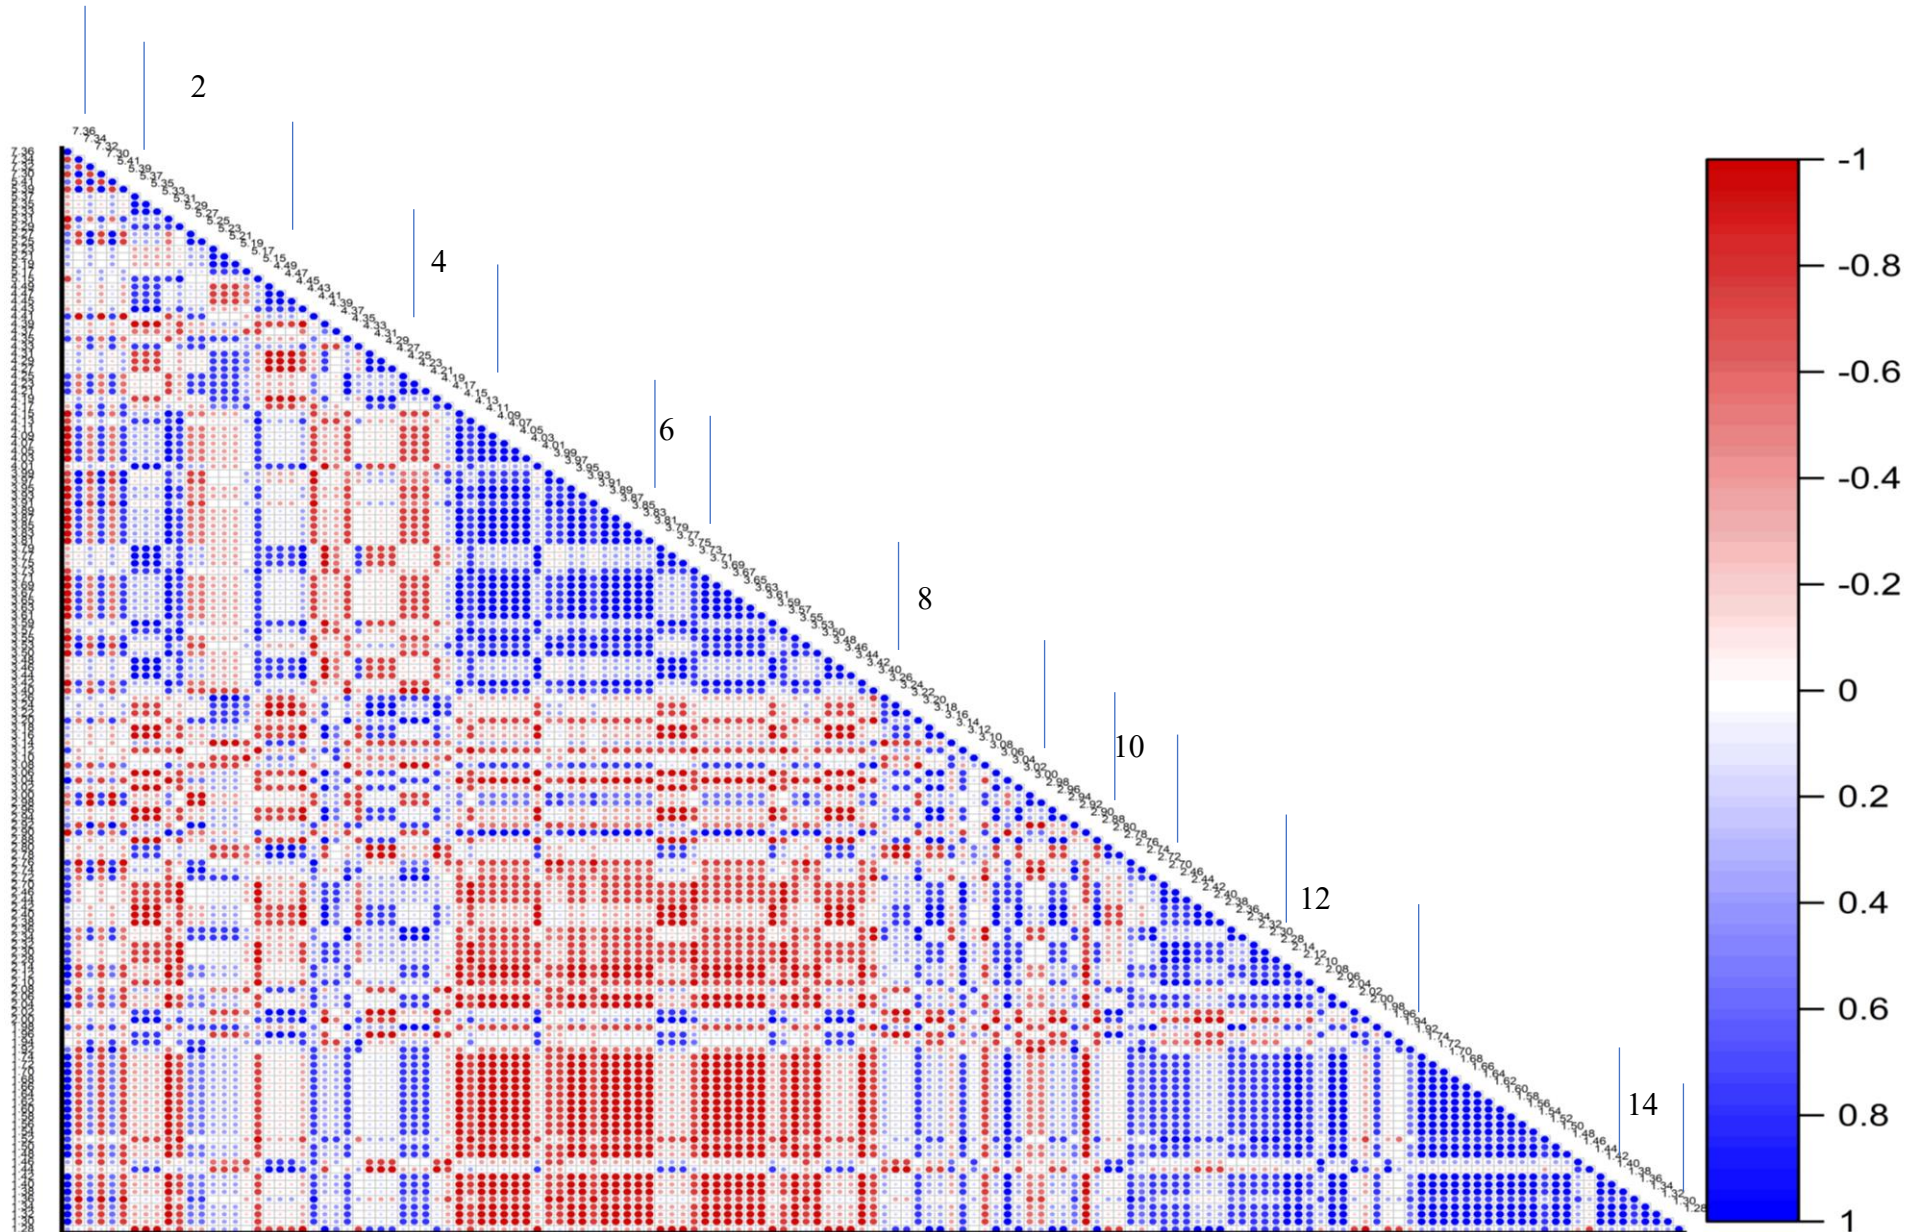

Figure S48. Spearman correlation of group of metabolites present in regions 1-14 of variable phosphate ( $0.05 - 0.2 \text{ g L}^{-1}$ ) in vegetative phase.

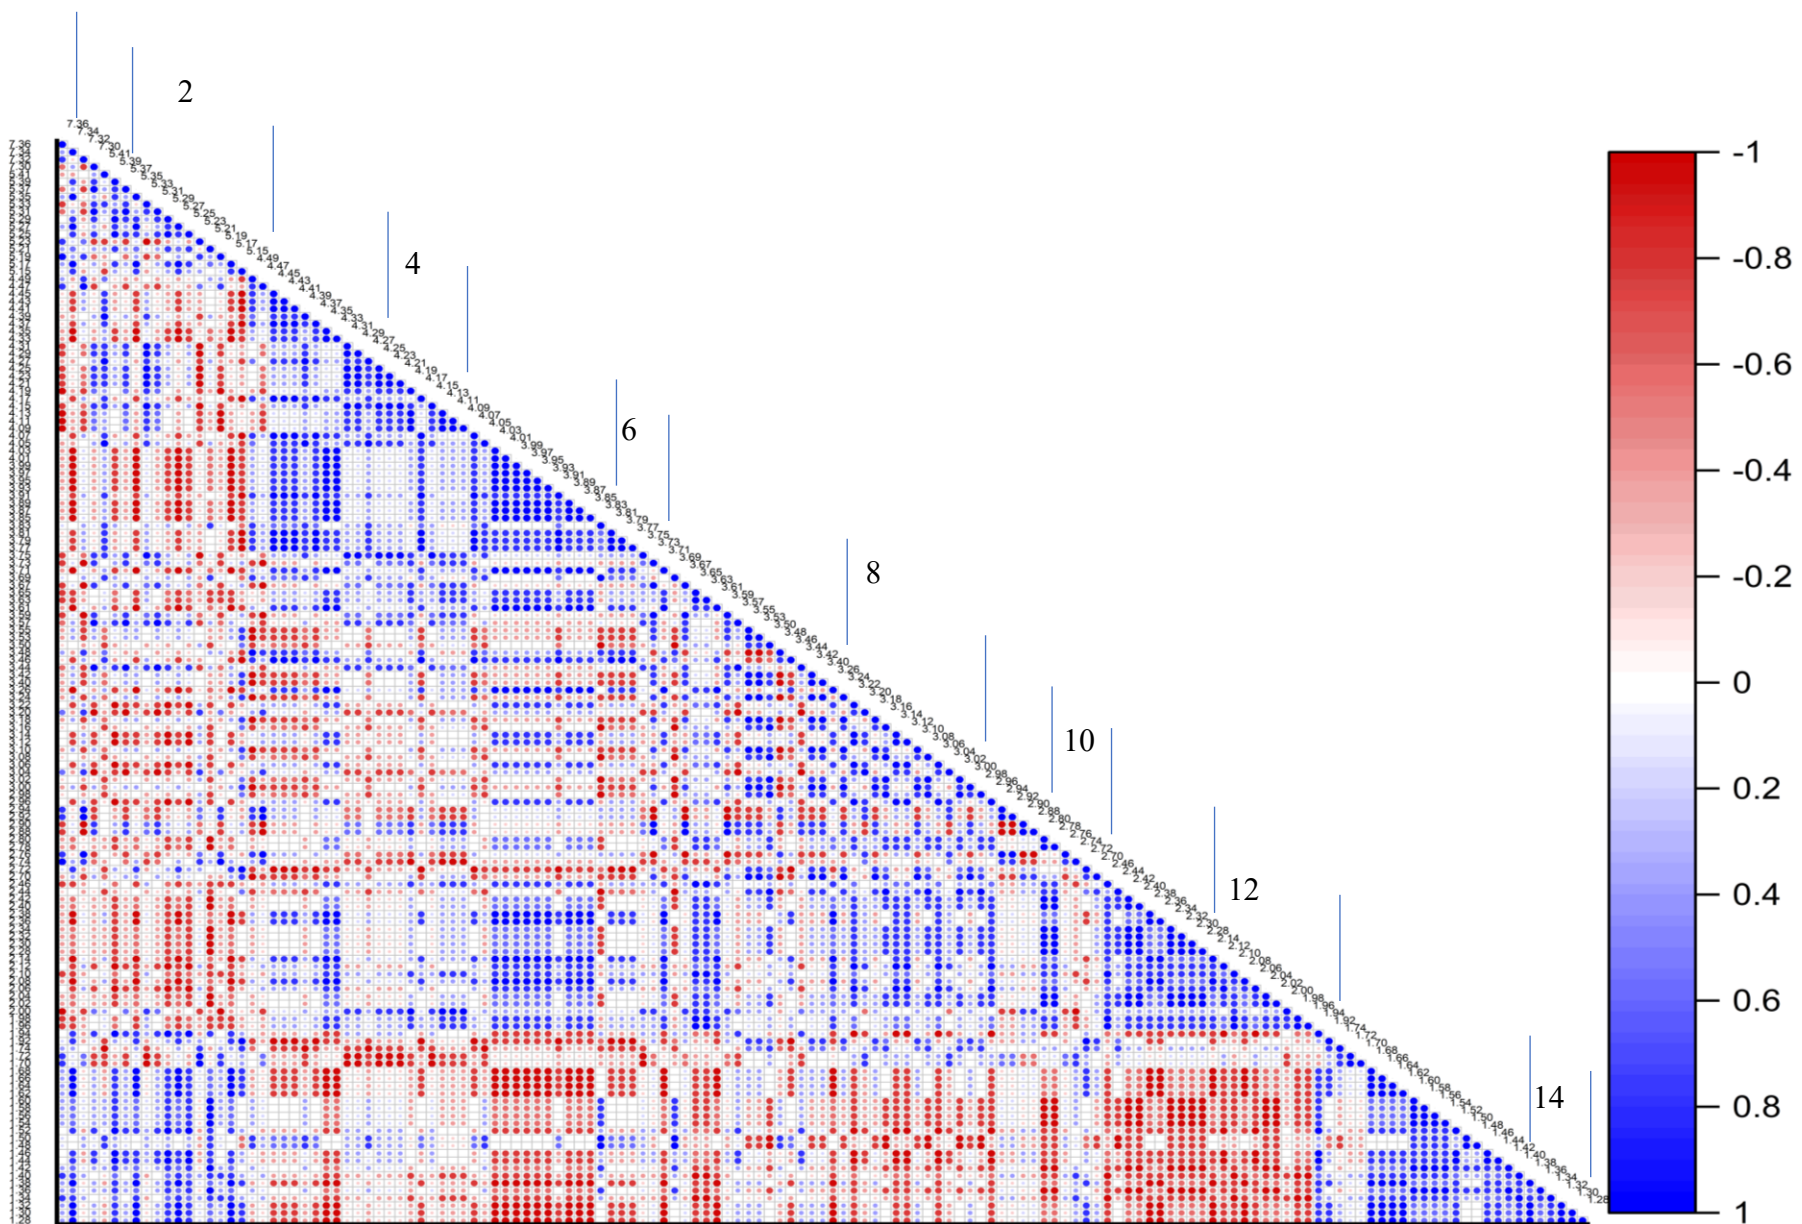

Figure S49. Spearman correlation of group of metabolites present in regions 1-14 of variable phosphate ( $0.05 - 0.2 \text{ g L}^{-1}$ ) in determination phase.



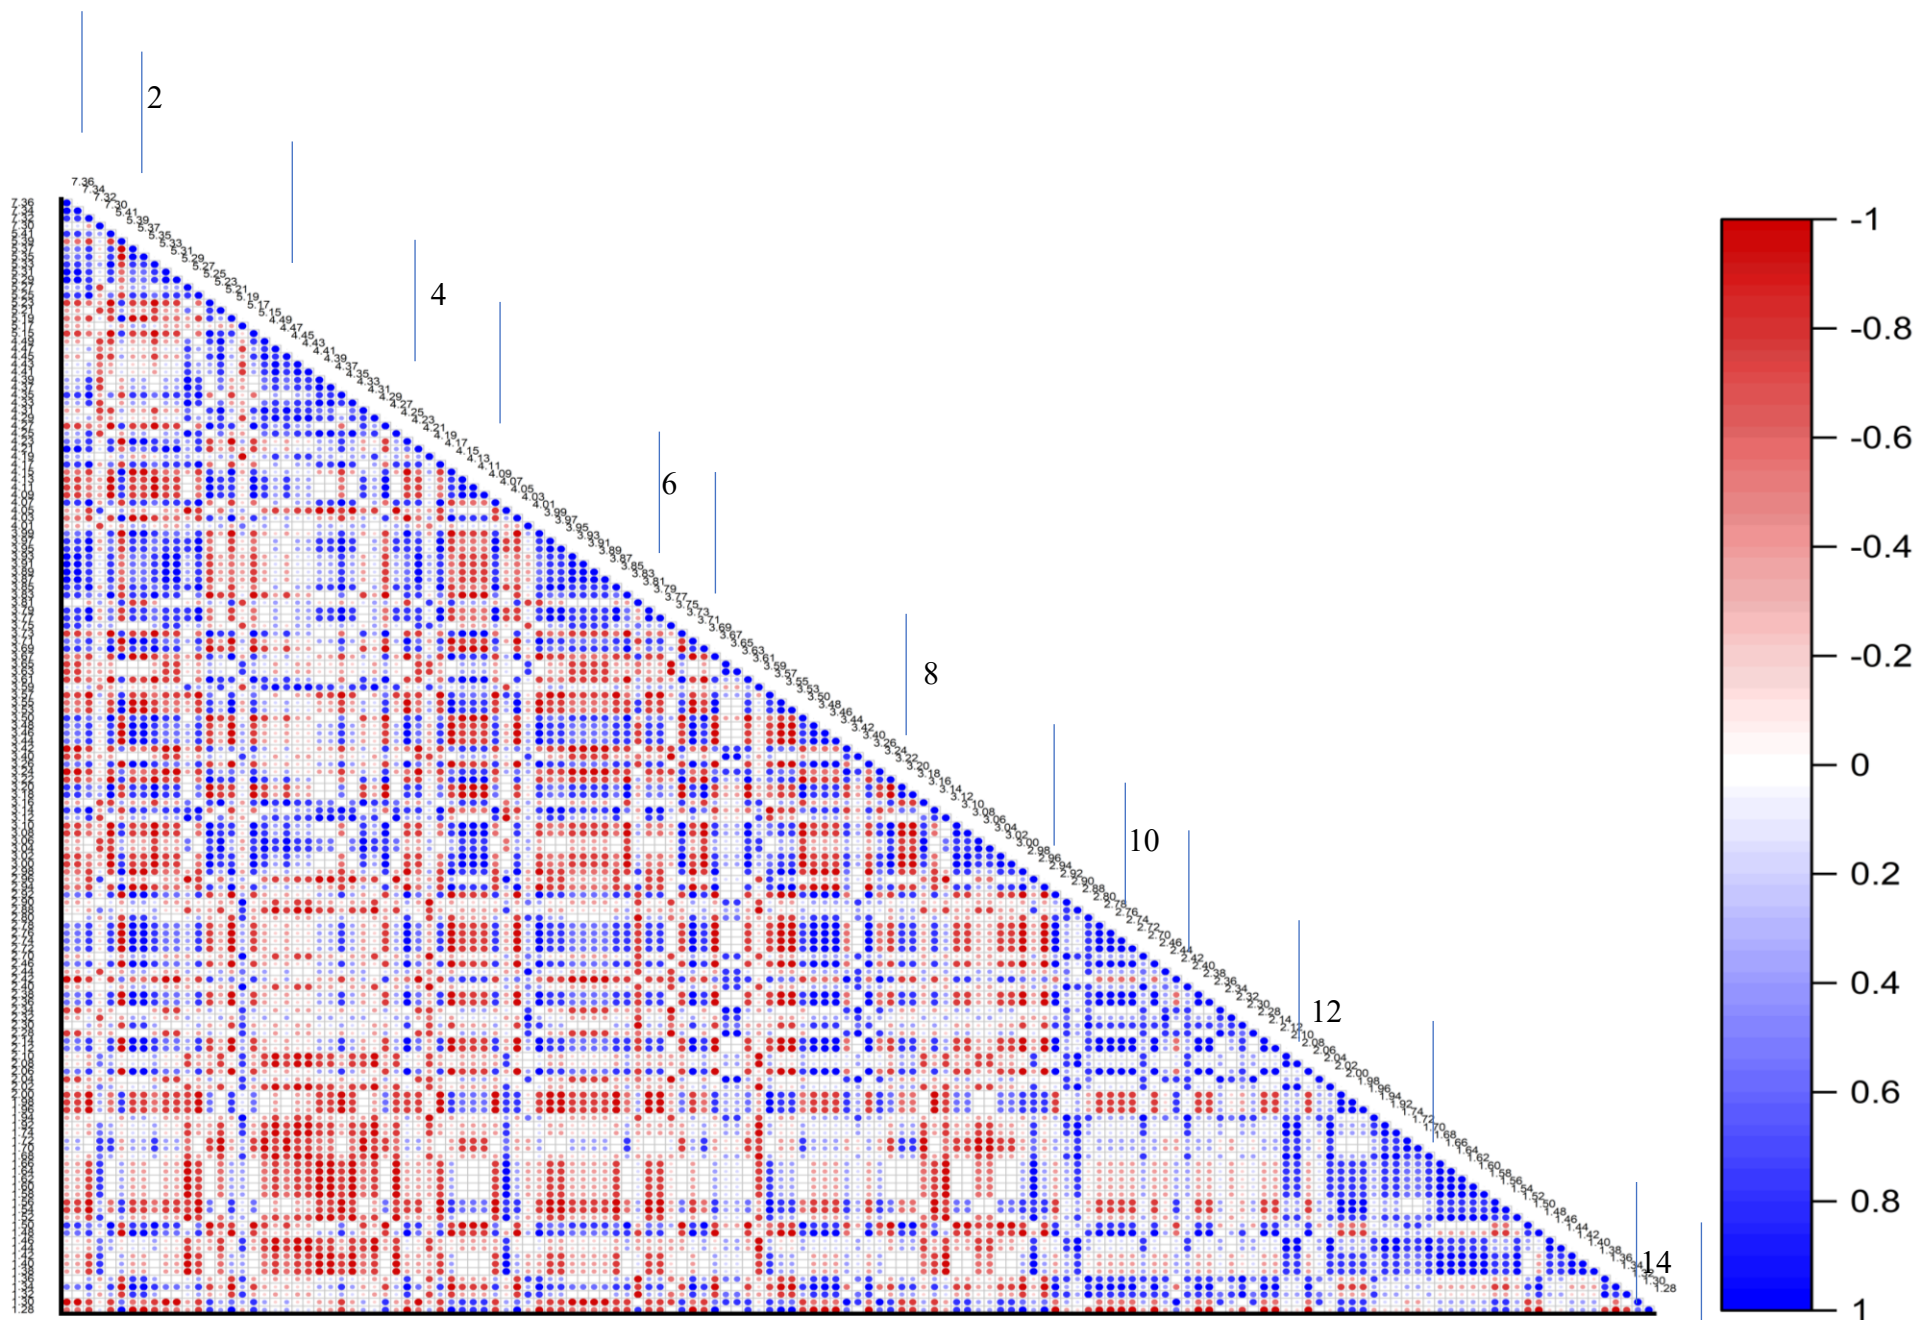

Figure S50. Spearman correlation of group of metabolites present in regions 1-14 of variable phosphate (0.05 - 0.2 g L<sup>-1</sup>) in differentiation phase

Table S1. Composition of Erdschreiber seawater (ESS) culture medium

1. NaNO<sub>3</sub>: 10g/100ml

2. Na<sub>2</sub>HPO<sub>4</sub>: 2g/100 ml

3. PI Metal Stock Stock Solution:

| <b>Composition</b>                                        |   | <b>Mg</b> |
|-----------------------------------------------------------|---|-----------|
| EDTA-Na <sub>2</sub>                                      | : | 0.003     |
| FeCl <sub>3</sub> .6H <sub>2</sub> O (FeCl <sub>3</sub> ) | : | 387       |
| MnCl <sub>2</sub> .4H <sub>2</sub> O                      | : | 232.25    |
| ZnCl <sub>2</sub>                                         | : | 432       |
| CoCl <sub>2</sub> .6 H <sub>2</sub> O                     | : | 12        |
| CuSO <sub>4</sub> .5 H <sub>2</sub> O                     | : | 5         |
| Na <sub>2</sub> MoO <sub>4</sub> .2H <sub>2</sub> O       | : | 126       |
| H <sub>3</sub> PO <sub>4</sub>                            | : | 3.53      |

Volume upto 1 litre made up by adding distilled water

These three stock solutions were autoclaved and stored in amber bottles.

1ml from each three stock solutions added in 997ml filtered autoclaved seawater to make 1 litre of ESS media.

**Box S1: PCR reaction mixture (25µl)**

Add 1 µl of template DNA, 2.5 mM dNTP's, 10 pM of each primer, 3.2 mM MgCl<sub>2</sub>, 2.5 µl 10x reaction buffer and 1.25 units of Taq DNA polymerase. The mixture was vortexed and ran in a Biorad thermocycler (M/s. Biorad MyCycler, USA) following the protocol: initial denaturation at 94°C for 3 min, followed by 30 cycles of 1 min at 94°C, 2 min at 45°C and 2 min at 65°C. The amplified product was ran on a 1.2% agarose gel containing EtBr to check quality. The rbcL-forward and rbcL-reverse green seaweed, specific primers sequences were 5'-GCTGGWGTA AAAAGATTAYCG-3' and 5'-TCACGCCAACGCATRAASGG-3' respectively.

Table S2. Metabolites of interest identified in *Ulva ohnoi* using  $^1\text{H}$  NMR.

| Spectral bin in $^1\text{H}$ NMR spectra | Metabolites                     |
|------------------------------------------|---------------------------------|
| 1.34                                     | Lactate                         |
| 1.38                                     | Threonine                       |
| 1.48                                     | Alanine                         |
| 1.92                                     | Acetate                         |
| 2.04                                     | Proline                         |
| 2.14                                     | Glutamic acid                   |
| 2.36                                     | $\alpha$ -ketoglutaric acid     |
| 2.42                                     | Succinic acid                   |
| 2.74                                     | Malic acid                      |
| 2.98                                     | Cysteine                        |
| 3.00                                     | $\gamma$ -Amino-butyrate (GABA) |
| 3.10                                     | Creatinine                      |
| 3.16                                     | Isethionic acid                 |
| 3.20                                     | Betaine                         |
| 3.40                                     | Triethanoalmine                 |
| 3.48                                     | Hypotaurine                     |
| 3.50                                     | Choline                         |
| 3.55                                     | Glycine                         |
| 3.65                                     | Coniferyl aldehyde              |
| 3.75                                     | Glucose                         |
| 3.71                                     | sorbitol                        |
| 3.81                                     | Acetylcholine                   |
| 3.83                                     | Sucrose                         |
| 3.85                                     | Creatine                        |
| 3.89                                     | Aspartate                       |
| 3.91                                     | Ethanolamine                    |
| 4.01                                     | Galactose                       |
| 4.11                                     | L-Cysteinesulfinic acid         |
| 4.17                                     | lactic acid                     |
| 7.32                                     | Tryptophan                      |



### **Box S11: Metabolites variation between phases from NMR data**

Table S3, S4 and S5 showed that effect of variable abiotic conditions on metabolite variations during the transition of phases showed that amino acids tryptophan and tyrosine in region 1 [7.29 -7.37 ppm (5)] increased (0.41-1.66) in average in all variable conditions from vegetative to differentiation phase. Galactose and sucrose in region 2 [5.15-5.41 ppm (13)] increased (0.02- 0.13) in average in variable salinity, temperature, light intensity and phosphate but decreased (0.46-0.03) in photoperiod and nitrate from vegetative to differentiation phase. Likewise, the amount of glucose in region 3 [4.29 - 4.49 ppm (11)] decreased in average (0.54-0) in all conditions except it increased (0.06-0.16) in light intensity. Lactic acid, 5-hydroxy methyl uracil in region 4 [4.13 - 4.27 (8)] decreased in average (4.10-0.45) in salinity, temperature, photoperiod, nitrate and phosphate but increased in average (1.17-1.31) in light intensity from vegetative to differentiation phase. Sucrose, threonine, lactate, betaine, cysteine, creatinine, isethionic acid, aspartate, creatine, triethanol amine, ethanolamine, l-Cysteinesulfinic acid in region 5 [3.83 - 4.10 ppm (14)] increased in average (2.12-3.43) in variable salinity, light intensity, nitrate and phosphate but decreased (4.72-2.81) in temperature, photoperiod. glucose, sorbitol, acetylcholine in region 6 [3.76 - 3.82 ppm (4)] increased (5.42-9.98) in variable salinity, light intensity, phosphate but decreased (11.30-8.31) in temperature, photoperiod and nitrate. Triethanolamine, glucose, alanine, coniferyl aldehyde, glycine, choline, hypotaurine in region 7 [ 3.40 -3.74 ppm (18)] increased in average (4.71-5.73) in salinity, light intensity but decreased (5.85-4.64) in rest all conditions. acetylcholine, choline, betaine, isethionic acid, creatinine, aspartate,  $\alpha$ -ketoglutaric acid in region 8 [3.00-3.28 ppm (15)] increased in average (1.30-2.79) in variable photoperiod, nitrate, phosphate but decreased (2.04-1.36) in salinity, temperature and light intensity. Cysteine, creatinine in region 9 [2.88-2.98 ppm (6)] increased in average (12.58-22.97) in all conditions. Aspartate, hypotaurine, l-cysteinesulfinic acid in region 10 [ 2.70-2.80 ppm (6)] increased in average (2.52-7.51) in variables of all conditions except it decreased (4.31-0.64) in nitrate and phosphate. Succinic acid, glutamine, glutamic acid, proline,  $\alpha$ -ketoglutaric acid in region 11 [2.28 -2.46 ppm (10)] decreased in average (0.79-0.26) in all conditions but increased (0.07-1.42) in photoperiod. Acetylcholine, glutamic acid, proline, acetate in region 12 [1.91-2.22 ppm (16)] decreased in average (1.52-0.54) in variable salinity, light intensity but increased (0.08-1.42) in rest all conditions. Alanine in region 13 [1.38- 1.73 ppm (18)] decreased in average (1.05-0.29) in variable salinity, light intensity, phosphate but increased (0.15-1.12) in temperature, photoperiod, nitrate. Threonine, lactate in region 14 [1.27-1.38 ppm (6)] decreased in average (6.39-2.37) from vegetative to differentiation phase in all conditions.

Table S3. Combined average and SD of the range of bins in region 1 to 14 in vegetative phase.

| Region No. | Bin range        | Salinity<br>(20 - 35 PSU) |      | Temperature<br>(20 - 35°C) |      | Photoperiod<br>(18:6, 12:12 and<br>6:18 D/N) |      | light intensity<br>(220, 350 and 500<br>$\mu\text{mol photons m}^{-2}$<br>$\text{s}^{-1}$ ) |      | Nitrate<br>(0.05 - 0.2 g L <sup>-1</sup> ) |      | Phosphate<br>(0.05 - 0.2 g L <sup>-1</sup> ) |      |
|------------|------------------|---------------------------|------|----------------------------|------|----------------------------------------------|------|---------------------------------------------------------------------------------------------|------|--------------------------------------------|------|----------------------------------------------|------|
|            |                  | Avg                       | SD   | Avg                        | SD   | Avg                                          | SD   | Avg                                                                                         | SD   | Avg                                        | SD   | Avg                                          | SD   |
| Region 1   | 7.29 -7.37 (5)   | 0.76                      | 0.21 | 0.41                       | 0.15 | 0.79                                         | 0.64 | 1.22                                                                                        | 0.27 | 0.58                                       | 0.30 | 0.70                                         | 0.32 |
| Region 2   | 5.15 -5.41 (13)  | 0.02                      | 0.08 | 0.02                       | 1.16 | 0.46                                         | 0.70 | 0.14                                                                                        | 0.04 | 0.11                                       | 0.11 | 0.07                                         | 0.14 |
| Region 3   | 4.29 - 4.49 (11) | 0.29                      | 0.21 | 0.46                       | 0.51 | 0.54                                         | 0.65 | 0.06                                                                                        | 0.24 | 0.28                                       | 0.17 | 0.36                                         | 0.17 |
| Region 4   | 4.13 - 4.27 (8)  | 2.13                      | 0.50 | 0.46                       | 0.61 | 4.10                                         | 0.71 | 1.17                                                                                        | 0.19 | 3.24                                       | 0.73 | 2.89                                         | 0.82 |
| Region 5   | 3.83 - 4.10 (14) | 2.85                      | 0.61 | 3.89                       | 1.06 | 4.72                                         | 1.23 | 2.12                                                                                        | 0.27 | 3.83                                       | 0.79 | 3.80                                         | 1.06 |
| Region 6   | 3.76 - 3.82 (4)  | 7.79                      | 0.96 | 10.24                      | 4.00 | 11.30                                        | 3.16 | 5.42                                                                                        | 0.83 | 10.48                                      | 2.22 | 8.67                                         | 1.52 |
| Region 7   | 3.40 -3.74(18)   | 5.57                      | 0.68 | 5.85                       | 1.58 | 7.47                                         | 2.48 | 4.71                                                                                        | 0.47 | 6.83                                       | 1.18 | 6.73                                         | 2.27 |
| Region 8   | 3.00 -3.28 (15)  | 2.04                      | 0.34 | 1.53                       | 0.49 | 1.30                                         | 1.58 | 2.04                                                                                        | 0.39 | 1.72                                       | 0.59 | 1.69                                         | 1.69 |
| Region 9   | 2.88 -2.98(6)    | 16.31                     | 2.69 | 12.58                      | 3.34 | 12.72                                        | 6.77 | 19.95                                                                                       | 2.53 | 13.43                                      | 3.11 | 14.93                                        | 5.66 |
| Region 10  | 2.70-2.80 (6)    | 5.09                      | 0.81 | 3.90                       | 1.17 | 2.52                                         | 2.65 | 6.18                                                                                        | 0.79 | 4.31                                       | 2.05 | 3.52                                         | 2.51 |
| Region 11  | 2.28 -2.46 (10)  | 0.77                      | 0.23 | 0.79                       | 0.39 | 0.07                                         | 1.02 | 1.13                                                                                        | 0.29 | 0.67                                       | 0.54 | 0.65                                         | 0.33 |
| Region 12  | 1.91 -2.22 (16)  | 1.00                      | 0.34 | 0.96                       | 0.58 | 0.08                                         | 0.74 | 1.52                                                                                        | 0.39 | 0.74                                       | 0.53 | 0.79                                         | 0.38 |
| Region 13  | 1.39-1.73 (18)   | 0.71                      | 0.31 | 0.54                       | 0.37 | 0.15                                         | 0.40 | 1.05                                                                                        | 0.28 | 0.46                                       | 0.36 | 0.53                                         | 0.36 |
| Region 14  | 1.27-1.38 (6)    | 6.39                      | 1.87 | 4.04                       | 1.26 | 5.48                                         | 4.58 | 5.99                                                                                        | 1.84 | 4.08                                       | 1.60 | 4.30                                         | 1.86 |

Table S4. Combined average and SD of the range of bins in region 1 to 14 in determination phase.

| Region No. | Bin range        | Salinity<br>(20 - 35 PSU) |      | Temperature<br>(20 - 35 °C) |      | Photoperiod<br>(18:6, 12:12<br>and 6:18 D/N) |      | light intensity<br>(220, 350 and 500<br>$\mu\text{mol photons m}^{-2} \text{s}^{-1}$ ) |       | Nitrate<br>(0.05 - 0.2 g L <sup>-1</sup> ) |      | Phosphate<br>(0.05 - 0.2 g L <sup>-1</sup> ) |      |
|------------|------------------|---------------------------|------|-----------------------------|------|----------------------------------------------|------|----------------------------------------------------------------------------------------|-------|--------------------------------------------|------|----------------------------------------------|------|
|            |                  | Avg                       | SD   | Avg                         | SD   | Avg                                          | SD   | Avg                                                                                    | SD    | Avg                                        | SD   | Avg                                          | SD   |
| Region 1   | 7.29 -7.37 (5)   | 1.09                      | 0.41 | 1.00                        | 0.21 | 1.42                                         | 0.55 | 1.20                                                                                   | 0.68  | 1.02                                       | 0.44 | 1.53                                         | 0.57 |
| Region 2   | 5.15 -5.41 (13)  | 0.13                      | 0.31 | 0.06                        | 0.11 | 0.03                                         | 0.09 | 0.00                                                                                   | 0.08  | 0.10                                       | 0.17 | 0.03                                         | 0.09 |
| Region 3   | 4.29 - 4.49 (11) | 0.37                      | 0.65 | 0.21                        | 0.17 | 0.11                                         | 0.09 | 0.05                                                                                   | 0.10  | 0.11                                       | 0.24 | 0.07                                         | 0.19 |
| Region 4   | 4.13 - 4.27 (8)  | 1.67                      | 0.88 | 2.01                        | 0.71 | 1.14                                         | 0.37 | 0.83                                                                                   | 0.37  | 1.77                                       | 0.45 | 0.45                                         | 0.36 |
| Region 5   | 3.84 - 4.10 (14) | 2.88                      | 0.61 | 3.15                        | 0.86 | 2.50                                         | 0.66 | 1.82                                                                                   | 0.77  | 4.35                                       | 0.92 | 2.90                                         | 0.57 |
| Region 6   | 3.76 - 3.82 (4)  | 7.80                      | 1.60 | 9.44                        | 2.64 | 7.27                                         | 2.25 | 4.98                                                                                   | 1.97  | 10.52                                      | 1.80 | 8.19                                         | 1.67 |
| Region 7   | 3.40 -3.74(18)   | 5.17                      | 1.06 | 5.59                        | 1.20 | 4.96                                         | 1.05 | 4.02                                                                                   | 1.91  | 6.06                                       | 1.46 | 4.99                                         | 1.16 |
| Region 8   | 3.00 -3.28 (15)  | 1.87                      | 0.47 | 1.55                        | 0.56 | 1.72                                         | 0.65 | 1.95                                                                                   | 1.07  | 1.95                                       | 0.62 | 1.93                                         | 0.64 |
| Region 9   | 2.88 -2.98(6)    | 17.87                     | 3.52 | 16.51                       | 2.47 | 19.48                                        | 5.31 | 19.22                                                                                  | 10.09 | 17.33                                      | 3.00 | 21.19                                        | 8.84 |
| Region 10  | 2.70-2.80 (6)    | 5.89                      | 2.00 | 5.12                        | 1.02 | 8.37                                         | 8.91 | 6.39                                                                                   | 3.85  | 5.25                                       | 1.83 | 6.90                                         | 2.63 |
| Region 11  | 2.28 -2.46 (10)  | 1.02                      | 0.53 | 1.06                        | 0.76 | 0.86                                         | 0.59 | 0.67                                                                                   | 0.47  | 0.61                                       | 0.63 | 1.08                                         | 0.72 |
| Region 12  | 1.91 -2.22 (16)  | 1.06                      | 0.45 | 1.43                        | 1.05 | 1.08                                         | 0.54 | 1.48                                                                                   | 0.84  | 0.53                                       | 0.48 | 1.04                                         | 0.69 |
| Region 13  | 1.39-1.73 (18)   | 0.57                      | 0.40 | 0.52                        | 0.38 | 0.51                                         | 0.36 | 0.44                                                                                   | 0.48  | 0.15                                       | 0.21 | 0.29                                         | 0.30 |
| Region 14  | 1.37- 1.27 (6)   | 4.41                      | 1.62 | 4.72                        | 2.35 | 3.56                                         | 1.31 | 3.73                                                                                   | 2.25  | 1.92                                       | 0.74 | 2.77                                         | 0.97 |

Table S5. Combined average and SD of the range of bins in region 1 to 14 in differentiation phase.

| Region No. | Bins             | Salinity<br>(20 - 35 PSU) |       | Temperature<br>(20 - 35°C) |       | Photoperiod<br>(18:6, 12:12 and<br>6:18 D/N) |      | light intensity<br>(220, 350 and 500<br>$\mu\text{mol photons m}^{-2} \text{s}^{-1}$ ) |       | Nitrate<br>(0.05 - 0.2 g L <sup>-1</sup> ) |       | Phosphate<br>(0.05 - 0.2 g L <sup>-1</sup> ) |       |
|------------|------------------|---------------------------|-------|----------------------------|-------|----------------------------------------------|------|----------------------------------------------------------------------------------------|-------|--------------------------------------------|-------|----------------------------------------------|-------|
|            |                  | Avg                       | SD    | Avg                        | SD    | Avg                                          | SD   | Avg                                                                                    | SD    | Avg                                        | SD    | Avg                                          | SD    |
| Region 1   | 7.29 -7.37 (5)   | 1.07                      | 0.54  | 1.11                       | 0.59  | 1.66                                         | 0.51 | 1.31                                                                                   | 0.42  | 1.56                                       | 0.69  | 1.13                                         | 0.60  |
| Region 2   | 5.15 -5.41 (13)  | 0.13                      | 0.15  | 0.12                       | 0.24  | 0.06                                         | 0.17 | 0.08                                                                                   | 0.09  | 0.04                                       | 0.25  | 0.08                                         | 0.16  |
| Region 3   | 4.29 - 4.49 (11) | 0.14                      | 0.10  | 0.22                       | 0.25  | -0.22                                        | 0.67 | 0.16                                                                                   | 0.11  | 0.08                                       | 0.23  | 0.12                                         | 0.12  |
| Region 4   | 4.13 - 4.27 (8)  | 1.26                      | 0.46  | 0.96                       | 0.48  | 0.79                                         | 0.46 | 1.31                                                                                   | 0.32  | 1.02                                       | 0.48  | 1.20                                         | 0.39  |
| Region 5   | 3.83 - 4.10 (14) | 3.07                      | 0.77  | 3.09                       | 1.40  | 2.81                                         | 0.98 | 3.20                                                                                   | 0.76  | 3.14                                       | 0.84  | 3.43                                         | 0.90  |
| Region 6   | 3.76 - 3.82 (4)  | 9.98                      | 3.85  | 9.07                       | 4.74  | 8.07                                         | 1.60 | 8.52                                                                                   | 1.71  | 8.31                                       | 2.59  | 9.25                                         | 3.31  |
| Region 7   | 3.40 -3.74(18)   | 5.73                      | 2.64  | 5.01                       | 3.16  | 4.64                                         | 0.85 | 5.16                                                                                   | 1.10  | 4.88                                       | 2.63  | 5.29                                         | 2.68  |
| Region 8   | 3.00 -3.28 (15)  | 1.36                      | 0.75  | 1.38                       | 1.17  | 2.13                                         | 0.60 | 1.80                                                                                   | 0.54  | 2.14                                       | 1.84  | 2.79                                         | 1.91  |
| Region 9   | 2.88 -2.98(6)    | 20.62                     | 24.73 | 16.85                      | 22.43 | 22.97                                        | 4.82 | 21.00                                                                                  | 10.77 | 21.72                                      | 19.80 | 21.77                                        | 18.93 |
| Region 10  | 2.70-2.80 (6)    | 6.00                      | 10.11 | 4.23                       | 7.93  | 7.51                                         | 1.24 | 6.85                                                                                   | 2.10  | 0.64                                       | 3.32  | 2.59                                         | 4.08  |
| Region 11  | 2.28 -2.46 (10)  | 0.27                      | 0.54  | 0.76                       | 1.12  | 1.42                                         | 1.22 | 1.01                                                                                   | 0.50  | 0.26                                       | 1.04  | 0.45                                         | 0.60  |
| Region 12  | 1.91 -2.22 (16)  | 0.54                      | 0.57  | 1.15                       | 0.98  | 1.42                                         | 1.08 | 0.93                                                                                   | 0.41  | 1.26                                       | 0.80  | 0.86                                         | 0.54  |
| Region 13  | 1.39-1.73 (18)   | 0.34                      | 0.35  | 0.65                       | 0.71  | 0.32                                         | 0.29 | 0.29                                                                                   | 0.25  | 1.12                                       | 1.00  | 0.45                                         | 0.50  |
| Region 14  | 1.27-1.38 (6)    | 4.22                      | 2.82  | 2.44                       | 2.32  | 2.49                                         | 0.95 | 3.48                                                                                   | 1.28  | 3.28                                       | 1.87  | 2.37                                         | 1.09  |

### **Box S8: Spearman correlation among metabolites in vegetative phase with degree of correlation**

In the vegetative phase (Fig. 4a, Table S6 in the supportive information) tryptophan displayed a very strong positive correlation with  $\gamma$ -Amino-butyrate (GABA), lactate, cysteine (0.83). Galactose and glycine displayed a very strong positive correlation with glucose and Coniferyl aldehyde (0.94), lactic acid, aspartate and acetylcholine (0.83). The moderate correlation of L-Cysteinesulfinic acid found with creatine (0.77). Lactic acid showed a very strong positive correlation with aspartate (0.83) and creatine (0.94). An ethanolamine showed a moderate correlation with lactic acid (0.77) and aspartate (0.71). Creatine showed a very strong positive correlation with aspartate (0.94), ethanolamine, glucose (0.83) but moderately correlated with L-Cysteinesulfinic acid, galactose (0.77). Sucrose showed a very strong positive correlation with ethanolamine, creatine (0.94), aspartate (0.89), lactic acid, acetylcholine (0.83). An acetylcholine showed a very strong positive correlation with creatine (0.94), aspartate (0.83), galactose (0.83) but showed a moderate correlation with ethanolamine (0.77). Sorbitol showed a very strong positive correlation with lactic acid and acetylcholine (0.83) but a moderate correlation with creatine (0.71). Glucose showed a very strong positive correlation with lactic acid, L-Cysteinesulfinic acid, galactose, acetylcholine (0.94), coniferyl aldehyde (0.89) while moderate correlation with aspartate, sorbitol (0.77). Glycine showed a very strong positive correlation with glucose, Coniferyl aldehyde (0.94), lactic acid (0.83), aspartate (0.83), acetylcholine (0.83) but moderate correlation with creatine (0.77). Betaine displayed a very strong positive correlation with creatinine (0.83), malic acid, glutamic acid (0.89) while a moderate correlation with glutamine, proline (0.77). Creatinine exhibited a very strong positive correlation with alanine, malic acid (0.89), succinic acid (0.94). Malic acid showed a very strong positive correlation with glutamic acid (0.83) but a moderate correlation with glutamine and proline (0.71). Succinic acid showed a very strong positive correlation with malic acid (0.94), acetate (0.83) and a moderate correlation with betaine (0.77).  $\alpha$ -ketoglutaric acid showed a very strong positive correlation with malic acid (0.83) and a moderate correlation with succinic acid (0.71). Glutamic acid showed a moderate correlation with succinic acid (0.77), creatinine (0.71). Proline showed a very strong positive correlation with glutamic acid (0.94). Glutamine showed a very strong positive correlation with glutamic acid. Galactose showed a very strong positive correlation with lactic acid (0.83), aspartate (0.83). Acetate showed a moderate correlation with hypotaurine, creatinine, glutamic acid (0.71). Alanine showed a very strong positive correlation with acetate (0.94), succinic acid (0.94), malic acid (0.83), glutamic acid (0.83). Lactate showed a very strong positive correlation with threonine (0.83).

Table S6. Spearman correlation among metabolites in vegetative phase with degree of correlation.

| Metabolites             | Correlated metabolites                                         | Perfect correlation (1) | Very strong correlation (+0.9) | Very strong correlation (+0.8) | Strong correlation (+0.7) |
|-------------------------|----------------------------------------------------------------|-------------------------|--------------------------------|--------------------------------|---------------------------|
| Tryptophan              | $\gamma$ -Amino-butyrate (GABA), Cysteine, lactate             | -                       | -                              | 0.83                           | -                         |
| lactic acid             | L-Cysteinesulfinic acid, galactose                             | -                       | -                              | 0.83                           | -                         |
| L-Cysteinesulfinic acid | Galactose, glycine                                             | 1                       | -                              | -                              | -                         |
| Ethanolamine            | Lactic acid                                                    | -                       | -                              | -                              | 0.77                      |
| Ethanolamine            | Aspartate                                                      | -                       | -                              | -                              | 0.71                      |
| Aspartate               | Lactic acid, L-Cysteinesulfinic acid, galactose, acetylcholine | -                       | -                              | 0.83                           | -                         |
| Creatine                | Lactic acid, aspartate                                         | -                       | 0.94                           | -                              | -                         |
| Creatine                | Ethanolamine, glucose                                          | -                       | -                              | 0.83                           | -                         |
| Creatine                | L-Cysteinesulfinic acid, galactose                             | -                       | -                              | -                              | 0.77                      |
| Sucrose                 | Ethanolamine, creatine                                         | -                       | 0.94                           | -                              | -                         |
| Sucrose                 | Lactic acid, acetylcholine                                     | -                       | -                              | 0.83                           | -                         |
| Sucrose                 | Aspartate                                                      | -                       | -                              | 0.89                           | -                         |
| Acetylcholine           | L-Cysteinesulfinic acid, galactose                             | -                       | -                              | 0.83                           | -                         |
| Acetylcholine           | Lactic acid                                                    | 1                       | -                              | -                              | -                         |
| Acetylcholine           | Creatine                                                       | -                       | 0.94                           | -                              | -                         |
| Acetylcholine           | Ethanolamine                                                   | -                       | -                              | -                              | 0.77                      |
| Sorbitol                | Lactic acid, acetylcholine                                     | -                       | -                              | 0.83                           | -                         |
| Sorbitol                | Creatine                                                       | -                       | -                              | -                              | 0.71                      |
| Glucose                 | Coniferyl aldehyde                                             | -                       | -                              | 0.89                           | -                         |
| Glucose                 | lactic acid, L-Cysteinesulfinic acid, galactose, acetylcholine | -                       | 0.94                           | -                              | -                         |
| Glucose                 | Aspartate, sorbitol                                            | -                       | -                              | -                              | 0.77                      |
| Coniferyl aldehyde      | L-Cysteinesulfinic acid, galactose                             | -                       | 0.94                           | -                              | -                         |

|                                 |                                        |   |      |      |      |
|---------------------------------|----------------------------------------|---|------|------|------|
| Coniferyl aldehyde              | Lactic acid, acetylcholine             | - | -    | -    | 0.71 |
| Glycine                         | Galactose                              | 1 | -    | -    | -    |
| Glycine                         | Glucose, Coniferyl aldehyde            | - | 0.94 | -    | -    |
| Glycine                         | Lactic acid, aspartate, acetylcholine  | - | -    | 0.83 | -    |
| Glycine                         | Creatine                               | - | -    | -    | 0.77 |
| Betaine                         | Glutamine, proline                     | - | -    | -    | 0.77 |
| Isethionic acid                 | Choline                                | 1 | -    | -    | -    |
| Creatinine                      | Betaine                                | - | -    | 0.83 | -    |
| Creatinine                      | Alanine                                | - | -    | 0.89 | -    |
| $\gamma$ -Amino-butyrate (GABA) | Cysteine                               | 1 | -    | -    | -    |
| Malic acid                      | Betaine, creatinine                    | - | -    | 0.89 | -    |
| Malic acid                      | Glutamic acid, alanine                 | - | -    | 0.83 | -    |
| Malic acid                      | Glutamine, proline                     | - | -    | -    | 0.71 |
| Succinic acid                   | Creatinine, malic acid, alanine        | - | 0.94 | -    | -    |
| Succinic acid                   | Acetate                                | - | -    | 0.83 | -    |
| Succinic acid                   | Betaine                                | - | -    | -    | 0.77 |
| $\alpha$ -ketoglutaric acid     | Malic acid                             | - | -    | 0.83 | -    |
| $\alpha$ -ketoglutaric acid     | Succinic acid                          | - | -    | -    | 0.71 |
| Glutamic acid                   | Betaine                                | - | -    | 0.89 | -    |
| Glutamic acid                   | Alanine                                | - | -    | 0.83 | -    |
| Glutamic acid                   | Glutamine, proline                     | - | 0.94 | -    | -    |
| Glutamic acid                   | Succinic acid                          | - | -    | -    | 0.77 |
| Glutamic acid                   | Creatinine                             | - | -    | -    | 0.71 |
| Glutamine                       | Proline                                | 1 | -    | -    | -    |
| Acetate                         | Hypotaurine, creatinine, glutamic acid | - | -    | -    | 0.71 |
| Alanine                         | Betaine                                | - | -    | -    | 0.71 |
| Alanine                         | Acetate                                | - | 0.94 | -    | -    |
| Lactate                         | Threonine                              | - | -    | 0.83 | -    |

### **Box S9: Spearman correlation among metabolites in determination phase with degree of correlation**

In the determination phase (Fig. 4b, Table S7 in the supportive information) tryptophan showed a very strong positive correlation with malic acid (0.89), proline, alanine (0.83). Lactic acid showed a perfect positive correlation with galactose, ethanolamine, aspartate, creatine, acetylcholine, sorbitol, glucose (0.94), coniferyl aldehyde, glycine, L-Cysteinesulfinic acid (0.89). L-Cysteinesulfinic acid showed a very strong positive correlation with glucose, sorbitol, galactose (0.94), Coniferyl aldehyde, glycine (0.83) but moderate correlation with betaine, acetylcholine, ethanolamine, aspartate, creatine (0.71). Galactose showed a very strong positive correlation with Coniferyl aldehyde, glycine (0.94), ethanolamine, aspartate, creatine, acetylcholine, choline, hypotaurine (0.83) but a moderate correlation with betaine, sucrose (0.77). An ethanolamine showed a very strong positive correlation with sorbitol, glucose, and hypotaurine (0.83) but a moderate correlation with Coniferyl aldehyde, glycine (0.77). An aspartate showed a very strong positive correlation with sorbitol, glucose, hypotaurine (0.83) but a moderate correlation with Coniferyl aldehyde, glycine (0.77). Creatine showed a very strong positive correlation with sorbitol, glucose, hypotaurine (0.83) but a moderate correlation with Coniferyl aldehyde, glycine (0.77). Sucrose showed a very strong positive correlation with ethanolamine, aspartate, creatine, acetylcholine, hypotaurine (0.94), lactic acid (0.83) moderate correlation with glucose (0.77), Coniferyl aldehyde, glycine, choline (0.71). An acetylcholine showed a very strong positive correlation with sorbitol, glucose, hypotaurine (0.83) but a moderate correlation with Coniferyl aldehyde, Glycine (0.77). Sorbitol showed a very strong positive correlation with glucose, galactose (0.89) but a moderate correlation with Coniferyl aldehyde, glycine (0.77). Glucose showed a very strong positive correlation with Coniferyl aldehyde, glycine (0.94), choline, hypotaurine (0.83) but a moderate correlation with betaine (0.77). Choline showed a very strong positive correlation with hypotaurine (0.83), but a moderate correlation with L-Cysteinesulfinic acid (0.77), Coniferyl aldehyde, glycine (0.71). Hypotaurine showed a moderate correlation with lactic acid, glycine (0.77). Triethanolamine showed a moderate correlation with glutamine (0.71). Betaine showed a very strong positive correlation with Coniferyl aldehyde, glycine (0.89) whereas a moderate correlation with glutamic acid (0.71).  $\gamma$ -Amino-butyrate (GABA) showed a very strong positive correlation with isethionic acid, creatinine (0.83). Cysteine showed a very strong positive correlation with isethionic acid, creatinine,  $\gamma$ -Amino-butyrate (GABA) (0.89). Malic acid showed a very strong positive correlation with tryptophan (0.89), proline (0.83). Succinic acid showed a moderate correlation with threonine (0.71). glutamic acid showed a very strong positive correlation with proline,  $\alpha$ -ketoglutaric acid, lactate (0.83). lactate showed a very strong positive correlation with threonine (0.89).



Table S7. Spearman correlation among metabolites in determination phase with degree of correlation

| Metabolites             | Correlated metabolites                                                         | Perfect correlation (1) | Very strong correlation (+0.9) | Very strong correlation (+0.8) | Strong correlation (+0.7) |
|-------------------------|--------------------------------------------------------------------------------|-------------------------|--------------------------------|--------------------------------|---------------------------|
| Tryptophan              | Proline, alanine                                                               | -                       | -                              | 0.83                           | -                         |
| Lactic acid             | Galactose, ethanolamine, aspartate, creatine, acetylcholine, sorbitol, glucose | -                       | 0.94                           | -                              | -                         |
| Lactic acid             | Coniferyl aldehyde, glycine, L-Cysteinesulfinic acid                           | -                       | -                              | 0.89                           | -                         |
| L-Cysteinesulfinic acid | Galactose, sorbitol, glucose                                                   | -                       | 0.94                           | -                              | -                         |
| L-Cysteinesulfinic acid | Coniferyl aldehyde, glycine                                                    | -                       | -                              | 0.83                           | -                         |
| L-Cysteinesulfinic acid | Betaine, acetylcholine, ethanolamine, aspartate, creatine                      | -                       | -                              | -                              | 0.71                      |
| Galactose               | Ethanolamine, aspartate, creatine, acetylcholine, choline, hypotaurine         | -                       | -                              | 0.83                           | -                         |
| Galactose               | Coniferyl aldehyde, glycine                                                    | -                       | 0.94                           | -                              | -                         |
| Galactose               | betaine, sucrose                                                               | -                       | -                              | -                              | 0.77                      |
| Ethanolamine            | Sorbitol, glucose, hypotaurine                                                 | -                       | -                              | 0.83                           | -                         |
| Ethanolamine            | Aspartate, creatine, acetylcholine                                             | 1                       | -                              | -                              | -                         |
| Ethanolamine            | Coniferyl aldehyde, glycine                                                    | -                       | -                              | -                              | 0.77                      |
| Aspartate               | Acetylcholine, creatine                                                        | 1                       | -                              | -                              | -                         |
| Aspartate               | Sorbitol, glucose, hypotaurine                                                 | -                       | -                              | 0.83                           | -                         |
| Aspartate               | Coniferyl aldehyde, glycine                                                    | -                       | -                              | -                              | 0.77                      |
| Creatine                | Sorbitol, glucose, hypotaurine                                                 | -                       | -                              | 0.83                           | -                         |
| Creatine                | Coniferyl aldehyde, glycine                                                    | -                       | -                              | -                              | 0.77                      |
| Sucrose                 | Lactic acid                                                                    | -                       | -                              | 0.83                           | -                         |

|                                 |                                                               |   |      |      |      |
|---------------------------------|---------------------------------------------------------------|---|------|------|------|
| Sucrose                         | Ethanolamine, aspartate, creatine, acetylcholine, hypotaurine | - | 0.94 | -    | -    |
| Sucrose                         | Glucose                                                       | - | -    | -    | 0.77 |
| Sucrose                         | Coniferyl aldehyde, glycine, choline                          | - | -    | -    | 0.71 |
| Acetylcholine                   | creatine                                                      | 1 | -    | -    | -    |
| Acetylcholine                   | Sorbitol, glucose, hypotaurine                                | - | -    | 0.83 | -    |
| Acetylcholine                   | Coniferyl aldehyde, glycine                                   | - | -    | -    | 0.77 |
| Sorbitol                        | Glucose, galactose                                            | - | -    | 0.89 | -    |
| Sorbitol                        | Coniferyl aldehyde, glycine                                   | - | -    | -    | 0.77 |
| Glucose                         | Coniferyl aldehyde, glycine                                   | - | 0.94 | -    | -    |
| Glucose                         | Galactose                                                     | 1 | -    | -    | -    |
| Glucose                         | Choline, hypotaurine                                          | - | -    | 0.83 | -    |
| Glucose                         | Betaine                                                       | - | -    | -    | 0.77 |
| Glycine                         | Coniferyl aldehyde                                            | 1 | -    | -    | -    |
| Choline                         | L-Cysteinesulfinic acid                                       | - | -    | -    | 0.77 |
| Choline                         | Coniferyl aldehyde, glycine                                   | - | -    | -    | 0.71 |
| Choline                         | Hypotaurine                                                   | - | -    | 0.89 | -    |
| Hypotaurine                     | Lactic acid, glycine                                          | - | -    | -    | 0.77 |
| Triethanolamine                 | Glutamine                                                     | - | -    | -    | 0.71 |
| Betaine                         | Coniferyl aldehyde, glycine                                   | - | -    | 0.89 | -    |
| Betaine                         | Glutamic acid                                                 | - | -    | -    | 0.71 |
| Isethionic acid                 | Creatinine                                                    | 1 | -    | -    | -    |
| $\gamma$ -Amino-butyrate (GABA) | Isethionic acid, creatinine                                   | - | -    | 0.83 | -    |
| Cysteine                        | Isethionic acid, creatinine, $\gamma$ -Amino-butyrate (GABA)  | - | -    | 0.89 | -    |
| Malic acid                      | Tryptophan                                                    | - | -    | 0.89 | -    |
| Malic acid                      | Proline                                                       | - | -    | 0.83 | -    |
| Succinic acid                   | Threonine                                                     | - | -    | -    | 0.71 |
| Glutamic acid                   | Proline, a-ketoglutaric acid, lactate                         | - | -    | 0.83 | -    |
| Lactate                         | threonine                                                     | - | -    | 0.89 | -    |

**Box S10: Spearman correlation among metabolites in determination phase with degree of correlation**

In the differentiation phase (Fig. 4c, Table S8 in the supportive information) tryptophan showed a very strong positive correlation with betaine, glutamic acid (0.83). L-Cysteinesulfinic showed moderate correlation with acetylcholine (0.71). Lactic acid showed a moderate correlation with creatine (0.83). Galactose showed a very strong positive correlation with succinic acid (0.83). Creatine showed a moderate correlation with sucrose, sorbitol (0.77). Sucrose showed a very strong positive correlation with sorbitol (0.89) and a moderate correlation with isethionic acid (0.77). Acetylcholine showed a moderate correlation with glycine, cysteine (0.77), threonine (0.71). Sorbitol showed a moderate correlation with triethanolamine (0.71). Glucose showed a very strong positive correlation with coniferyl aldehyde (0.89). Coniferyl aldehyde showed a moderate correlation with triethanolamine (0.77). Choline showed a moderate correlation with threonine (0.77). Hypotaurine showed a moderate correlation with  $\alpha$ -ketoglutaric acid, lactate, galactose (0.77). Betaine showed a very strong positive correlation with hypotaurine (0.83) while a moderate correlation with succinic acid acetate (0.77). Cysteine showed a very strong positive correlation with glycine (0.89) while a moderate correlation with L-Cysteinesulfinic acid (0.77). Malic acid showed a very strong positive correlation with betaine (0.88),  $\alpha$ -ketoglutaric acid (0.83) while a moderate correlation with lactate, galactose (0.71). Succinic acid showed a moderate correlation with glutamic acid (0.77), tryptophan (0.71).  $\alpha$ -ketoglutaric acid showed a very strong positive correlation with galactose (0.89), betaine (0.83) but a moderate correlation with glutamic acid (0.71). Glutamic acid showed a very strong positive correlation with betaine (0.89) but a moderate correlation with alanine (0.71). Glutamine showed a moderate correlation with proline (0.71).

Table S8. Spearman correlation among metabolites in differentiation phase with degree of correlation

| Metabolite              | Correlated metabolite  | Perfect correlation (1) | Very strong correlation (+ 0.9) | Very strong correlation (+ 0.8) | Strong correlation (+0.7) |
|-------------------------|------------------------|-------------------------|---------------------------------|---------------------------------|---------------------------|
| Tryptophan              | Acetate                | -                       | 0.94                            | -                               | -                         |
| Tryptophan              | Betaine, glutamic acid | -                       | -                               | 0.83                            | -                         |
| Lactic acid             | Creatine               | -                       | -                               | -                               | 0.71                      |
| L-Cysteinesulfinic acid | Glycine                | -                       | 0.94                            | -                               | -                         |
| L-Cysteinesulfinic acid | Acetylcholine          | -                       | -                               | -                               | 0.71                      |
| Galactose               | Succinic acid,         | -                       | -                               | 0.83                            | -                         |
| Creatine                | Sucrose, sorbitol      | -                       | -                               | -                               | 0.77                      |
| Sucrose                 | Isethionic acid        | -                       | -                               | -                               | 0.77                      |
| Sucrose                 | Sorbitol               | -                       | -                               | 0.89                            | -                         |
| Acetylcholine           | Threonine              | -                       | -                               | -                               | 0.71                      |
| Acetylcholine           | Glycine, cysteine      | -                       | -                               | -                               | 0.77                      |
| Sorbitol                | Triethanolamine        | -                       | -                               | -                               | 0.71                      |
| Glucose                 | Triethanolamine        | -                       | 0.94                            | -                               | -                         |
| Glucose                 | Coniferyl aldehyde     | -                       | -                               | 0.89                            | -                         |
| Coniferyl aldehyde      | Triethanolamine        | -                       | -                               | -                               | 0.77                      |
| Choline                 | Threonine              | -                       | -                               | -                               | 0.77                      |

|                     |                                         |   |      |      |      |
|---------------------|-----------------------------------------|---|------|------|------|
| Hypotaurine         | a-ketoglutaric acid, lactate, Galactose | - | -    | -    | 0.77 |
| Betaine             | Succinic acid, acetate                  | - | -    | -    | 0.77 |
| Betaine             | Hypotaurine                             | - | -    | 0.83 | -    |
| Cysteine            | Glycine                                 | - | -    | 0.89 | -    |
| Cysteine            | L-Cysteinesulfinic acid                 | - | -    | -    | 0.77 |
| Malic acid          | Hypotaurine                             | - | 0.94 | -    | -    |
| Malic acid          | a-ketoglutaric acid                     | - | -    | 0.83 | -    |
| Malic acid          | Betaine                                 | - | -    | 0.88 | -    |
| Malic acid          | Lactate, galactose                      | - | -    | -    | 0.71 |
| Succinic acid       | Tryptophan                              | - | -    | -    | 0.71 |
| Succinic acid       | Glutamic acid                           | - | -    | -    | 0.77 |
| a-ketoglutaric acid | Succinic acid                           | - | 0.94 | -    | -    |
| a-ketoglutaric acid | Galactose                               | - | -    | 0.89 | -    |
| a-ketoglutaric acid | Betaine                                 | - | -    | 0.83 | -    |
| a-ketoglutaric acid | Glutamic acid                           | - | -    | -    | 0.71 |
| Glutamic acid       | Betaine                                 | - | -    | 0.89 | -    |
| Glutamic acid       | Alanine                                 | - | -    | -    | 0.77 |
| Glutamine           | Proline                                 | - | -    | -    | 0.71 |
